# Supplementary material for: Transport of Viable Bacteria by Dust Plumes in the Eastern Mediterranean
Source: Research Square preprint supplement (doi:10.21203/rs.3.rs-1400821/v1), 2022-03-03
Supplement: Supplementary file 3 [file 124cd195931ab983eb19d95c.xlsx]

## Sheet: Phylum
	Northwest					Northeast					Southwest					Southeast
	Phylum	rRNA	rDNA	not significant	total ASVs	Phylum	rRNA	rDNA	not significant	total ASVs	Phylum	rRNA	rDNA	not significant	total ASVs	Phylum	rRNA	rDNA	not significant	total ASVs
1	Proteobacteria	76	20	335	431	Proteobacteria	164	3	720	887	Firmicutes	730	3	521	1254	Firmicutes	87	9	994	1090
2	Actinobacteriota	33	13	231	277	Bacteroidota	40	3	440	483	Proteobacteria	730	0	294	1024	Proteobacteria	55	3	836	894
3	Firmicutes	24	23	252	299	Actinobacteriota	32	18	748	798	Actinobacteriota	381	2	455	838	Actinobacteriota	23	15	771	809
4	Bacteroidota	10	10	126	146	Firmicutes	24	5	732	761	Bacteroidota	376	0	251	627	Bacteroidota	12	1	594	607
5	Deinococcota	4	2	9	15	Cyanobacteria	13	0	36	49	Deinococcota	30	0	15	45	Campilobacterota	3	0	5	8
6	Cyanobacteria	2	0	19	21	Planctomycetota	8	0	48	56	Gemmatimonadota	28	0	19	47	Fusobacteriota	2	0	5	7
7	Gemmatimonadota	2	0	4	6	Gemmatimonadota	7	2	56	65	Cyanobacteria	26	0	0	26	Deinococcota	1	0	35	36
8	Synergistota	1	0	0	1	Acidobacteriota	6	1	34	41	Chloroflexi	21	0	56	77	Chloroflexi	0	4	97	101
9	Acidobacteriota	0	0	7	7	Deinococcota	4	0	35	39	Planctomycetota	20	0	30	50	Gemmatimonadota	0	1	54	55
10	Chloroflexi	0	2	6	8	Chloroflexi	2	4	98	104	Acidobacteriota	19	0	17	36	Planctomycetota	0	1	51	52
11	Verrucomicrobiota	0	2	6	8	Myxococcota	2	0	28	30	Myxococcota	18	0	11	29	Acidobacteriota	0	0	39	39
12	Myxococcota	0	0	5	5	Fusobacteriota	2	0	4	6	Verrucomicrobiota	13	0	22	35	Cyanobacteria	0	0	24	24
13	Bdellovibrionota	0	0	4	4	Bdellovibrionota	1	0	12	13	Bdellovibrionota	11	0	10	21	Verrucomicrobiota	0	1	23	24
14	Planctomycetota	0	1	3	4	Campilobacterota	1	0	5	6	Campilobacterota	9	0	0	9	Myxococcota	0	0	20	20
15	Campilobacterota	0	0	3	3	Sumerlaeota	1	0	3	4	Spirochaetota	8	0	4	12	Spirochaetota	0	0	13	13
16	Abditibacteriota	0	1	2	3	Verrucomicrobiota	0	0	19	19	Desulfobacterota	6	0	7	13	Bdellovibrionota	0	0	10	10
17	Fusobacteriota	0	0	2	2	Spirochaetota	0	0	9	9	Fusobacteriota	5	0	1	6	Desulfobacterota	0	0	7	7
18	Desulfobacterota	0	1	1	2	Desulfobacterota	0	0	4	4	Fibrobacterota	2	0	2	4	Fibrobacterota	0	0	4	4
19	Armatimonadota	0	0	1	1	Fibrobacterota	0	0	4	4	Armatimonadota	1	0	1	2	Abditibacteriota	0	0	2	2
20	Deferribacterota	0	0	1	1	Abditibacteriota	0	0	3	3	Deferribacterota	1	0	1	2	Deferribacterota	0	0	2	2
21	Dependentiae	0	0	1	1	Nitrospirota	0	0	3	3	Abditibacteriota	1	0	0	1	Patescibacteria	0	0	2	2
22	Fibrobacterota	0	0	1	1	Armatimonadota	0	0	2	2	Halanaerobiaeota	1	0	0	1	Sumerlaeota	0	0	2	2
23	Nitrospirota	0	0	1	1	Patescibacteria	0	0	1	1	Synergistota	1	0	0	1	Elusimicrobiota	0	0	1	1
24	Patescibacteria	0	0	1	1	Synergistota	0	0	1	1	Patescibacteria	0	0	2	2	Halanaerobiaeota	0	0	1	1
25	Spirochaetota	0	0	1	1						Dependentiae	0	0	1	1	Nitrospirota	0	0	1	1
26											Elusimicrobiota	0	0	1	1	Synergistota	0	0	1	1
sum		152	75	1022	1249		307	36	3045	3388		2438	5	1721	4164		183	35	3594	3812

## Sheet: Family
	Northwest					Northeast					Southwest					Southeast
	Family	rRNA	rDNA	not significant	total ASVs	Family	rRNA	rDNA	not significant	total ASVs	Family	rRNA	rDNA	not significant	total ASVs	Family	rRNA	rDNA	not significant	total ASVs
1	Sphingomonadaceae	19	1	68	88	Sphingomonadaceae	39	0	141	180	Lachnospiraceae	191	1	93	285	Lachnospiraceae	24	2	191	217
2	Rhodobacteraceae	13	3	36	52	Rhodobacteraceae	28	0	56	84	Sphingomonadaceae	129	0	60	189	Ruminococcaceae	13	1	75	89
3	Pseudomonadaceae	12	0	19	31	Hymenobacteraceae	21	1	77	99	Ruminococcaceae	82	0	35	117	Rhodobacteraceae	11	0	67	78
4	Rhizobiaceae	7	3	23	33	Beijerinckiaceae	15	0	51	66	Oscillospiraceae	82	0	25	107	Lactobacillaceae	11	0	34	45
5	Cellulomonadaceae	6	0	11	17	Acetobacteraceae	13	0	56	69	Rhodobacteraceae	77	0	16	93	Sphingomonadaceae	10	0	150	160
6	Micrococcaceae	5	1	32	38	Rhizobiaceae	13	0	42	55	Hymenobacteraceae	58	0	17	75	Oscillospiraceae	10	0	85	95
7	Lactobacillaceae	5	0	23	28	Moraxellaceae	11	0	21	32	Bacillaceae	55	0	77	132	Pseudomonadaceae	9	0	39	48
8	Devosiaceae	4	0	11	15	Caulobacteraceae	8	0	21	29	Lactobacillaceae	53	0	4	57	Corynebacteriaceae	8	0	30	38
9	Acetobacteraceae	4	0	9	13	Azospirillaceae	7	0	16	23	Rhizobiaceae	52	0	10	62	Bacteroidaceae	7	0	56	63
10	Deinococcaceae	4	1	9	14	Pseudomonadaceae	6	0	37	43	Bacteroidaceae	50	0	15	65	Beijerinckiaceae	6	0	69	75
11	Oxalobacteraceae	3	1	18	22	Cellulomonadaceae	6	0	20	26	Rikenellaceae	47	0	34	81	Rhizobiaceae	6	0	55	61
12	Pseudonocardiaceae	3	1	15	19	Devosiaceae	6	1	19	26	Acetobacteraceae	45	0	10	55	Streptomycetaceae	6	0	32	38
13	Hymenobacteraceae	3	0	12	15	Geminicoccaceae	6	0	15	21	Pseudomonadaceae	44	0	6	50	Staphylococcaceae	4	0	28	32
14	Microbacteriaceae	3	2	12	17	Solirubrobacteraceae	5	0	57	62	Micrococcaceae	42	0	32	74	Devosiaceae	4	0	21	25
15	Corynebacteriaceae	3	0	11	14	Ruminococcaceae	5	0	47	52	Prevotellaceae	41	0	31	72	Microbacteriaceae	3	1	38	42
16	Kineosporiaceae	3	0	9	12	Sphingobacteriaceae	5	0	43	48	Beijerinckiaceae	39	0	16	55	Moraxellaceae	3	0	32	35
17	Weeksellaceae	3	0	8	11	Longimicrobiaceae	5	1	30	36	Moraxellaceae	37	0	7	44	Erysipelatoclostridiaceae	3	0	11	14
18	Caulobacteraceae	3	0	5	8	Chitinophagaceae	4	1	73	78	Chitinophagaceae	36	0	34	70	Peptostreptococcaceae	3	0	7	10
19	Planococcaceae	2	3	36	41	Carnobacteriaceae	4	0	34	38	Comamonadaceae	36	0	10	46	Selenomonadaceae	3	0	6	9
20	Bacillaceae	2	6	32	40	Deinococcaceae	4	0	19	23	Nocardioidaceae	35	0	62	97	Streptococcaceae	3	0	4	7
21	Nocardioidaceae	2	5	24	31	Chroococcidiopsaceae	4	0	16	20	Planococcaceae	34	1	52	87	Rikenellaceae	2	1	75	78
22	Beijerinckiaceae	2	0	19	21	Isosphaeraceae	4	0	14	18	Sphingobacteriaceae	34	0	20	54	Micrococcaceae	2	2	69	73
23	Chitinophagaceae	2	1	19	22	Bryobacteraceae	4	0	1	5	Oxalobacteraceae	34	0	12	46	Clostridiaceae	2	0	26	28
24	Carnobacteriaceae	2	2	18	22	Lachnospiraceae	3	1	146	150	Pseudonocardiaceae	30	0	50	80	Aerococcaceae	2	0	9	11
25	Comamonadaceae	2	1	14	17	Planococcaceae	3	0	71	74	Microbacteriaceae	28	0	15	43	Fusobacteriaceae	2	0	3	5
26	Intrasporangiaceae	2	0	7	9	Microbacteriaceae	3	1	29	33	Corynebacteriaceae	28	0	14	42	Leuconostocaceae	2	0	2	4
27	Paenibacillaceae	2	1	7	10	Lactobacillaceae	3	0	20	23	Caulobacteraceae	26	0	12	38	Campylobacteraceae	2	0	0	2
28	Solirubrobacteraceae	2	0	7	9	Cytophagaceae	3	0	12	15	Weeksellaceae	26	0	10	36	Bacillaceae	1	0	118	119
29	Streptococcaceae	2	0	4	6	Unknown Family	3	0	6	9	Carnobacteriaceae	25	0	17	42	Planococcaceae	1	0	82	83
30	Azospirillaceae	2	0	1	3	Nocardioidaceae	2	3	94	99	Deinococcaceae	25	0	9	34	Hymenobacteraceae	1	0	76	77
31	Dermatophilaceae	2	0	1	3	Micrococcaceae	2	1	56	59	Christensenellaceae	24	0	36	60	Sphingobacteriaceae	1	0	60	61
32	Moraxellaceae	1	1	31	33	JG30-KF-CM45	2	2	48	52	Flavobacteriaceae	23	0	17	40	Solirubrobacteraceae	1	0	49	50
33	Lachnospiraceae	1	2	30	33	Flavobacteriaceae	2	0	34	36	Devosiaceae	23	0	2	25	Comamonadaceae	1	0	27	28
34	Geodermatophilaceae	1	0	19	20	Streptomycetaceae	2	0	33	35	Xanthomonadaceae	22	0	27	49	Deinococcaceae	1	0	22	23
35	Ruminococcaceae	1	3	15	19	Xanthomonadaceae	2	0	33	35	Streptomycetaceae	22	0	20	42	Caulobacteraceae	1	0	19	20
36	Bacteroidaceae	1	0	14	15	Comamonadaceae	2	1	31	34	Clostridiaceae	20	0	13	33	Azospirillaceae	1	0	16	17
37	Flavobacteriaceae	1	2	14	17	Intrasporangiaceae	2	0	31	33	Cellulomonadaceae	20	0	12	32	Erysipelotrichaceae	1	0	16	17
38	Enterobacteriaceae	1	0	11	12	Corynebacteriaceae	2	0	29	31	Solirubrobacteraceae	18	0	17	35	Butyricicoccaceae	1	0	13	14
39	Oscillospiraceae	1	0	11	12	Gemmatimonadaceae	2	1	26	29	Longimicrobiaceae	16	0	8	24	Enterobacteriaceae	1	0	12	13
40	Chroococcidiopsaceae	1	0	9	10	Kineosporiaceae	2	1	25	28	Paenibacillaceae	15	1	11	27	Burkholderiaceae	1	0	11	12
41	Xanthomonadaceae	1	3	9	13	WD2101 soil group	2	0	19	21	Azospirillaceae	15	0	5	20	Thermoactinomycetaceae	1	0	8	9
42	Leuconostocaceae	1	0	5	6	Blastocatellaceae	2	0	14	16	Geodermatophilaceae	14	0	30	44	Dietziaceae	1	0	7	8
43	Nocardiaceae	1	0	5	6	Myxococcaceae	2	0	14	16	Butyricicoccaceae	14	0	1	15	Xanthobacteraceae	1	0	7	8
44	Selenomonadaceae	1	0	5	6	Peptostreptococcaceae	2	0	9	11	Micromonosporaceae	13	0	9	22	Bifidobacteriaceae	1	0	4	5
45	Erysipelotrichaceae	1	0	4	5	Burkholderiaceae	2	0	8	10	Halomonadaceae	13	0	4	17	Dermabacteraceae	1	0	4	5
46	Coleofasciculaceae	1	0	3	4	Xanthobacteraceae	2	0	6	8	Intrasporangiaceae	12	0	25	37	Acidaminococcaceae	1	0	3	4
47	Gemmatimonadaceae	1	0	2	3	Streptococcaceae	2	0	4	6	Staphylococcaceae	12	0	20	32	Dysgonomonadaceae	1	0	3	4
48	Longimicrobiaceae	1	0	2	3	Fusobacteriaceae	2	0	3	5	Gemmatimonadaceae	12	0	11	23	Anaerococcus	1	0	1	2
49	Marinococcaceae	1	0	2	3	Leptolyngbyaceae	2	0	1	3	Enterobacteriaceae	11	0	4	15	Helicobacteraceae	1	0	1	2
50	Pasteurellaceae	1	0	2	3	Bacillaceae	1	1	97	99	Peptostreptococcaceae	11	0	2	13	Nocardioidaceae	0	6	88	94
51	Neisseriaceae	1	0	1	2	Pseudonocardiaceae	1	2	63	66	UCG-010	10	0	15	25	Chitinophagaceae	0	0	83	83
52	Veillonellaceae	1	0	1	2	Geodermatophilaceae	1	3	60	64	JG30-KF-CM45	9	0	30	39	Pseudonocardiaceae	0	0	74	74
53	Gemellaceae	1	0	0	1	Oscillospiraceae	1	2	50	53	Kineosporiaceae	9	0	13	22	Prevotellaceae	0	0	65	65
54	Synergistaceae	1	0	0	1	Oxalobacteraceae	1	1	39	41	Erysipelatoclostridiaceae	9	0	6	15	Acetobacteraceae	0	0	61	61
55	Sphingobacteriaceae	0	1	20	21	Prevotellaceae	1	0	37	38	Blastocatellaceae	9	0	5	14	Geodermatophilaceae	0	0	58	58
56	Staphylococcaceae	0	1	13	14	Rubrobacteriaceae	1	2	24	27	Muribaculaceae	9	0	5	14	Christensenellaceae	0	0	57	57
57	Streptomycetaceae	0	0	13	13	Spirosomaceae	1	0	16	17	Isosphaeraceae	9	0	4	13	Carnobacteriaceae	0	0	46	46
58	Bogoriellaceae	0	0	10	10	Bogoriellaceae	1	2	14	17	Spirosomaceae	9	0	4	13	Xanthomonadaceae	0	0	45	45
59	Spirosomaceae	0	0	10	10	Nocardiaceae	1	0	10	11	Succinivibrionaceae	9	0	4	13	Flavobacteriaceae	0	0	42	42
60	Clostridiaceae	0	0	8	8	Succinivibrionaceae	1	0	10	11	Burkholderiaceae	9	0	2	11	AKIW781	0	1	40	41
61	Nocardiopsaceae	0	1	7	8	Weeksellaceae	1	0	10	11	Selenomonadaceae	9	0	1	10	JG30-KF-CM45	0	3	39	42
62	Brevibacteriaceae	0	1	6	7	Coleofasciculaceae	1	0	7	8	[Eubacterium] coprostanoligenes group	8	0	21	29	Oxalobacteraceae	0	2	38	40
63	67-14	0	0	6	6	Cyclobacteriaceae	1	1	7	9	Erysipelotrichaceae	8	0	13	21	Intrasporangiaceae	0	0	38	38
64	Promicromonosporaceae	0	0	6	6	D05-2	1	0	3	4	Aerococcaceae	8	0	4	12	UCG-010	0	0	32	32
65	Rikenellaceae	0	0	6	6	Dysgonomonadaceae	1	0	3	4	Myxococcaceae	8	0	4	12	Gemmatimonadaceae	0	0	31	31
66	Peptostreptococcaceae	0	1	5	6	Oligoflexus	1	0	3	4	Spirochaetaceae	8	0	4	12	[Eubacterium] coprostanoligenes group	0	3	28	31
67	Prevotellaceae	0	3	5	8	Propionibacteriaceae	1	0	3	4	Bogoriellaceae	7	0	12	19	67-14	0	1	28	29
68	Cellvibrionaceae	0	0	5	5	Sumerlaeaceae	1	0	3	4	Bifidobacteriaceae	7	0	8	15	Cellulomonadaceae	0	0	25	25
69	Enterococcaceae	0	0	5	5	Gemmataceae	1	0	2	3	Rubrobacteriaceae	7	0	7	14	Kineosporiaceae	0	0	24	24
70	Aerococcaceae	0	1	4	5	Tepidisphaeraceae	1	0	2	3	Cellvibrionaceae	7	0	6	13	Nocardiopsaceae	0	0	24	24
71	Alteromonadaceae	0	1	4	5	Campylobacteraceae	1	0	1	2	Nocardiaceae	7	0	6	13	Longimicrobiaceae	0	1	23	24
72	Butyricicoccaceae	0	2	4	6	Nostocaceae	1	0	1	2	Sutterellaceae	7	0	2	9	Micromonosporaceae	0	0	23	23
73	Alcaligenaceae	0	0	4	4	Thermosynechococcaceae	1	0	1	2	Chroococcidiopsaceae	7	0	0	7	Anaerovoracaceae	0	1	21	22
74	Cytophagaceae	0	0	4	4	Aquaspirillaceae	1	0	0	1	67-14	6	0	19	25	Weeksellaceae	0	0	20	20
75	Mycobacteriaceae	0	0	4	4	Nodosilineaceae	1	0	0	1	Anaerovoracaceae	6	0	15	21	Paenibacillaceae	0	2	18	20
76	JG30-KF-CM45	0	2	3	5	Rikenellaceae	0	0	38	38	Nitrosomonadaceae	6	0	8	14	Muribaculaceae	0	0	17	17
77	[Eubacterium] coprostanoligenes group	0	0	3	3	Bacteroidaceae	0	0	37	37	Pirellulaceae	6	0	8	14	Bogoriellaceae	0	1	16	17
78	Aeromonadaceae	0	0	3	3	67-14	0	1	34	35	Cytophagaceae	6	0	7	13	Geminicoccaceae	0	0	16	16
79	Dermabacteraceae	0	0	3	3	AKIW781	0	2	31	33	Bacteriovoracaceae	6	0	6	12	WD2101 soil group	0	0	16	16
80	Dietziaceae	0	0	3	3	Christensenellaceae	0	0	31	31	Alcaligenaceae	6	0	5	11	Isosphaeraceae	0	1	15	16
81	Exiguobacteraceae	0	0	3	3	Staphylococcaceae	0	1	30	31	Xanthobacteraceae	6	0	2	8	Alcaligenaceae	0	0	15	15
82	Propionibacteriaceae	0	0	3	3	[Eubacterium] coprostanoligenes group	0	0	23	23	Rickettsiaceae	6	0	1	7	Halomonadaceae	0	0	14	14
83	Rickettsiaceae	0	0	3	3	Nocardiopsaceae	0	0	21	21	Leuconostocaceae	6	0	0	6	Rubrobacteriaceae	0	0	14	14
84	Thermoactinomycetaceae	0	0	3	3	Clostridiaceae	0	0	20	20	Promicromonosporaceae	5	2	7	14	Spirosomaceae	0	0	14	14
85	Thermoanaerobaculaceae	0	0	3	3	UCG-010	0	0	20	20	Trueperaceae	5	0	6	11	Succinivibrionaceae	0	0	14	14
86	Unknown Family	0	0	3	3	Paenibacillaceae	0	0	19	19	Vicinamibacteraceae	5	0	5	10	Myxococcaceae	0	0	13	13
87	Abditibacteriaceae	0	1	2	3	Micromonosporaceae	0	0	18	18	Desulfovibrionaceae	5	0	4	9	Pirellulaceae	0	0	13	13
88	Geminicoccaceae	0	1	2	3	Trueperaceae	0	0	15	15	Dietziaceae	5	0	3	8	Spirochaetaceae	0	0	13	13
89	Acidiferrobacteraceae	0	0	2	2	Enterobacteriaceae	0	0	13	13	Streptococcaceae	5	0	3	8	Trueperaceae	0	0	13	13
90	Actinomycetaceae	0	0	2	2	Mycobacteriaceae	0	0	13	13	Ilumatobacteraceae	5	0	2	7	Cellvibrionaceae	0	0	12	12
91	Arcobacteraceae	0	0	2	2	Vicinamibacteraceae	0	0	11	11	Steroidobacteraceae	5	0	2	7	Monoglobaceae	0	0	12	12
92	Atopobiaceae	0	0	2	2	Anaerovoracaceae	0	0	10	10	Fusobacteriaceae	5	0	1	6	Blastocatellaceae	0	0	11	11
93	Bacteriovoracaceae	0	0	2	2	Brevibacteriaceae	0	1	9	10	Arcobacteraceae	5	0	0	5	Bryobacteraceae	0	0	11	11
94	Bifidobacteriaceae	0	0	2	2	Alicyclobacillaceae	0	0	9	9	Dermabacteraceae	5	0	0	5	Chroococcidiopsaceae	0	0	11	11
95	Christensenellaceae	0	0	2	2	Halomonadaceae	0	0	9	9	Enterococcaceae	5	0	0	5	Cyclobacteriaceae	0	0	11	11
96	Dysgonomonadaceae	0	0	2	2	Ilumatobacteraceae	0	0	9	9	Nostocaceae	5	0	0	5	Brevibacteriaceae	0	0	10	10
97	Erwiniaceae	0	0	2	2	Nitrosomonadaceae	0	0	9	9	Veillonellaceae	5	0	0	5	Tannerellaceae	0	0	10	10
98	Fusobacteriaceae	0	0	2	2	Pirellulaceae	0	0	9	9	Mycobacteriaceae	4	0	9	13	Unknown Family	0	0	10	10
99	Iamiaceae	0	0	2	2	Promicromonosporaceae	0	0	9	9	Gaiellaceae	4	0	8	12	Mycobacteriaceae	0	2	9	11
100	Legionellaceae	0	0	2	2	Aerococcaceae	0	0	8	8	Geminicoccaceae	4	0	6	10	Nocardiaceae	0	0	9	9
101	Leptolyngbyaceae	0	0	2	2	Erysipelatoclostridiaceae	0	0	8	8	Iamiaceae	4	0	6	10	Promicromonosporaceae	0	0	9	9
102	Muribaculaceae	0	0	2	2	Muribaculaceae	0	0	8	8	Tannerellaceae	4	0	5	9	Alicyclobacillaceae	0	0	8	8
103	Nakamurellaceae	0	0	2	2	Spirochaetaceae	0	0	8	8	Acidaminococcaceae	4	0	3	7	Gaiellaceae	0	0	8	8
104	Nitrosomonadaceae	0	0	2	2	Ardenticatenaceae	0	0	7	7	Peptococcaceae	4	0	3	7	Ilumatobacteraceae	0	0	8	8
105	Phormidiaceae	0	0	2	2	Cellvibrionaceae	0	0	7	7	Alteromonadaceae	4	0	2	6	Thermoanaerobaculaceae	0	0	8	8
106	Pirellulaceae	0	0	2	2	Dietziaceae	0	0	7	7	Eggerthellaceae	4	0	2	6	Bacteroidales RF16 group	0	0	7	7
107	Polyangiaceae	0	0	2	2	Iamiaceae	0	0	7	7	Glycomycetaceae	4	0	2	6	Cytophagaceae	0	0	7	7
108	Rhodanobacteraceae	0	0	2	2	Gaiellaceae	0	1	6	7	Aeromonadaceae	4	0	1	5	F082	0	0	7	7
109	Rhodocyclaceae	0	0	2	2	Thermoanaerobaculaceae	0	1	6	7	Nakamurellaceae	4	0	1	5	Microscillaceae	0	0	7	7
110	SM2D12	0	0	2	2	Alcaligenaceae	0	0	6	6	Oligoflexus	4	0	1	5	Sporichthyaceae	0	0	7	7
111	Solimonadaceae	0	0	2	2	Bacteriovoracaceae	0	0	6	6	Polyangiaceae	4	0	1	5	Vicinamibacteraceae	0	0	7	7
112	Steroidobacteraceae	0	0	2	2	Bacteroidales RF16 group	0	0	6	6	Rhodocyclaceae	4	0	1	5	Nitrosomonadaceae	0	1	6	7
113	Tannerellaceae	0	0	2	2	Bifidobacteriaceae	0	0	6	6	Phormidiaceae	4	0	0	4	Anaerolineaceae	0	0	6	6
114	Tissierella	0	0	2	2	Butyricicoccaceae	0	0	6	6	Nocardiopsaceae	3	0	21	24	Bdellovibrionaceae	0	0	6	6
115	Xanthobacteraceae	0	0	2	2	Chthoniobacteraceae	0	0	6	6	AKIW781	3	0	8	11	Fastidiosipila	0	0	6	6
116	Barnesiellaceae	0	2	1	3	Erysipelotrichaceae	0	0	6	6	Monoglobaceae	3	0	7	10	Iamiaceae	0	0	6	6
117	Desulfovibrionaceae	0	1	1	2	Microscillaceae	0	0	6	6	Bacteroidales RF16 group	3	0	6	9	Sutterellaceae	0	0	6	6
118	Gaiellaceae	0	1	1	2	Monoglobaceae	0	0	6	6	Dysgonomonadaceae	3	0	5	8	A4b	0	0	5	5
119	Gallionellaceae	0	1	1	2	Tannerellaceae	0	0	6	6	Actinomycetaceae	3	0	4	7	Actinomycetaceae	0	0	5	5
120	Paludibacteraceae	0	1	1	2	Thermoactinomycetaceae	0	0	6	6	F082	3	0	4	7	Chthoniobacteraceae	0	0	5	5
121	WD2101 soil group	0	1	1	2	Euzebyaceae	0	0	5	5	Barnesiellaceae	3	0	3	6	Desulfovibrionaceae	0	0	5	5
122	A4b	0	0	1	1	Leuconostocaceae	0	0	5	5	Nannocystaceae	3	0	3	6	Eggerthellaceae	0	0	5	5
123	Acidaminococcaceae	0	0	1	1	Nitrosococcaceae	0	0	5	5	Saprospiraceae	3	0	3	6	Gemmataceae	0	0	5	5
124	AKAU3644	0	0	1	1	Rhodocyclaceae	0	0	5	5	Thermomonosporaceae	3	0	3	6	Glycomycetaceae	0	0	5	5
125	Akkermansiaceae	0	0	1	1	Selenomonadaceae	0	0	5	5	Bryobacteraceae	3	0	2	5	Nitrosococcaceae	0	0	5	5
126	Anaerococcus	0	0	1	1	Sporichthyaceae	0	0	5	5	Cyclobacteriaceae	3	0	2	5	Opitutaceae	0	0	5	5
127	Anaerofustaceae	0	0	1	1	Sutterellaceae	0	0	5	5	Haliangiaceae	3	0	2	5	Peptococcaceae	0	0	5	5
128	Anaerovoracaceae	0	0	1	1	Thermomonosporaceae	0	0	5	5	Hyphomicrobiaceae	3	0	2	5	Prolixibacteraceae	0	0	5	5
129	Ardenticatenaceae	0	0	1	1	Acidaminococcaceae	0	0	4	4	Pasteurellaceae	3	0	2	5	Steroidobacteraceae	0	0	5	5
130	Balneolaceae	0	0	1	1	Dermatophilaceae	0	0	4	4	Coriobacteriales Incertae Sedis	3	0	1	4	Thermomonosporaceae	0	0	5	5
131	Bdellovibrionaceae	0	0	1	1	Idiomarinaceae	0	0	4	4	Marinococcaceae	3	0	1	4	Akkermansiaceae	0	1	4	5
132	Beutenbergiaceae	0	0	1	1	Microtrichaceae	0	0	4	4	Pseudohongiellaceae	3	0	1	4	Fibrobacteraceae	0	0	4	4
133	Blastocatellaceae	0	0	1	1	Nakamurellaceae	0	0	4	4	Chloroflexaceae	3	0	0	3	Idiomarinaceae	0	0	4	4
134	Bryobacteraceae	0	0	1	1	Peptococcaceae	0	0	4	4	Coleofasciculaceae	3	0	0	3	Nitriliruptoraceae	0	0	4	4
135	Caedibacteraceae	0	0	1	1	Phormidiaceae	0	0	4	4	Dermatophilaceae	3	0	0	3	Pasteurellaceae	0	0	4	4
136	Caldilineaceae	0	0	1	1	Sandaracinaceae	0	0	4	4	Neisseriaceae	3	0	0	3	Rhodanobacteraceae	0	0	4	4
137	Campylobacteraceae	0	0	1	1	Steroidobacteraceae	0	0	4	4	W5053	3	0	0	3	Veillonellaceae	0	0	4	4
138	Candidatus Hepatincola	0	0	1	1	Abditibacteriaceae	0	0	3	3	WD2101 soil group	2	0	9	11	Atopobiaceae	0	1	3	4
139	Catellicoccaceae	0	0	1	1	Actinomycetaceae	0	0	3	3	Chthoniobacteraceae	2	0	8	10	Streptosporangiaceae	0	1	3	4
140	Coxiellaceae	0	0	1	1	Alteromonadaceae	0	0	3	3	Ardenticatenaceae	2	0	4	6	Acholeplasmataceae	0	0	3	3
141	Crocinitomicaceae	0	0	1	1	Anaerolineaceae	0	0	3	3	Microscillaceae	2	0	4	6	Alcanivoracaceae1	0	0	3	3
142	Deferribacteraceae	0	0	1	1	Atopobiaceae	0	0	3	3	Thermoanaerobaculaceae	2	0	4	6	Alteromonadaceae	0	0	3	3
143	Defluviicoccaceae	0	0	1	1	Bdellovibrionaceae	0	0	3	3	Crocinitomicaceae	2	0	3	5	Coriobacteriales Incertae Sedis	0	0	3	3
144	env.OPS 17	0	0	1	1	Caldilineaceae	0	0	3	3	Idiomarinaceae	2	0	3	5	Crocinitomicaceae	0	0	3	3
145	Fibrobacteraceae	0	0	1	1	Dermabacteraceae	0	0	3	3	Microtrichaceae	2	0	3	5	Defluviitaleaceae	0	0	3	3
146	Fimbriimonadaceae	0	0	1	1	Desulfovibrionaceae	0	0	3	3	Fibrobacteraceae	2	0	2	4	Enterococcaceae	0	0	3	3
147	Geitlerinemataceae	0	0	1	1	Enterococcaceae	0	0	3	3	Marinifilaceae	2	0	2	4	Exiguobacteraceae	0	0	3	3
148	Gracilibacter	0	0	1	1	Exiguobacteraceae	0	0	3	3	Opitutaceae	2	0	2	4	Fodinicurvataceae	0	0	3	3
149	Haliangiaceae	0	0	1	1	F082	0	0	3	3	Pedosphaeraceae	2	0	2	4	Microtrichaceae	0	0	3	3
150	Halomonadaceae	0	0	1	1	Fastidiosipila	0	0	3	3	Streptosporangiaceae	2	0	2	4	Nakamurellaceae	0	0	3	3
151	Hyphomicrobiaceae	0	0	1	1	Fibrobacteraceae	0	0	3	3	Anaerococcus	2	0	1	3	p-251-o5	0	0	3	3
152	LWQ8	0	0	1	1	Frankiaceae	0	0	3	3	Exiguobacteraceae	2	0	1	3	Paludibacteraceae	0	0	3	3
153	Methylophilaceae	0	0	1	1	Haliangiaceae	0	0	3	3	Fodinicurvataceae	2	0	1	3	Polyangiaceae	0	0	3	3
154	Micromonosporaceae	0	0	1	1	Marinobacteraceae	0	0	3	3	Herpetosiphonaceae	2	0	1	3	Puniceicoccaceae	0	0	3	3
155	Micropepsaceae	0	0	1	1	Nitriliruptoraceae	0	0	3	3	Parachlamydiaceae	2	0	1	3	Ruaniaceae	0	0	3	3
156	Morganellaceae	0	0	1	1	Nitrospiraceae	0	0	3	3	Rubritaleaceae	2	0	1	3	Saccharofermentans	0	0	3	3
157	Mycoplasmataceae	0	0	1	1	Paludibacteraceae	0	0	3	3	Sporichthyaceae	2	0	1	3	TRA3-20	0	0	3	3
158	Myxococcaceae	0	0	1	1	Pedosphaeraceae	0	0	3	3	Unknown Family	2	0	1	3	Vibrionaceae	0	0	3	3
159	Nitrosococcaceae	0	0	1	1	Streptosporangiaceae	0	0	3	3	Beutenbergiaceae	2	0	0	2	Yersiniaceae	0	0	3	3
160	Nitrospiraceae	0	0	1	1	Veillonellaceae	0	0	3	3	Campylobacteraceae	2	0	0	2	Abditibacteriaceae	0	0	2	2
161	Nostocaceae	0	0	1	1	Acholeplasmataceae	0	0	2	2	D05-2	2	0	0	2	Aeromonadaceae	0	0	2	2
162	NS11-12 marine group	0	0	1	1	Akkermansiaceae	0	0	2	2	Defluviicoccaceae	2	0	0	2	Arcobacteraceae	0	0	2	2
163	NS9 marine group	0	0	1	1	Arcobacteraceae	0	0	2	2	Diplorickettsiaceae	2	0	0	2	Bacteriovoracaceae	0	0	2	2
164	Oligoflexus	0	0	1	1	Balneolaceae	0	0	2	2	Erwiniaceae	2	0	0	2	Bacteroidetes BD2-2	0	0	2	2
165	Opitutaceae	0	0	1	1	Beutenbergiaceae	0	0	2	2	Euzebyaceae	2	0	0	2	Balneolaceae	0	0	2	2
166	Parvularculaceae	0	0	1	1	BIrii41	0	0	2	2	Gallicola	2	0	0	2	Beutenbergiaceae	0	0	2	2
167	Pedosphaeraceae	0	0	1	1	Chloroflexaceae	0	0	2	2	Helcococcus	2	0	0	2	Catellicoccaceae	0	0	2	2
168	Pyrinomonadaceae	0	0	1	1	Defluviitaleaceae	0	0	2	2	Leptolyngbyaceae	2	0	0	2	Coleofasciculaceae	0	0	2	2
169	Rubritaleaceae	0	0	1	1	Demequinaceae	0	0	2	2	Marinilabiliaceae	2	0	0	2	Deferribacteraceae	0	0	2	2
170	Sandaracinaceae	0	0	1	1	Diplorickettsiaceae	0	0	2	2	Puniceispirillales Incertae Sedis	2	0	0	2	Defluviicoccaceae	0	0	2	2
171	Sanguibacteraceae	0	0	1	1	Eggerthellaceae	0	0	2	2	Gemmataceae	1	0	6	7	Demequinaceae	0	0	2	2
172	Saprospiraceae	0	0	1	1	Erwiniaceae	0	0	2	2	Alicyclobacillaceae	1	0	5	6	Erwiniaceae	0	0	2	2
173	Spirochaetaceae	0	0	1	1	Fimbriimonadaceae	0	0	2	2	A4b	1	0	3	4	Euzebyaceae	0	0	2	2
174	Stappiaceae	0	0	1	1	Fodinicurvataceae	0	0	2	2	Akkermansiaceae	1	0	3	4	Frankiaceae	0	0	2	2
175	Streptosporangiales Incertae Sedis	0	0	1	1	Glycomycetaceae	0	0	2	2	Atopobiaceae	1	0	3	4	Gallicola	0	0	2	2
176	Sutterellaceae	0	0	1	1	Helicobacteraceae	0	0	2	2	Methylophilaceae	1	0	3	4	Haliangiaceae	0	0	2	2
177	Thermomonosporaceae	0	0	1	1	Marinilabiliaceae	0	0	2	2	Prolixibacteraceae	1	0	3	4	Kangiellaceae	0	0	2	2
178	Vermiphilaceae	0	0	1	1	Methylophilaceae	0	0	2	2	Reyranellaceae	1	0	3	4	Leptolyngbyaceae	0	0	2	2
179	Verrucomicrobiaceae	0	0	1	1	MWH-CFBk5	0	0	2	2	TRA3-20	1	0	3	4	Leptotrichiaceae	0	0	2	2
180	Vicinamibacteraceae	0	0	1	1	Nannocystaceae	0	0	2	2	Acholeplasmataceae	1	0	2	3	Marinilabiliaceae	0	0	2	2
181	Xiphinematobacteraceae	0	0	1	1	Opitutaceae	0	0	2	2	Coriobacteriaceae	1	0	2	3	Marinobacteraceae	0	0	2	2
182	Yersiniaceae	0	0	1	1	Pasteurellaceae	0	0	2	2	Defluviitaleaceae	1	0	2	3	Marinococcaceae	0	0	2	2
183	Burkholderiaceae	0	1	0	1	Prolixibacteraceae	0	0	2	2	Legionellaceae	1	0	2	3	Methylophilaceae	0	0	2	2
184	Clade I	0	1	0	1	Pseudohongiellaceae	0	0	2	2	Vibrionaceae	1	0	2	3	MWH-CFBk5	0	0	2	2
185	Erysipelatoclostridiaceae	0	1	0	1	Pyrinomonadaceae	0	0	2	2	Victivallaceae	1	0	2	3	Paracaedibacteraceae	0	0	2	2
186	Kiritimatiellaceae	0	1	0	1	Rhodobiaceae	0	0	2	2	Yersiniaceae	1	0	2	3	Phormidiaceae	0	0	2	2
187	Puniceicoccaceae	0	1	0	1	Roseiflexaceae	0	0	2	2	Deferribacteraceae	1	0	1	2	Propionibacteriaceae	0	0	2	2
188	Ruaniaceae	0	1	0	1	Ruaniaceae	0	0	2	2	Garciellaceae	1	0	1	2	Puniceispirillales Incertae Sedis	0	0	2	2
189	SC-I-84	0	1	0	1	Saccharospirillaceae	0	0	2	2	Hahellaceae	1	0	1	2	Pyrinomonadaceae	0	0	2	2
190	Shewanellaceae	0	1	0	1	Sanguibacteraceae	0	0	2	2	Methylophagaceae	1	0	1	2	Rhodocyclaceae	0	0	2	2
191	Trueperaceae	0	1	0	1	Saprospiraceae	0	0	2	2	Morganellaceae	1	0	1	2	Rhodothermaceae	0	0	2	2
192						Symbiobacteraceae	0	0	2	2	MWH-CFBk5	1	0	1	2	Rickettsiaceae	0	0	2	2
193						TRA3-20	0	0	2	2	Nitriliruptoraceae	1	0	1	2	Roseiflexaceae	0	0	2	2
194						Vibrionaceae	0	0	2	2	Paludibacteraceae	1	0	1	2	Rubritaleaceae	0	0	2	2
195						Vulgatibacteraceae	0	0	2	2	Paracaedibacteraceae	1	0	1	2	Saccharimonadaceae	0	0	2	2
196						W5053	0	0	2	2	Roseiflexaceae	1	0	1	2	Sanguibacteraceae	0	0	2	2
197						Yersiniaceae	0	0	2	2	Saccharofermentans	1	0	1	2	Saprospiraceae	0	0	2	2
198						[Clostridium] methylpentosum group	0	0	1	1	Silvanigrellaceae	1	0	1	2	Solimonadaceae	0	0	2	2
199						A4b	0	0	1	1	Streptosporangiales Incertae Sedis	1	0	1	2	Streptosporangiales Incertae Sedis	0	0	2	2
200						AB1	0	0	1	1	AB1	1	0	0	1	Sumerlaeaceae	0	0	2	2
201						Aeromonadaceae	0	0	1	1	Abditibacteriaceae	1	0	0	1	Symbiobacteraceae	0	0	2	2
202						AKAU3644	0	0	1	1	AKAU3644	1	0	0	1	Tissierella	0	0	2	2
203						Amoebophilaceae	0	0	1	1	Amoebophilaceae	1	0	0	1	vadinBE97	0	0	2	2
204						Anaerococcus	0	0	1	1	Anaerofustaceae	1	0	0	1	W5053	0	0	2	2
205						B1-7BS	0	0	1	1	Armatimonadaceae	1	0	0	1	AKAU3644	0	0	1	1
206						Bacteroidales BS11 gut group	0	0	1	1	Bradymonadaceae	1	0	0	1	AKYG1722	0	0	1	1
207						Bacteroidales UCG-001	0	0	1	1	Caedibacteraceae	1	0	0	1	Alkalibacteraceae	0	0	1	1
208						Barnesiellaceae	0	0	1	1	Catellicoccaceae	1	0	0	1	Amoebophilaceae	0	0	1	1
209						BBMC-4	0	0	1	1	Chitinimonadaceae	1	0	0	1	Ardenticatenaceae	0	0	1	1
210						Brevibacillaceae	0	0	1	1	Cyanobiaceae	1	0	0	1	B1-7BS	0	0	1	1
211						Catellicoccaceae	0	0	1	1	Dermacoccaceae	1	0	0	1	Bacteroidales BS11 gut group	0	0	1	1
212						Crocinitomicaceae	0	0	1	1	Desulfitobacteriaceae	1	0	0	1	Bacteroidales UCG-001	0	0	1	1
213						Cryomorphaceae	0	0	1	1	Dongiaceae	1	0	0	1	Brevibacillaceae	0	0	1	1
214						Cryptosporangiaceae	0	0	1	1	Frankiaceae	1	0	0	1	Caldilineaceae	0	0	1	1
215						cvE6	0	0	1	1	Halanaerobiaceae	1	0	0	1	Chloroflexaceae	0	0	1	1
216						Cyanobiaceae	0	0	1	1	Helicobacteraceae	1	0	0	1	Coriobacteriaceae	0	0	1	1
217						Defluviicoccaceae	0	0	1	1	Labraceae	1	0	0	1	cvE6	0	0	1	1
218						Dermacoccaceae	0	0	1	1	M2PB4-65 termite group	1	0	0	1	Cyanobiaceae	0	0	1	1
219						Desulfitobacteriaceae	0	0	1	1	Methylomonadaceae	1	0	0	1	D05-2	0	0	1	1
220						Ercella	0	0	1	1	Methylopilaceae	1	0	0	1	Dermatophilaceae	0	0	1	1
221						Gallicola	0	0	1	1	ML635J-40 aquatic group	1	0	0	1	Desulfocapsaceae	0	0	1	1
222						Guggenheimella	0	0	1	1	Nitrincolaceae	1	0	0	1	Desulfomicrobiaceae	0	0	1	1
223						Hahellaceae	0	0	1	1	Nodosilineaceae	1	0	0	1	Dongiaceae	0	0	1	1
224						Hyphomicrobiaceae	0	0	1	1	Obscuribacteraceae	1	0	0	1	Endomicrobiaceae	0	0	1	1
225						Hyphomonadaceae	0	0	1	1	Orbaceae	1	0	0	1	Ercella	0	0	1	1
226						Inquilinaceae	0	0	1	1	Piscirickettsiaceae	1	0	0	1	Ethanoligenenaceae	0	0	1	1
227						Kiloniellaceae	0	0	1	1	Porphyromonadaceae	1	0	0	1	Ezakiella	0	0	1	1
228						Labraceae	0	0	1	1	Procabacteriaceae	1	0	0	1	Garciellaceae	0	0	1	1
229						Leptospiraceae	0	0	1	1	Puniceicoccaceae	1	0	0	1	Guggenheimella	0	0	1	1
230						Leptotrichiaceae	0	0	1	1	Rubinisphaeraceae	1	0	0	1	Hahellaceae	0	0	1	1
231						M2PB4-65 termite group	0	0	1	1	Saccharospirillaceae	1	0	0	1	Halanaerobiaceae	0	0	1	1
232						Marinococcaceae	0	0	1	1	Sulfurovaceae	1	0	0	1	Helcococcus	0	0	1	1
233						Morganellaceae	0	0	1	1	Synergistaceae	1	0	0	1	Hyphomicrobiaceae	0	0	1	1
234						Murdochiella	0	0	1	1	Tepidisphaeraceae	1	0	0	1	Jonesiaceae	0	0	1	1
235						Nitrincolaceae	0	0	1	1	Thermosynechococcaceae	1	0	0	1	Limnochordaceae	0	0	1	1
236						NS11-12 marine group	0	0	1	1	Thioalkalibacteraceae	1	0	0	1	M2PB4-65 termite group	0	0	1	1
237						Oscillatoriaceae	0	0	1	1	Brevibacteriaceae	0	0	11	11	Marinifilaceae	0	0	1	1
238						p-2534-18B5 gut group	0	0	1	1	Thermoactinomycetaceae	0	0	9	9	Methylophagaceae	0	0	1	1
239						Paracaedibacteraceae	0	0	1	1	Fastidiosipila	0	0	5	5	Morganellaceae	0	0	1	1
240						Parachlamydiaceae	0	0	1	1	Anaerolineaceae	0	0	4	4	Nannocystaceae	0	0	1	1
241						PeH15	0	0	1	1	Marinobacteraceae	0	0	4	4	Neisseriaceae	0	0	1	1
242						Phycisphaeraceae	0	0	1	1	Rhodothermaceae	0	0	4	4	Nitrincolaceae	0	0	1	1
243						Pleomorphomonadaceae	0	0	1	1	Bacteroidales BS11 gut group	0	0	3	3	Nitrospiraceae	0	0	1	1
244						Polyangiaceae	0	0	1	1	Caldilineaceae	0	0	3	3	NS9 marine group	0	0	1	1
245						Puniceicoccaceae	0	0	1	1	Phycisphaeraceae	0	0	3	3	Oligoflexus	0	0	1	1
246						Reyranellaceae	0	0	1	1	Propionibacteriaceae	0	0	3	3	p-2534-18B5 gut group	0	0	1	1
247						Rhizobiales Incertae Sedis	0	0	1	1	Rhizobiales Incertae Sedis	0	0	3	3	Pectobacteriaceae	0	0	1	1
248						Rhodothermaceae	0	0	1	1	Rhodanobacteraceae	0	0	3	3	Pedosphaeraceae	0	0	1	1
249						Rubinisphaeraceae	0	0	1	1	Ruaniaceae	0	0	3	3	Phaselicystidaceae	0	0	1	1
250						Rubritaleaceae	0	0	1	1	B1-7BS	0	0	2	2	Porphyromonadaceae	0	0	1	1
251						Ruminiclostridium	0	0	1	1	Balneolaceae	0	0	2	2	Procabacteriaceae	0	0	1	1
252						Saccharimonadaceae	0	0	1	1	Bdellovibrionaceae	0	0	2	2	Rhodobiaceae	0	0	1	1
253						Saccharofermentans	0	0	1	1	Desulfobulbaceae	0	0	2	2	Rubinisphaeraceae	0	0	1	1
254						Shewanellaceae	0	0	1	1	Guggenheimella	0	0	2	2	Saccharospirillaceae	0	0	1	1
255						Simkaniaceae	0	0	1	1	Saccharimonadaceae	0	0	2	2	Salisediminibacteriaceae	0	0	1	1
256						Solimonadaceae	0	0	1	1	Sanguibacteraceae	0	0	2	2	SC-I-84	0	0	1	1
257						Streptosporangiales Incertae Sedis	0	0	1	1	Solimonadaceae	0	0	2	2	Shewanellaceae	0	0	1	1
258						Synergistaceae	0	0	1	1	Symbiobacteraceae	0	0	2	2	Silvanigrellaceae	0	0	1	1
259						Syntrophobacteraceae	0	0	1	1	Acidaminobacteraceae	0	0	1	1	Sulfurimonadaceae	0	0	1	1
260						Thermaceae	0	0	1	1	Alkalibacteraceae	0	0	1	1	Sulfurospirillaceae	0	0	1	1
261						Thermomicrobiaceae	0	0	1	1	Babeliaceae	0	0	1	1	Synergistaceae	0	0	1	1
262						Tissierella	0	0	1	1	Bacteroidales UCG-001	0	0	1	1	Syntrophomonadaceae	0	0	1	1
263						Vagococcaceae	0	0	1	1	Brevibacillaceae	0	0	1	1	Tepidisphaeraceae	0	0	1	1
264						Verrucomicrobiaceae	0	0	1	1	Budviciaceae	0	0	1	1	Thermobaculaceae	0	0	1	1
265											Cryptosporangiaceae	0	0	1	1	Thermosynechococcaceae	0	0	1	1
266											Demequinaceae	0	0	1	1	Woeseiaceae	0	0	1	1
267											Desulfomonilaceae	0	0	1	1	Wohlfahrtiimonadaceae	0	0	1	1
268											DEV007	0	0	1	1
269											Elusimicrobiaceae	0	0	1	1
270											env.OPS 17	0	0	1	1
271											Ercella	0	0	1	1
272											FFCH9454	0	0	1	1
273											Fimbriimonadaceae	0	0	1	1
274											Hydrogenoanaerobacterium	0	0	1	1
275											Hyphomonadaceae	0	0	1	1
276											Jonesiaceae	0	0	1	1
277											Kallotenuaceae	0	0	1	1
278											KD3-93	0	0	1	1
279											Ktedonobacteraceae	0	0	1	1
280											Limnochordaceae	0	0	1	1
281											p-251-o5	0	0	1	1
282											Parvibaculaceae	0	0	1	1
283											Pleomorphomonadaceae	0	0	1	1
284											Pyrinomonadaceae	0	0	1	1
285											Salisediminibacteriaceae	0	0	1	1
286											Sandaracinaceae	0	0	1	1
287											SC-I-84	0	0	1	1
288											Shewanellaceae	0	0	1	1
289											SM2D12	0	0	1	1
290											Soehngenia	0	0	1	1
291											Sporolactobacillaceae	0	0	1	1
292											Tissierella	0	0	1	1
293											type III	0	0	1	1
294											UA-50	0	0	1	1
295											Vagococcaceae	0	0	1	1
296											Verrucomicrobiaceae	0	0	1	1
297											Woeseiaceae	0	0	1	1
298											Xiphinematobacteraceae	0	0	1	1
sum		152	75	1022	1249		307	36	3045	3388		2438	5	1721	4164		183	35	3594	3812

## Sheet: Genus
	Northwest					Northeast					Southwest					Southeast
	Genus	rRNA	rDNA	not significant	total ASVs	Genus	rRNA	rDNA	not significant	total ASVs	Genus	rRNA	rDNA	not significant	total ASVs	Genus	rRNA	rDNA	not significant	total ASVs
1	Pseudomonas	12	0	19	31	Sphingomonas	24	0	71	95	Sphingomonas	69	0	28	97	Lactobacillus	10	0	34	44
2	Sphingomonas	7	0	41	48	Paracoccus	14	0	13	27	Lactobacillus	51	0	4	55	Pseudomonas	9	0	36	45
3	Rubellimicrobium	7	1	9	17	Adhaeribacter	10	0	42	52	Bacteroides	50	0	15	65	Sphingomonas	8	0	74	82
4	Paracoccus	5	1	17	23	Hymenobacter	10	0	25	35	Pseudomonas	42	0	6	48	Corynebacterium	8	0	30	38
5	Lactobacillus	4	0	23	27	Rubellimicrobium	9	0	20	29	Paracoccus	29	0	2	31	[Ruminococcus] torques group	8	0	13	21
6	Devosia	4	0	10	14	Skermanella	7	0	12	19	Corynebacterium	28	0	14	42	Bacteroides	7	0	56	63
7	Deinococcus	4	1	9	14	Pseudomonas	6	0	36	42	Hymenobacter	28	0	8	36	Paracoccus	6	0	19	25
8	Cellulomonas	4	0	8	12	Roseomonas	6	0	22	28	UCG-005	27	0	7	34	Streptomyces	6	0	18	24
9	Corynebacterium	3	0	11	14	Devosia	6	1	14	21	Rubellimicrobium	26	0	3	29	Methylobacterium-Methylorubrum	6	0	8	14
10	Hymenobacter	3	0	6	9	Acinetobacter	5	0	11	16	Rikenellaceae RC9 gut group	25	0	22	47	Devosia	4	0	15	19
11	Novosphingobium	3	0	6	9	Aureimonas	5	0	7	12	Deinococcus	25	0	9	34	UCG-005	3	0	34	37
12	Nocardioides	2	4	15	21	Solirubrobacter	4	0	33	37	Christensenellaceae R-7 group	23	0	35	58	Rubellimicrobium	3	0	24	27
13	Kocuria	2	0	10	12	Deinococcus	4	0	19	23	Adhaeribacter	23	0	7	30	Acinetobacter	3	0	16	19
14	Methylobacterium-Methylorubrum	2	0	8	10	Craurococcus-Caldovatus	4	0	16	20	Nocardioides	22	0	39	61	Faecalibacterium	3	0	11	14
15	Chryseobacterium	2	0	6	8	Cellulomonas	4	0	15	19	Roseomonas	22	0	1	23	Incertae Sedis	3	0	11	14
16	Altererythrobacter	2	0	4	6	Pedobacter	4	0	11	15	Acinetobacter	21	0	1	22	Lachnoclostridium	3	0	7	10
17	Edaphobaculum	2	0	4	6	Novosphingobium	4	0	10	14	Streptomyces	20	0	10	30	Erysipelatoclostridium	3	0	4	7
18	Brevundimonas	2	0	3	5	Psychroglaciecola	4	0	10	14	Alistipes	20	0	9	29	Megamonas	3	0	2	5
19	Pseudokineococcus	2	0	2	4	Brevundimonas	4	0	9	13	[Ruminococcus] torques group	20	0	4	24	Staphylococcus	3	0	2	5
20	Roseomonas	2	0	2	4	Methylobacterium-Methylorubrum	4	0	5	9	Chryseobacterium	19	0	4	23	Streptococcus	3	0	2	5
21	Solirubrobacter	2	0	2	4	Bryobacter	4	0	1	5	Devosia	18	0	1	19	Alistipes	2	0	25	27
22	Arthrobacter	2	0	1	3	Lactobacillus	3	0	20	23	Lysobacter	17	0	4	21	Clostridium sensu stricto 1	2	0	20	22
23	Craurococcus-Caldovatus	2	0	1	3	Altererythrobacter	3	0	17	20	Clostridium sensu stricto 1	16	0	4	20	Altererythrobacter	2	0	16	18
24	Qipengyuania	2	0	1	3	Ellin6055	3	0	13	16	Flavobacterium	15	0	7	22	Colidextribacter	2	0	5	7
25	Skermanella	2	0	1	3	Rhodocytophaga	3	0	10	13	Microvirga	15	0	7	22	Intestinimonas	2	0	5	7
26	Kineosphaera	2	0	0	2	YC-ZSS-LKJ147	3	0	9	12	Faecalibacterium	15	0	3	18	[Eubacterium] hallii group	2	0	4	6
27	Saccharibacillus	2	0	0	2	Atopostipes	3	0	6	9	Novosphingobium	14	0	5	19	Subdoligranulum	2	0	3	5
28	Tianweitania	2	0	0	2	Belnapia	3	0	5	8	Massilia	14	0	2	16	Fusobacterium	2	0	2	4
29	Acinetobacter	1	1	22	24	Corynebacterium	2	0	29	31	Ellin6055	13	0	7	20	Weissella	2	0	1	3
30	Bacteroides	1	0	14	15	Microvirga	2	0	28	30	Oceanobacillus	13	0	7	20	Campylobacter	2	0	0	2
31	Massilia	1	1	11	13	Streptomyces	2	0	24	26	Blautia	13	0	4	17	Neorhizobium	2	0	0	2
32	Bacillus	1	0	8	9	Candidatus Alysiosphaera	2	0	8	10	NK4A214 group	13	0	4	17	Adhaeribacter	1	0	46	47
33	Flavobacterium	1	1	8	10	Psychrobacter	2	0	5	7	Pedobacter	13	0	4	17	Solirubrobacter	1	0	28	29
34	Aureimonas	1	1	7	9	Subdoligranulum	2	0	5	7	Skermanella	13	0	2	15	Deinococcus	1	0	22	23
35	Geodermatophilus	1	0	7	8	Romboutsia	2	0	4	6	Aureimonas	12	0	1	13	Pedobacter	1	0	19	20
36	Ellin6055	1	0	5	6	Leptolyngbya EcFYyyy-00	2	0	3	5	Incertae Sedis	12	0	1	13	Skermanella	1	0	13	14
37	Atopococcus	1	0	4	5	Longimicrobium	2	0	3	5	Ruminococcus	11	0	13	24	Blautia	1	0	12	13
38	Megamonas	1	0	4	5	Streptococcus	2	0	3	5	Cellulomonas	11	0	8	19	Aureimonas	1	0	11	12
39	Quadrisphaera	1	0	4	5	Alkanindiges	2	0	1	3	Brevundimonas	11	0	4	15	Dietzia	1	0	7	8
40	Streptococcus	1	0	3	4	Frigoribacterium	2	0	1	3	Arcticibacter	11	0	2	13	Butyricicoccus	1	0	5	6
41	UCG-005	1	0	3	4	Fusobacterium	2	0	1	3	Methylobacterium-Methylorubrum	11	0	0	11	Jeotgalicoccus	1	0	5	6
42	Amaricoccus	1	0	2	3	Neorhizobium	2	0	1	3	Pseudonocardia	10	0	12	22	Phenylobacterium	1	0	5	6
43	Leuconostoc	1	0	2	3	Pseudactinotalea	2	0	1	3	Prevotella	10	0	11	21	Agathobacter	1	0	4	5
44	Luteimonas	1	0	2	3	Tianweitania	2	0	1	3	Solirubrobacter	10	0	8	18	Brachybacterium	1	0	4	5
45	Terribacillus	1	0	2	3	[Agitococcus] lubricus group	2	0	0	2	Altererythrobacter	10	0	7	17	Citricoccus	1	0	4	5
46	Turicibacter	1	0	2	3	Lautropia	2	0	0	2	Paenibacillus	10	0	7	17	Romboutsia	1	0	4	5
47	Actinophytocola	1	0	1	2	Leptolyngbya Es-Yyy1000	2	0	0	2	Cnuella	10	0	4	14	Bifidobacterium	1	0	3	4
48	Aurantimonas	1	0	1	2	Rubrobacter	1	2	24	27	Kocuria	10	0	1	11	Lautropia	1	0	3	4
49	Empedobacter	1	0	1	2	Pseudonocardia	1	0	22	23	Noviherbaspirillum	9	0	5	14	Phascolarctobacterium	1	0	3	4
50	Erythrobacter	1	0	1	2	Marmoricola	1	0	19	20	Lachnoclostridium	9	0	4	13	Ramlibacter	1	0	3	4
51	Jeotgalibaca	1	0	1	2	Oceanobacillus	1	0	19	20	Allorhizobium-Neorhizobium-Pararhizobium-Rhizobium	9	0	1	10	Yaniella	1	0	3	4
52	Lactococcus	1	0	1	2	[Ruminococcus] torques group	1	0	14	15	Marvinbryantia	9	0	1	10	Aurantimonas	1	0	2	3
53	Micrococcus	1	0	1	2	Georgenia	1	1	14	16	Butyricicoccus	9	0	0	9	CAG-56	1	0	2	3
54	Negativibacillus	1	0	1	2	Prevotella	1	0	14	15	Treponema	8	0	4	12	Eisenbergiella	1	0	2	3
55	Noviherbaspirillum	1	0	1	2	Salinimicrobium	1	0	14	15	Prevotellaceae UCG-001	8	0	3	11	Facklamia	1	0	2	3
56	Ornithinimicrobium	1	0	1	2	Arcticibacter	1	0	13	14	Virgibacillus	8	0	3	11	Frigoribacterium	1	0	2	3
57	Pseudactinotalea	1	0	1	2	Lysobacter	1	0	13	14	Anaerosporobacter	8	0	2	10	Proteiniphilum	1	0	2	3
58	Psychrobacillus	1	0	1	2	Noviherbaspirillum	1	0	13	14	Actinomycetospora	8	0	1	9	Aerococcus	1	0	1	2
59	Solibacillus	1	0	1	2	Quadrisphaera	1	1	13	15	Erysipelatoclostridium	8	0	1	9	GCA-900066575	1	0	1	2
60	Williamsia	1	0	1	2	Faecalibacterium	1	0	12	13	Flavisolibacter	7	0	11	18	Helicobacter	1	0	1	2
61	Aquabacterium	1	0	0	1	Gemmatimonas	1	1	11	13	Georgenia	7	0	11	18	Negativibacillus	1	0	1	2
62	Arsenicicoccus	1	0	0	1	Segetibacter	1	0	11	12	Rubrobacter	7	0	7	14	Pseudorhizobium	1	0	1	2
63	Blautia	1	1	0	2	Flavobacterium	1	0	10	11	Halomonas	7	0	3	10	Shimazuella	1	0	1	2
64	Fulvimarina	1	0	0	1	Roseisolibacter	1	0	10	11	Actinoplanes	7	0	2	9	Shinella	1	0	1	2
65	Gemella	1	0	0	1	Allorhizobium-Neorhizobium-Pararhizobium-Rhizobium	1	0	9	10	Psychrobacter	7	0	2	9	Bradyrhizobium	1	0	0	1
66	Herbiconiux	1	0	0	1	Kocuria	1	1	9	11	Oscillibacter	7	0	1	8	CHKCI001	1	0	0	1
67	Janthinobacterium	1	0	0	1	Ornithinimicrobium	1	0	9	10	Phenylobacterium	7	0	1	8	Clostridioides	1	0	0	1
68	Longimicrobium	1	0	0	1	Aeromicrobium	1	0	8	9	YC-ZSS-LKJ147	7	0	1	8	Escherichia-Shigella	1	0	0	1
69	Marisediminicola	1	0	0	1	Flaviaesturariibacter	1	0	8	9	Belnapia	7	0	0	7	Falsirhodobacter	1	0	0	1
70	Mesorhizobium	1	0	0	1	Nibribacter	1	0	7	8	Intestinimonas	7	0	0	7	Frondihabitans	1	0	0	1
71	Microcoleus PCC-7113	1	0	0	1	Ruminococcus	1	0	7	8	Roseisolibacter	7	0	0	7	NA107_(Lachnospiraceae)	1	0	0	1
72	MN 122.2a	1	0	0	1	Anaerosporobacter	1	0	6	7	Alloprevotella	6	0	9	15	NA113_(Ruminococcaceae)	1	0	0	1
73	NA15_(Marinococcaceae)	1	0	0	1	Blastocatella	1	0	6	7	Enteractinococcus	6	0	8	14	NA14_(Lachnospiraceae)	1	0	0	1
74	NA184_(Rhizobiaceae)	1	0	0	1	Chryseobacterium	1	0	6	7	Marmoricola	6	0	8	14	NA16_(Ruminococcaceae)	1	0	0	1
75	NA203_(Pasteurellaceae)	1	0	0	1	Lysinibacillus	1	0	6	7	Colidextribacter	6	0	3	9	NA20_(Lachnospiraceae)	1	0	0	1
76	NA286_(Sphingomonadaceae)	1	0	0	1	Blautia	1	0	5	6	Lysinibacillus	6	0	3	9	NA26_(Ruminococcaceae)	1	0	0	1
77	NA36_(Chroococcidiopsaceae)	1	0	0	1	Colidextribacter	1	0	5	6	Roseburia	6	0	3	9	NA37_(Rhodobacteraceae)	1	0	0	1
78	NA473_(Cellulomonadaceae)	1	0	0	1	Conexibacter	1	0	5	6	Caulobacter	6	0	2	8	NA370_(Anaerococcus)	1	0	0	1
79	NA91_(Microbacteriaceae)	1	0	0	1	Luteimonas	1	0	5	6	Flaviaesturariibacter	6	0	2	8	NA42_(Oscillospiraceae)	1	0	0	1
80	Neisseria	1	0	0	1	Rhodococcus	1	0	5	6	[Eubacterium] hallii group	6	0	1	7	NA46_(Erysipelotrichaceae)	1	0	0	1
81	Pediococcus	1	0	0	1	Citricoccus	1	0	4	5	Fournierella	6	0	0	6	NA47_(Bacillaceae)	1	0	0	1
82	Phenylobacterium	1	0	0	1	Klenkia	1	0	4	5	Megamonas	6	0	0	6	NA65_(Ruminococcaceae)	1	0	0	1
83	Prauserella	1	1	0	2	PMMR1	1	0	4	5	Romboutsia	6	0	0	6	NA69_(Lachnospiraceae)	1	0	0	1
84	Roseisolibacter	1	0	0	1	Sphingoaurantiacus	1	0	4	5	Geodermatophilus	5	0	13	18	NA89_(Lachnospiraceae)	1	0	0	1
85	Saccharomonospora	1	0	0	1	Alkalibacterium	1	0	3	4	Bacillus	5	0	12	17	Paeniclostridium	1	0	0	1
86	Salmonella	1	0	0	1	Caulobacter	1	0	3	4	Sphingobacterium	5	0	9	14	Pediococcus	1	0	0	1
87	Sphingopyxis	1	0	0	1	Cesiribacter	1	0	3	4	Truepera	5	0	6	11	Pseudoflavonifractor	1	0	0	1
88	Synergistes	1	0	0	1	Crinalium SAG 22.89	1	0	3	4	Aeromicrobium	5	0	5	10	Rathayibacter	1	0	0	1
89	Veillonella	1	0	0	1	Kineococcus	1	0	3	4	Gemmatimonas	5	0	4	9	UCG-007	1	0	0	1
90	Xylophilus	1	0	0	1	Kurthia	1	0	3	4	Peredibacter	5	0	4	9	Viridibacillus	1	0	0	1
91	Streptomyces	0	0	10	10	Phenylobacterium	1	0	3	4	Anaerostipes	5	0	3	8	Nocardioides	0	2	58	60
92	Pedobacter	0	1	9	10	Spirosoma	1	0	3	4	Dietzia	5	0	3	8	Christensenellaceae R-7 group	0	0	54	54
93	[Ruminococcus] torques group	0	0	8	8	Sumerlaea	1	0	3	4	Dyadobacter	5	0	3	8	Rikenellaceae RC9 gut group	0	1	45	46
94	Clostridium sensu stricto 1	0	0	8	8	Geminicoccus	1	0	2	3	Pseudactinotalea	5	0	2	7	Microvirga	0	0	31	31
95	Georgenia	0	0	8	8	Negativibacillus	1	0	2	3	Steroidobacter	5	0	2	7	Geodermatophilus	0	0	26	26
96	Blastococcus	0	0	7	7	Qipengyuania	1	0	2	3	Atopococcus	5	0	1	6	Flavisolibacter	0	0	23	23
97	Brevibacterium	0	1	6	7	Aurantimonas	1	0	1	2	Prevotellaceae UCG-003	5	0	1	6	Craurococcus-Caldovatus	0	0	22	22
98	Paenibacillus	0	1	6	7	Caenimonas	1	0	1	2	Ramlibacter	5	0	1	6	Nocardiopsis	0	0	21	21
99	Allorhizobium-Neorhizobium-Pararhizobium-Rhizobium	0	0	6	6	Campylobacter	1	0	1	2	Brachybacterium	5	0	0	5	Roseomonas	0	0	21	21
100	Domibacillus	0	0	6	6	Falsirhodobacter	1	0	1	2	Mucilaginibacter	5	0	0	5	Ruminococcus	0	0	21	21
101	Lysinibacillus	0	0	6	6	Fermentimonas	1	0	1	2	Saccharibacillus	5	0	0	5	Prevotella	0	0	20	20
102	Microvirga	0	0	6	6	Flavitalea	1	0	1	2	Mycobacterium	4	0	9	13	Sphingobacterium	0	0	20	20
103	Pseudonocardia	0	0	6	6	Loriellopsis LF-B5	1	0	1	2	Gaiella	4	0	8	12	Oceanobacillus	0	0	19	19
104	Faecalibacterium	0	1	5	6	Piscinibacter	1	0	1	2	Iamia	4	0	6	10	Bacillus	0	0	18	18
105	Actinomycetospora	0	0	5	5	Bradyrhizobium	1	0	0	1	Bifidobacterium	4	0	5	9	Cellulomonas	0	0	18	18
106	Adhaeribacter	0	0	5	5	CENA518	1	0	0	1	Domibacillus	4	0	5	9	Flavobacterium	0	0	18	18
107	Cnuella	0	0	5	5	Corallococcus	1	0	0	1	Craurococcus-Caldovatus	4	0	4	8	Pseudonocardia	0	0	17	17
108	Dyadobacter	0	0	5	5	Corticibacterium	1	0	0	1	Lachnospiraceae AC2044 group	4	0	4	8	Roseisolibacter	0	0	17	17
109	Enterococcus	0	0	5	5	Friedmanniella	1	0	0	1	Modestobacter	4	0	4	8	Hymenobacter	0	0	16	16
110	Modestobacter	0	0	5	5	Microcoleus PCC-7113	1	0	0	1	Psychroglaciecola	4	0	3	7	Blastococcus	0	0	15	15
111	Marmoricola	0	1	4	5	NA1031_(Sphingomonadaceae)	1	0	0	1	Subdoligranulum	4	0	3	7	Lysobacter	0	0	15	15
112	Nocardiopsis	0	1	4	5	NA1154_(Isosphaeraceae)	1	0	0	1	Agathobacter	4	0	2	6	Georgenia	0	1	14	15
113	Salinicoccus	0	1	4	5	NA131_(Isosphaeraceae)	1	0	0	1	Amaricoccus	4	0	2	6	Marmoricola	0	1	14	15
114	Aliterella	0	0	4	4	NA1532_(Geminicoccaceae)	1	0	0	1	Glycomyces	4	0	2	6	Arcticibacter	0	0	14	14
115	Belnapia	0	0	4	4	NA178_(Beijerinckiaceae)	1	0	0	1	Cellvibrio	4	0	1	5	Ellin6055	0	0	14	14
116	Glutamicibacter	0	0	4	4	NA1937_(JG30-KF-CM45)	1	0	0	1	Nakamurella	4	0	1	5	Massilia	0	0	14	14
117	Lachnoclostridium	0	0	4	4	NA2103_(Tepidisphaeraceae)	1	0	0	1	Ornithinibacillus	4	0	1	5	Quadrisphaera	0	0	14	14
118	Mycobacterium	0	0	4	4	NA211_(Chroococcidiopsaceae)	1	0	0	1	Rheinheimera	4	0	1	5	Rubrobacter	0	0	14	14
119	Planococcus	0	0	4	4	NA22_(Beijerinckiaceae)	1	0	0	1	Shuttleworthia	4	0	1	5	Saccharopolyspora	0	0	14	14
120	Psychrobacter	0	0	4	4	NA234_(Caulobacteraceae)	1	0	0	1	Sphingoaurantiacus	4	0	1	5	Segetibacter	0	0	14	14
121	Rhodococcus	0	0	4	4	NA2685_(Gemmataceae)	1	0	0	1	Arcobacter	4	0	0	4	Allorhizobium-Neorhizobium-Pararhizobium-Rhizobium	0	0	13	13
122	Spirosoma	0	0	4	4	NA27_(Beijerinckiaceae)	1	0	0	1	Aridibacter	4	0	0	4	Chryseobacterium	0	0	13	13
123	Stenotrophomonas	0	0	4	4	NA272_(Beijerinckiaceae)	1	0	0	1	CAG-352	4	0	0	4	NK4A214 group	0	0	13	13
124	Atopostipes	0	1	3	4	NA278_(Rhizobiaceae)	1	0	0	1	CAG-56	4	0	0	4	Psychroglaciecola	0	0	13	13
125	Butyricicoccus	0	2	3	5	NA3_(Planococcaceae)	1	0	0	1	Catenibacillus	4	0	0	4	Treponema	0	0	13	13
126	Rheinheimera	0	1	3	4	NA313_(Geminicoccaceae)	1	0	0	1	Citricoccus	4	0	0	4	Truepera	0	0	13	13
127	Aeromicrobium	0	0	3	3	NA328_(D05-2)	1	0	0	1	Enterococcus	4	0	0	4	Enteractinococcus	0	0	12	12
128	Alistipes	0	0	3	3	NA344_(Blastocatellaceae)	1	0	0	1	Longimicrobium	4	0	0	4	Kocuria	0	0	12	12
129	Arcticibacter	0	0	3	3	NA36_(Chroococcidiopsaceae)	1	0	0	1	Nibribacter	4	0	0	4	Monoglobus	0	0	12	12
130	Brachybacterium	0	0	3	3	NA37_(Rhodobacteraceae)	1	0	0	1	Ruminobacter	4	0	0	4	Stenotrophomonas	0	0	12	12
131	Cellvibrio	0	0	3	3	NA412_(Isosphaeraceae)	1	0	0	1	Sutterella	4	0	0	4	Noviherbaspirillum	0	1	11	12
132	Dietzia	0	0	3	3	NA415_(Isosphaeraceae)	1	0	0	1	Yaniella	4	0	0	4	Bryobacter	0	0	11	11
133	Exiguobacterium	0	0	3	3	NA432_(JG30-KF-CM45)	1	0	0	1	Saccharopolyspora	3	0	11	14	Cnuella	0	0	11	11
134	Flavisolibacter	0	0	3	3	NA453_(Rhodobacteraceae)	1	0	0	1	Blastococcus	3	0	10	13	Novosphingobium	0	0	11	11
135	Gracilibacillus	0	0	3	3	NA535_(Rhodobacteraceae)	1	0	0	1	Quadrisphaera	3	0	9	12	Psychrobacter	0	0	11	11
136	Jeotgalicoccus	0	0	3	3	NA54_(Rhodobacteraceae)	1	0	0	1	Salinicoccus	3	0	8	11	Salinicoccus	0	0	11	11
137	Mucilaginibacter	0	0	3	3	NA606_(Sphingomonadaceae)	1	0	0	1	Atopostipes	3	0	7	10	Salinimicrobium	0	0	11	11
138	Oxalicibacterium	0	0	3	3	NA617_(Geminicoccaceae)	1	0	0	1	Monoglobus	3	0	7	10	Alloprevotella	0	0	10	10
139	Rhodocytophaga	0	0	3	3	NA673_(Chroococcidiopsaceae)	1	0	0	1	Ornithinimicrobium	3	0	6	9	Atopostipes	0	0	10	10
140	Rikenellaceae RC9 gut group	0	0	3	3	NA776_(Sphingomonadaceae)	1	0	0	1	Sporosarcina	3	0	5	8	Brevibacterium	0	0	10	10
141	Sphingobacterium	0	0	3	3	NA796_(Oligoflexus)	1	0	0	1	Agromyces	3	0	4	7	Modestobacter	0	0	10	10
142	Sphingobium	0	0	3	3	NA806_(Myxococcaceae)	1	0	0	1	Leucobacter	3	0	4	7	Ornithinimicrobium	0	0	10	10
143	Staphylococcus	0	0	3	3	NA851_(WD2101 soil group)	1	0	0	1	Solibacillus	3	0	4	7	Prevotellaceae UCG-001	0	0	10	10
144	Subgroup 10	0	0	3	3	NA982_(WD2101 soil group)	1	0	0	1	Conexibacter	3	0	3	6	Virgibacillus	0	0	10	10
145	Thermobifida	0	0	3	3	Neo-b11	1	0	0	1	Cytophaga	3	0	3	6	Aeromicrobium	0	2	9	11
146	Weissella	0	0	3	3	Nitrobacter	1	0	0	1	Garicola	3	0	3	6	Mycobacterium	0	2	9	11
147	Abditibacterium	0	1	2	3	Nodosilinea PCC-7104	1	0	0	1	Jeotgalicoccus	3	0	3	6	Actinoplanes	0	0	9	9
148	Aminobacter	0	1	2	3	Nostoc PCC-73102	1	0	0	1	Rhodococcus	3	0	3	6	Brevundimonas	0	0	9	9
149	Enteractinococcus	0	1	2	3	Puia	1	0	0	1	Salinimicrobium	3	0	3	6	Cellvibrio	0	0	9	9
150	Oceanobacillus	0	1	2	3	Rathayibacter	1	0	0	1	Segetibacter	3	0	3	6	Domibacillus	0	0	9	9
151	Prevotellaceae UCG-001	0	1	2	3	Rivicola	1	0	0	1	Streptococcus	3	0	3	6	Gemmatimonas	0	0	9	9
152	Virgibacillus	0	1	2	3	Serinicoccus	1	0	0	1	Alkalibacterium	3	0	2	5	Lysinibacillus	0	0	9	9
153	Aerococcus	0	0	2	2	Succinivibrionaceae UCG-001	1	0	0	1	Barnesiella	3	0	2	5	Nibribacter	0	0	9	9
154	Arcobacter	0	0	2	2	Nocardioides	0	3	58	61	Bryobacter	3	0	2	5	Paenibacillus	0	0	9	9
155	Bogoriella	0	0	2	2	Bacteroides	0	0	37	37	Haliangium	3	0	2	5	Atopococcus	0	0	8	8
156	Bosea	0	0	2	2	Christensenellaceae R-7 group	0	0	31	31	Nannocystis	3	0	2	5	Flaviaesturariibacter	0	0	8	8
157	CAG-56	0	0	2	2	Geodermatophilus	0	0	26	26	Nitrosospira	3	0	2	5	Gaiella	0	0	8	8
158	Caulobacter	0	0	2	2	Rikenellaceae RC9 gut group	0	0	25	25	Parasutterella	3	0	2	5	Halomonas	0	0	8	8
159	Cellulosimicrobium	0	0	2	2	Flavisolibacter	0	1	21	22	Phascolarctobacterium	3	0	2	5	Sporosarcina	0	0	8	8
160	Christensenellaceae R-7 group	0	0	2	2	UCG-005	0	2	20	22	Staphylococcus	3	0	2	5	Subgroup 10	0	0	8	8
161	Curtobacterium	0	0	2	2	Nocardiopsis	0	0	18	18	Actinophytocola	3	0	1	4	Tumebacillus	0	0	8	8
162	Falsirhodobacter	0	0	2	2	Clostridium sensu stricto 1	0	0	15	15	Actinotalea	3	0	1	4	Arthrobacter	0	1	7	8
163	Fusobacterium	0	0	2	2	Truepera	0	0	15	15	Alkanindiges	3	0	1	4	Anaerosporobacter	0	0	7	7
164	GCA-900066575	0	0	2	2	Blastococcus	0	2	14	16	Cellulosimicrobium	3	0	1	4	Candidatus Alysiosphaera	0	0	7	7
165	Gemmatimonas	0	0	2	2	Massilia	0	1	14	15	CHKCI002	3	0	1	4	Dorea	0	0	7	7
166	Haemophilus	0	0	2	2	Cnuella	0	0	13	13	Flavonifractor	3	0	1	4	Luteimonas	0	0	7	7
167	Iamia	0	0	2	2	Mycobacterium	0	0	13	13	Frisingicoccus	3	0	1	4	Prevotellaceae UCG-003	0	0	7	7
168	Isoptericola	0	0	2	2	Sphingobacterium	0	0	13	13	Fusobacterium	3	0	1	4	Roseburia	0	0	7	7
169	Kineococcus	0	0	2	2	Bacillus	0	1	12	13	Limnobacter	3	0	1	4	[Eubacterium] brachy group	0	0	6	6
170	Klebsiella	0	0	2	2	Alistipes	0	0	12	12	Negativibacillus	3	0	1	4	Actinomycetospora	0	0	6	6
171	Kurthia	0	0	2	2	Modestobacter	0	0	11	11	Proteiniphilum	3	0	1	4	Alkalibacterium	0	0	6	6
172	Legionella	0	0	2	2	Salinicoccus	0	0	11	11	Pseudokineococcus	3	0	1	4	Anaerostipes	0	0	6	6
173	Nakamurella	0	0	2	2	Brevibacterium	0	1	9	10	Pygmaiobacter	3	0	1	4	Conexibacter	0	0	6	6
174	Neorhizobium	0	0	2	2	Saccharopolyspora	0	1	9	10	Qipengyuania	3	0	1	4	Coprococcus	0	0	6	6
175	Nesterenkonia	0	0	2	2	NK4A214 group	0	0	9	9	[Ruminococcus] gauvreauii group	3	0	0	3	Dyadobacter	0	0	6	6
176	NK4A214 group	0	0	2	2	Paenibacillus	0	0	9	9	Anaerovibrio	3	0	0	3	Family XIII AD3011 group	0	0	6	6
177	Novibacillus	0	0	2	2	Parviterribacter	0	0	9	9	Aurantimonas	3	0	0	3	Iamia	0	0	6	6
178	Olsenella	0	0	2	2	Tumebacillus	0	0	9	9	Burkholderia-Caballeronia-Paraburkholderia	3	0	0	3	Lachnospiraceae AC2044 group	0	0	6	6
179	Ornithinicoccus	0	0	2	2	Domibacillus	0	0	8	8	Frigoribacterium	3	0	0	3	Leucobacter	0	0	6	6
180	Paenisporosarcina	0	0	2	2	Stenotrophomonas	0	0	8	8	Galbitalea	3	0	0	3	Ornithinibacillus	0	0	6	6
181	Parviterribacter	0	0	2	2	Treponema	0	0	8	8	Lachnospiraceae NK4A136 group	3	0	0	3	Ornithinicoccus	0	0	6	6
182	Peredibacter	0	0	2	2	Virgibacillus	0	0	8	8	Leuconostoc	3	0	0	3	Oscillibacter	0	0	6	6
183	Piscinibacter	0	0	2	2	Actinomycetospora	0	0	7	7	Micrococcus	3	0	0	3	Parabacteroides	0	0	6	6
184	Planomicrobium	0	0	2	2	Actinoplanes	0	0	7	7	Neorhizobium	3	0	0	3	Planococcus	0	0	6	6
185	Prevotellaceae Ga6A1 group	0	0	2	2	Dietzia	0	0	7	7	Pseudorhizobium	3	0	0	3	Rhodocytophaga	0	0	6	6
186	Pseudarthrobacter	0	0	2	2	Enteractinococcus	0	0	7	7	Salinicola	3	0	0	3	Solibacillus	0	0	6	6
187	Raoultella	0	0	2	2	Iamia	0	0	7	7	Tianweitania	3	0	0	3	UCG-009	0	0	6	6
188	Saccharopolyspora	0	0	2	2	Planococcus	0	0	7	7	Tolumonas	3	0	0	3	Agromyces	0	1	5	6
189	Segetibacter	0	0	2	2	Gaiella	0	1	6	7	Tychonema CCAP 1459-11B	3	0	0	3	[Eubacterium] nodatum group	0	0	5	5
190	Steroidobacter	0	0	2	2	Subgroup 10	0	1	6	7	UCG-008	3	0	0	3	Aliterella	0	0	5	5
191	Sulfurifustis	0	0	2	2	Arthrobacter	0	0	6	6	Weissella	3	0	0	3	Belnapia	0	0	5	5
192	Tychonema CCAP 1459-11B	0	0	2	2	Atopococcus	0	0	6	6	Williamsia	3	0	0	3	CL500-29 marine group	0	0	5	5
193	Yaniella	0	0	2	2	Dyadobacter	0	0	6	6	Nocardiopsis	2	0	18	20	Edaphobaculum	0	0	5	5
194	YC-ZSS-LKJ147	0	0	2	2	Halomonas	0	0	6	6	Stenotrophomonas	2	0	8	10	Glutamicibacter	0	0	5	5
195	Agromyces	0	1	1	2	Monoglobus	0	0	6	6	Chthoniobacter	2	0	7	9	Glycomyces	0	0	5	5
196	Alkalibacterium	0	1	1	2	Ornithinicoccus	0	0	6	6	Family XIII AD3011 group	2	0	6	8	Limnobacter	0	0	5	5
197	Gaiella	0	1	1	2	Peredibacter	0	0	6	6	Prevotellaceae UCG-004	2	0	4	6	Planomicrobium	0	0	5	5
198	Geminicoccus	0	1	1	2	Roseburia	0	0	6	6	Proteiniclasticum	2	0	4	6	Pontibacter	0	0	5	5
199	Leucobacter	0	1	1	2	Saccharibacillus	0	0	6	6	Pseudogracilibacillus	2	0	4	6	Prevotellaceae UCG-004	0	0	5	5
200	Lysobacter	0	1	1	2	Solibacillus	0	0	6	6	Subgroup 10	2	0	4	6	Proteiniclasticum	0	0	5	5
201	Romboutsia	0	1	1	2	Sporosarcina	0	0	6	6	Coprococcus	2	0	3	5	Rhodococcus	0	0	5	5
202	Sporosarcina	0	1	1	2	Dorea	0	1	5	6	Lachnospiraceae UCG-010	2	0	3	5	Ruminobacter	0	0	5	5
203	Thermomonas	0	1	1	2	Jeotgalicoccus	0	1	5	6	Lentibacillus	2	0	3	5	Steroidobacter	0	0	5	5
204	[Eubacterium] brachy group	0	0	1	1	Agathobacter	0	0	5	5	Nesterenkonia	2	0	3	5	YC-ZSS-LKJ147	0	0	5	5
205	[Eubacterium] hallii group	0	0	1	1	Agromyces	0	0	5	5	Oxalicibacterium	2	0	3	5	Acetitomaculum	0	1	4	5
206	Achromobacter	0	0	1	1	Aliterella	0	0	5	5	Parabacteroides	2	0	3	5	Akkermansia	0	1	4	5
207	Acidibacter	0	0	1	1	Bifidobacterium	0	0	5	5	Planomicrobium	2	0	3	5	Oxalicibacterium	0	1	4	5
208	Acidovorax	0	0	1	1	Butyricicoccus	0	0	5	5	[Eubacterium] brachy group	2	0	2	4	Actinophytocola	0	0	4	4
209	Actinomadura	0	0	1	1	Cellvibrio	0	0	5	5	Aeriscardovia	2	0	2	4	Actinotalea	0	0	4	4
210	Actinomyces	0	0	1	1	Chthoniobacter	0	0	5	5	Desulfovibrio	2	0	2	4	Aliicoccus	0	0	4	4
211	Actinotalea	0	0	1	1	Erysipelatoclostridium	0	0	5	5	Fibrobacter	2	0	2	4	Aliidiomarina	0	0	4	4
212	Acuticoccus	0	0	1	1	Glutamicibacter	0	0	5	5	Klenkia	2	0	2	4	Blastocatella	0	0	4	4
213	Aequorivita	0	0	1	1	Incertae Sedis	0	0	5	5	Kurthia	2	0	2	4	CAG-352	0	0	4	4
214	Aeriscardovia	0	0	1	1	Lachnoclostridium	0	0	5	5	Lechevalieria	2	0	2	4	Cellulosilyticum	0	0	4	4
215	Aeromonas	0	0	1	1	Lachnospiraceae NK3A20 group	0	0	5	5	Pir4 lineage	2	0	2	4	Chthoniobacter	0	0	4	4
216	Agaricicola	0	0	1	1	Ornithinibacillus	0	0	5	5	Pontibacter	2	0	2	4	Comamonas	0	0	4	4
217	Akkermansia	0	0	1	1	Prevotellaceae UCG-003	0	0	5	5	Promicromonospora	2	0	2	4	Fibrobacter	0	0	4	4
218	Aliicoccus	0	0	1	1	Sphingobium	0	0	5	5	Rhodocytophaga	2	0	2	4	Flavonifractor	0	0	4	4
219	Aliifodinibius	0	0	1	1	Staphylococcus	0	0	5	5	Sphingobium	2	0	2	4	Garicola	0	0	4	4
220	Alishewanella	0	0	1	1	Acetitomaculum	0	0	4	4	Anaerobiospirillum	2	0	1	3	Geminicoccus	0	0	4	4
221	Alkanindiges	0	0	1	1	Aliicoccus	0	0	4	4	BIyi10	2	0	1	3	Kineococcus	0	0	4	4
222	Alloiococcus	0	0	1	1	Aliidiomarina	0	0	4	4	Blastocatella	2	0	1	3	Klenkia	0	0	4	4
223	Ammoniphilus	0	0	1	1	Alloprevotella	0	0	4	4	Bosea	2	0	1	3	Kurthia	0	0	4	4
224	Anaerofustis	0	0	1	1	Aminobacter	0	0	4	4	CHKCI001	2	0	1	3	Lachnospiraceae UCG-010	0	0	4	4
225	Anoxybacillus	0	0	1	1	Antarcticibacterium	0	0	4	4	Desemzia	2	0	1	3	Lechevalieria	0	0	4	4
226	Arthronema SAG 12.89	0	0	1	1	Azospirillum	0	0	4	4	Duganella	2	0	1	3	Limibaculum	0	0	4	4
227	Aurantisolimonas	0	0	1	1	Family XIII AD3011 group	0	0	4	4	Exiguobacterium	2	0	1	3	Nesterenkonia	0	0	4	4
228	Azohydromonas	0	0	1	1	Lachnospiraceae AC2044 group	0	0	4	4	Ferruginibacter	2	0	1	3	Ohtaekwangia	0	0	4	4
229	Bavariicoccus	0	0	1	1	Lachnospiraceae UCG-010	0	0	4	4	Herpetosiphon	2	0	1	3	OM27 clade	0	0	4	4
230	Bifidobacterium	0	0	1	1	Limnobacter	0	0	4	4	Jeotgalibaca	2	0	1	3	P3OB-42	0	0	4	4
231	Blastocatella	0	0	1	1	Nakamurella	0	0	4	4	Kineococcus	2	0	1	3	Parviterribacter	0	0	4	4
232	Bryobacter	0	0	1	1	Nitrosospira	0	0	4	4	Lachnospiraceae UCG-001	2	0	1	3	Prauserella	0	0	4	4
233	Buchnera	0	0	1	1	Oxalicibacterium	0	0	4	4	Luteolibacter	2	0	1	3	Prevotellaceae NK3B31 group	0	0	4	4
234	Caedibacter	0	0	1	1	P3OB-42	0	0	4	4	Macrococcus	2	0	1	3	Saccharibacillus	0	0	4	4
235	Campylobacter	0	0	1	1	Phascolarctobacterium	0	0	4	4	Mesorhizobium	2	0	1	3	Saccharomonospora	0	0	4	4
236	Candidatus Bacilloplasma	0	0	1	1	Planomicrobium	0	0	4	4	Oscillospira	2	0	1	3	Sphingobium	0	0	4	4
237	Candidatus Megaira	0	0	1	1	Prevotellaceae UCG-001	0	0	4	4	Pajaroellobacter	2	0	1	3	Spirosoma	0	0	4	4
238	Candidatus Vestibaculum	0	0	1	1	Pseudogracilibacillus	0	0	4	4	Pedomicrobium	2	0	1	3	Succinivibrio	0	0	4	4
239	Candidatus Xiphinematobacter	0	0	1	1	Pseudokineococcus	0	0	4	4	Psychrobacillus	2	0	1	3	Sutterella	0	0	4	4
240	Caproiciproducens	0	0	1	1	Ramlibacter	0	0	4	4	Roseimaritima	2	0	1	3	Taibaiella	0	0	4	4
241	Carnobacterium	0	0	1	1	Ruminobacter	0	0	4	4	Sellimonas	2	0	1	3	Thermomonas	0	0	4	4
242	Caryophanon	0	0	1	1	Steroidobacter	0	0	4	4	Stackebrandtia	2	0	1	3	UCG-002	0	0	4	4
243	Catellicoccus	0	0	1	1	Succinivibrio	0	0	4	4	Stenotrophobacter	2	0	1	3	Olsenella	0	1	3	4
244	Cavicella	0	0	1	1	Pontibacter	0	1	3	4	Turicibacter	2	0	1	3	[Ruminococcus] gauvreauii group	0	0	3	3
245	Cereibacter	0	0	1	1	[Eubacterium] hallii group	0	0	3	3	Tuzzerella	2	0	1	3	Acidibacter	0	0	3	3
246	Chroococcidiopsis PCC 7203	0	0	1	1	[Eubacterium] ventriosum group	0	0	3	3	UCG-009	2	0	1	3	Actinomadura	0	0	3	3
247	Chryseomicrobium	0	0	1	1	Abditibacterium	0	0	3	3	[Agitococcus] lubricus group	2	0	0	2	Alcanivorax	0	0	3	3
248	Ciceribacter	0	0	1	1	Actinomadura	0	0	3	3	Aliterella	2	0	0	2	Amaricoccus	0	0	3	3
249	Cloacibacterium	0	0	1	1	Actinophytocola	0	0	3	3	Alkaliflexus	2	0	0	2	Arenimonas	0	0	3	3
250	Clostridioides	0	0	1	1	Actinotalea	0	0	3	3	Alloiococcus	2	0	0	2	Caryophanon	0	0	3	3
251	Cm1-21	0	0	1	1	Ammoniphilus	0	0	3	3	Amnibacterium	2	0	0	2	Defluviitaleaceae UCG-011	0	0	3	3
252	Colidextribacter	0	0	1	1	Amycolatopsis	0	0	3	3	Campylobacter	2	0	0	2	Desemzia	0	0	3	3
253	Comamonas	0	0	1	1	Aridibacter	0	0	3	3	Carnobacterium	2	0	0	2	Desulfovibrio	0	0	3	3
254	Corticibacterium	0	0	1	1	Bdellovibrio	0	0	3	3	Cetobacterium	2	0	0	2	dgA-11 gut group	0	0	3	3
255	Couchioplanes	0	0	1	1	Brachybacterium	0	0	3	3	Constrictibacter	2	0	0	2	Enterococcus	0	0	3	3
256	Coxiella	0	0	1	1	CAG-352	0	0	3	3	Cupriavidus	2	0	0	2	Exiguobacterium	0	0	3	3
257	Cutibacterium	0	0	1	1	Caryophanon	0	0	3	3	Defluviicoccus	2	0	0	2	Flaviflexus	0	0	3	3
258	Dechloromonas	0	0	1	1	Cellulosilyticum	0	0	3	3	Eisenbergiella	2	0	0	2	Fournierella	0	0	3	3
259	Defluviicoccus	0	0	1	1	Desemzia	0	0	3	3	Enhydrobacter	2	0	0	2	Frisingicoccus	0	0	3	3
260	Delftia	0	0	1	1	Edaphobaculum	0	0	3	3	Erythrobacter	2	0	0	2	Galbitalea	0	0	3	3
261	Desemzia	0	0	1	1	Enterococcus	0	0	3	3	Facklamia	2	0	0	2	Isoptericola	0	0	3	3
262	Diplosphaera	0	0	1	1	Erythrobacter	0	0	3	3	Falsirhodobacter	2	0	0	2	Jeotgalibaca	0	0	3	3
263	DTU089	0	0	1	1	Exiguobacterium	0	0	3	3	FFCH7168	2	0	0	2	Knoellia	0	0	3	3
264	Duganella	0	0	1	1	Facklamia	0	0	3	3	Fictibacillus	2	0	0	2	Luteibacter	0	0	3	3
265	Eisenbergiella	0	0	1	1	Ferruginibacter	0	0	3	3	GCA-900066575	2	0	0	2	Macrococcus	0	0	3	3
266	Enhydrobacter	0	0	1	1	Fibrobacter	0	0	3	3	Geminicoccus	2	0	0	2	Marvinbryantia	0	0	3	3
267	Erwinia	0	0	1	1	Flavonifractor	0	0	3	3	Inhella	2	0	0	2	Micrococcus	0	0	3	3
268	Erysipelothrix	0	0	1	1	Garicola	0	0	3	3	Lacticigenium	2	0	0	2	Nakamurella	0	0	3	3
269	Escherichia-Shigella	0	0	1	1	Gordonia	0	0	3	3	Lactococcus	2	0	0	2	Nitrosospira	0	0	3	3
270	Facklamia	0	0	1	1	Gracilibacillus	0	0	3	3	Leptolyngbya Es-Yyy1000	2	0	0	2	Opitutus	0	0	3	3
271	Fermentimonas	0	0	1	1	Haliangium	0	0	3	3	Megasphaera	2	0	0	2	Oxalophagus	0	0	3	3
272	Flaviaesturariibacter	0	0	1	1	Isoptericola	0	0	3	3	Moheibacter	2	0	0	2	Parapusillimonas	0	0	3	3
273	Flaviflexus	0	0	1	1	Jatrophihabitans	0	0	3	3	Muricoccus	2	0	0	2	Patulibacter	0	0	3	3
274	Flectobacillus	0	0	1	1	Jeotgalibaca	0	0	3	3	Myxococcus	2	0	0	2	Pelagibacterium	0	0	3	3
275	Fluviicola	0	0	1	1	Knoellia	0	0	3	3	Nitrosomonas	2	0	0	2	Porphyrobacter	0	0	3	3
276	Fournierella	0	0	1	1	Lachnospiraceae NK4A136 group	0	0	3	3	Pediococcus	2	0	0	2	Prevotellaceae Ga6A1 group	0	0	3	3
277	Franconibacter	0	0	1	1	Lachnospiraceae UCG-001	0	0	3	3	Pelagibacterium	2	0	0	2	Pseudogracilibacillus	0	0	3	3
278	Frigoribacterium	0	0	1	1	Lechevalieria	0	0	3	3	Piscinibacter	2	0	0	2	Pseudokineococcus	0	0	3	3
279	Galbitalea	0	0	1	1	Marinobacter	0	0	3	3	Prevotellaceae Ga6A1 group	2	0	0	2	Psychrobacillus	0	0	3	3
280	Gallionella	0	0	1	1	Marvinbryantia	0	0	3	3	Rhabdobacter	2	0	0	2	Qipengyuania	0	0	3	3
281	Garicola	0	0	1	1	Megamonas	0	0	3	3	Rubritepida	2	0	0	2	Roseimaritima	0	0	3	3
282	Geitlerinema	0	0	1	1	MN 122.2a	0	0	3	3	Salana	2	0	0	2	Ruania	0	0	3	3
283	GWE2-31-10	0	0	1	1	Mogibacterium	0	0	3	3	Scytonema UTEX 2349	2	0	0	2	Saccharothrix	0	0	3	3
284	Haliangium	0	0	1	1	Myxococcus	0	0	3	3	Shinella	2	0	0	2	Serratia	0	0	3	3
285	Haloactinopolyspora	0	0	1	1	Nesterenkonia	0	0	3	3	Siccirubricoccus	2	0	0	2	Sphingoaurantiacus	0	0	3	3
286	Halolactibacillus	0	0	1	1	Nitrospira	0	0	3	3	Veillonella	2	0	0	2	Tianweitania	0	0	3	3
287	Holdemania	0	0	1	1	Oceanicella	0	0	3	3	Dorea	1	0	9	10	Turicibacter	0	0	3	3
288	Hyphococcus	0	0	1	1	Ohtaekwangia	0	0	3	3	Arthrobacter	1	0	5	6	Vibrio	0	0	3	3
289	Hyphomicrobium	0	0	1	1	Olsenella	0	0	3	3	Luteimonas	1	0	5	6	wb1-P19	0	0	3	3
290	Incertae Sedis	0	0	1	1	Oscillibacter	0	0	3	3	Tumebacillus	1	0	5	6	Lachnospiraceae NK3A20 group	0	1	2	3
291	Intestinimonas	0	0	1	1	Parasutterella	0	0	3	3	Acetitomaculum	1	0	4	5	Mogibacterium	0	1	2	3
292	Janibacter	0	0	1	1	Paucisalibacillus	0	0	3	3	Candidatus Alysiosphaera	1	0	4	5	[Eubacterium] siraeum group	0	0	2	2
293	Knoellia	0	0	1	1	Pelagibacterium	0	0	3	3	Planococcus	1	0	4	5	[Eubacterium] ventriosum group	0	0	2	2
294	Lachnospiraceae NK4A136 group	0	0	1	1	Prevotellaceae NK3B31 group	0	0	3	3	[Eubacterium] nodatum group	1	0	3	4	Abditibacterium	0	0	2	2
295	Lachnospiraceae UCG-010	0	0	1	1	Prevotellaceae UCG-004	0	0	3	3	Akkermansia	1	0	3	4	Achromobacter	0	0	2	2
296	Lentibacillus	0	0	1	1	Proteiniclasticum	0	0	3	3	Aliicoccus	1	0	3	4	Aequorivita	0	0	2	2
297	Leptolyngbya PCC-6306	0	0	1	1	Pseudorhizobium	0	0	3	3	Aliidiomarina	1	0	3	4	Alcaligenes	0	0	2	2
298	Luteolibacter	0	0	1	1	Psychrobacillus	0	0	3	3	Cellulosilyticum	1	0	3	4	Algoriphagus	0	0	2	2
299	Lysinimonas	0	0	1	1	Saccharothrix	0	0	3	3	Comamonas	1	0	3	4	Aliihoeflea	0	0	2	2
300	Macrococcus	0	0	1	1	Shuttleworthia	0	0	3	3	dgA-11 gut group	1	0	3	4	Allobaculum	0	0	2	2
301	Marinilactibacillus	0	0	1	1	Terribacillus	0	0	3	3	Edaphobaculum	1	0	3	4	Alloiococcus	0	0	2	2
302	Megasphaera	0	0	1	1	Thermobifida	0	0	3	3	Fluviicola	1	0	3	4	Aminobacter	0	0	2	2
303	Microbacterium	0	0	1	1	Turicibacter	0	0	3	3	Gemmata	1	0	3	4	Amnibacterium	0	0	2	2
304	Microcoleus SAG 1449-1a	0	0	1	1	UCG-002	0	0	3	3	Glutamicibacter	1	0	3	4	Amphibacillus	0	0	2	2
305	Miniimonas	0	0	1	1	wb1-P19	0	0	3	3	Limibaculum	1	0	3	4	Amycolatopsis	0	0	2	2
306	mle1-7	0	0	1	1	Weissella	0	0	3	3	Parviterribacter	1	0	3	4	Anaeroplasma	0	0	2	2
307	MM2	0	0	1	1	Yaniella	0	0	3	3	Succinivibrio	1	0	3	4	Anaerovibrio	0	0	2	2
308	Mobilicoccus	0	0	1	1	[Eubacterium] nodatum group	0	0	2	2	Actinomadura	1	0	2	3	Anaerovorax	0	0	2	2
309	Moraxella	0	0	1	1	[Eubacterium] siraeum group	0	0	2	2	Aequorivita	1	0	2	3	Anoxybacillus	0	0	2	2
310	Motilibacter	0	0	1	1	[Ruminococcus] gauvreauii group	0	0	2	2	Amycolatopsis	1	0	2	3	Arcobacter	0	0	2	2
311	Mucispirillum	0	0	1	1	Achromobacter	0	0	2	2	Bhargavaea	1	0	2	3	Aridibacter	0	0	2	2
312	Myroides	0	0	1	1	Aerococcus	0	0	2	2	Defluviitaleaceae UCG-011	1	0	2	3	Arsenicitalea	0	0	2	2
313	NA101_(Microbacteriaceae)	0	0	1	1	Afifella	0	0	2	2	Knoellia	1	0	2	3	Aureibacillus	0	0	2	2
314	NA103_(Micrococcaceae)	0	0	1	1	Akkermansia	0	0	2	2	Lachnospiraceae UCG-004	1	0	2	3	Azohydromonas	0	0	2	2
315	NA1054_(Moraxellaceae)	0	0	1	1	Amaricoccus	0	0	2	2	Legionella	1	0	2	3	Azospirillum	0	0	2	2
316	NA107_(Lachnospiraceae)	0	0	1	1	Amnibacterium	0	0	2	2	Mailhella	1	0	2	3	Bdellovibrio	0	0	2	2
317	NA1088_(Xanthobacteraceae)	0	0	1	1	Anoxybacillus	0	0	2	2	Marinilactibacillus	1	0	2	3	Bhargavaea	0	0	2	2
318	NA109_(Bacillaceae)	0	0	1	1	Azohydromonas	0	0	2	2	MND1	1	0	2	3	Bogoriella	0	0	2	2
319	NA1092_(67-14)	0	0	1	1	Bhargavaea	0	0	2	2	Olsenella	1	0	2	3	Brumimicrobium	0	0	2	2
320	NA11_(Marinococcaceae)	0	0	1	1	BIyi10	0	0	2	2	Oribacterium	1	0	2	3	Caenimonas	0	0	2	2
321	NA1110_(Barnesiellaceae)	0	0	1	1	Blastopirellula	0	0	2	2	Ornithobacterium	1	0	2	3	Catellicoccus	0	0	2	2
322	NA1115_(Streptomycetaceae)	0	0	1	1	Burkholderia-Caballeronia-Paraburkholderia	0	0	2	2	Paucisalibacillus	1	0	2	3	Caulobacter	0	0	2	2
323	NA1164_(Bacillaceae)	0	0	1	1	Carnobacterium	0	0	2	2	Prevotellaceae NK3B31 group	1	0	2	3	Cellulosimicrobium	0	0	2	2
324	NA1166_(JG30-KF-CM45)	0	0	1	1	Cavicella	0	0	2	2	Reyranella	1	0	2	3	CHKCI002	0	0	2	2
325	NA118_(Chroococcidiopsaceae)	0	0	1	1	Cellulosimicrobium	0	0	2	2	Serratia	1	0	2	3	Chroococcidiopsis SAG 2023	0	0	2	2
326	NA1192_(Neisseriaceae)	0	0	1	1	Cetobacterium	0	0	2	2	Thermobifida	1	0	2	3	Constrictibacter	0	0	2	2
327	NA1193_(67-14)	0	0	1	1	Chroococcidiopsis SAG 2023	0	0	2	2	Verticiella	1	0	2	3	Crossiella	0	0	2	2
328	NA1218_(Sphingomonadaceae)	0	0	1	1	CL500-29 marine group	0	0	2	2	Vibrio	1	0	2	3	Curtobacterium	0	0	2	2
329	NA1242_(Caldilineaceae)	0	0	1	1	Coprococcus	0	0	2	2	Acidibacter	1	0	1	2	Defluviicoccus	0	0	2	2
330	NA1264_(Pedosphaeraceae)	0	0	1	1	Crossiella	0	0	2	2	Actinomyces	1	0	1	2	Duganella	0	0	2	2
331	NA13_(Bacillaceae)	0	0	1	1	Curtobacterium	0	0	2	2	Aerococcus	1	0	1	2	Egicoccus	0	0	2	2
332	NA1306_(Oscillospiraceae)	0	0	1	1	Defluviitaleaceae UCG-011	0	0	2	2	Aminobacter	1	0	1	2	Empedobacter	0	0	2	2
333	NA1342_(Rhodanobacteraceae)	0	0	1	1	Fictibacillus	0	0	2	2	Arenimonas	1	0	1	2	Enhydrobacter	0	0	2	2
334	NA1369_(Muribaculaceae)	0	0	1	1	Flaviflexus	0	0	2	2	Azohydromonas	1	0	1	2	Erysipelothrix	0	0	2	2
335	NA137_([Eubacterium] coprostanoligenes group)	0	0	1	1	Galbitalea	0	0	2	2	Catenisphaera	1	0	1	2	Erysipelotrichaceae UCG-003	0	0	2	2
336	NA139_(Planococcaceae)	0	0	1	1	Gemmobacter	0	0	2	2	Crossiella	1	0	1	2	Erythrobacter	0	0	2	2
337	NA14_(Lachnospiraceae)	0	0	1	1	Glycomyces	0	0	2	2	Curtobacterium	1	0	1	2	Faecalicoccus	0	0	2	2
338	NA141_(JG30-KF-CM45)	0	0	1	1	Haloactinopolyspora	0	0	2	2	Enorma	1	0	1	2	Ferruginibacter	0	0	2	2
339	NA1427_(Vicinamibacteraceae)	0	0	1	1	Helicobacter	0	0	2	2	Ensifer	1	0	1	2	Fictibacillus	0	0	2	2
340	NA147_(Sphingomonadaceae)	0	0	1	1	Kineosphaera	0	0	2	2	Faecalicoccus	1	0	1	2	Gemmobacter	0	0	2	2
341	NA148_(Comamonadaceae)	0	0	1	1	Kineosporia	0	0	2	2	Flaviflexus	1	0	1	2	Gracilibacillus	0	0	2	2
342	NA1490_(Geminicoccaceae)	0	0	1	1	Klebsiella	0	0	2	2	Haemophilus	1	0	1	2	Haliangium	0	0	2	2
343	NA1494_([Eubacterium] coprostanoligenes group)	0	0	1	1	Lachnospiraceae FCS020 group	0	0	2	2	Hahella	1	0	1	2	Intrasporangium	0	0	2	2
344	NA154_(Anaerococcus)	0	0	1	1	Leucobacter	0	0	2	2	Hyphomicrobium	1	0	1	2	Janibacter	0	0	2	2
345	NA1571_(Sphingobacteriaceae)	0	0	1	1	Leuconostoc	0	0	2	2	Ignavigranum	1	0	1	2	Jatrophihabitans	0	0	2	2
346	NA158_(Tissierella)	0	0	1	1	Luteitalea	0	0	2	2	Intrasporangium	1	0	1	2	Kangiella	0	0	2	2
347	NA16_(Ruminococcaceae)	0	0	1	1	Macrococcus	0	0	2	2	Irregularibacter	1	0	1	2	Klebsiella	0	0	2	2
348	NA160_(Flavobacteriaceae)	0	0	1	1	Marinilactibacillus	0	0	2	2	Kineosporia	1	0	1	2	Kribbella	0	0	2	2
349	NA161_(Coleofasciculaceae)	0	0	1	1	Megasphaera	0	0	2	2	Klebsiella	1	0	1	2	Lachnospiraceae FCS020 group	0	0	2	2
350	NA162_(Rhodobacteraceae)	0	0	1	1	Mesorhizobium	0	0	2	2	Membranicola	1	0	1	2	Lachnospiraceae NK4A136 group	0	0	2	2
351	NA176_(Bacillaceae)	0	0	1	1	Methylotenera	0	0	2	2	Merdibacter	1	0	1	2	Lachnospiraceae NK4B4 group	0	0	2	2
352	NA1768_(67-14)	0	0	1	1	Micrococcus	0	0	2	2	Methylophaga	1	0	1	2	Lachnospiraceae UCG-001	0	0	2	2
353	NA179_(Acetobacteraceae)	0	0	1	1	MND1	0	0	2	2	Motilibacter	1	0	1	2	Lachnospiraceae UCG-004	0	0	2	2
354	NA180_(Microbacteriaceae)	0	0	1	1	Nannocystis	0	0	2	2	Mucispirillum	1	0	1	2	Lachnospiraceae UCG-009	0	0	2	2
355	NA1852_(Ardenticatenaceae)	0	0	1	1	Nitrosomonas	0	0	2	2	Nocardia	1	0	1	2	Lacticigenium	0	0	2	2
356	NA19_(Micrococcaceae)	0	0	1	1	Oceanobacter	0	0	2	2	Nonomuraea	1	0	1	2	Lactococcus	0	0	2	2
357	NA1923_(NS11-12 marine group)	0	0	1	1	Opitutus	0	0	2	2	Odoribacter	1	0	1	2	Leptolyngbya EcFYyyy-00	0	0	2	2
358	NA193_(Lachnospiraceae)	0	0	1	1	Oribacterium	0	0	2	2	Ohtaekwangia	1	0	1	2	Leptolyngbya Es-Yyy1000	0	0	2	2
359	NA196_(Comamonadaceae)	0	0	1	1	Paenisporosarcina	0	0	2	2	Oligella	1	0	1	2	Longimicrobium	0	0	2	2
360	NA20_(Lachnospiraceae)	0	0	1	1	Parabacteroides	0	0	2	2	Opitutus	1	0	1	2	Luteolibacter	0	0	2	2
361	NA200_(Sphingomonadaceae)	0	0	1	1	Parasegetibacter	0	0	2	2	Paludicola	1	0	1	2	Marinilactibacillus	0	0	2	2
362	NA204_(Sphingomonadaceae)	0	0	1	1	Patulibacter	0	0	2	2	Planomonospora	1	0	1	2	Marinobacter	0	0	2	2
363	NA21_(Oxalobacteraceae)	0	0	1	1	Phytohabitans	0	0	2	2	Pseudarthrobacter	1	0	1	2	Membranicola	0	0	2	2
364	NA212_(Oligoflexus)	0	0	1	1	Pirellula	0	0	2	2	Savagea	1	0	1	2	Methylobacillus	0	0	2	2
365	NA2190_(WD2101 soil group)	0	0	1	1	Planomonospora	0	0	2	2	Sporichthya	1	0	1	2	Methylocella	0	0	2	2
366	NA2216_(Micropepsaceae)	0	0	1	1	Porphyrobacter	0	0	2	2	Terribacillus	1	0	1	2	Motilibacter	0	0	2	2
367	NA226_(Myxococcaceae)	0	0	1	1	Promicromonospora	0	0	2	2	Terrimonas	1	0	1	2	Mucilaginibacter	0	0	2	2
368	NA228_(JG30-KF-CM45)	0	0	1	1	Proteiniphilum	0	0	2	2	Trueperella	1	0	1	2	Mucispirillum	0	0	2	2
369	NA229_(Carnobacteriaceae)	0	0	1	1	Pseudarthrobacter	0	0	2	2	UCG-001	1	0	1	2	Myxococcus	0	0	2	2
370	NA243_(Enterobacteriaceae)	0	0	1	1	Raoultella	0	0	2	2	Vicinamibacter	1	0	1	2	Nitrosomonas	0	0	2	2
371	NA2438_(Sphingomonadaceae)	0	0	1	1	RB41	0	0	2	2	Xanthomonas	1	0	1	2	Nocardia	0	0	2	2
372	NA25_(Comamonadaceae)	0	0	1	1	Rheinheimera	0	0	2	2	[Eubacterium] ventriosum group	1	0	0	1	Oribacterium	0	0	2	2
373	NA2504_(Acetobacteraceae)	0	0	1	1	Rhodopirellula	0	0	2	2	[Polyangium] brachysporum group	1	0	0	1	Oscillospira	0	0	2	2
374	NA2605_(Chitinophagaceae)	0	0	1	1	Ruania	0	0	2	2	Abditibacterium	1	0	0	1	Paenisporosarcina	0	0	2	2
375	NA2636_(Tissierella)	0	0	1	1	Rubritepida	0	0	2	2	Acidaminococcus	1	0	0	1	Parasutterella	0	0	2	2
376	NA2649_(Fimbriimonadaceae)	0	0	1	1	Rummeliibacillus	0	0	2	2	Acidovorax	1	0	0	1	Paucisalibacillus	0	0	2	2
377	NA265_(Enterobacteriaceae)	0	0	1	1	Saccharomonospora	0	0	2	2	Actinokineospora	1	0	0	1	Peredibacter	0	0	2	2
378	NA268_(Rhodobacteraceae)	0	0	1	1	Salana	0	0	2	2	Aeromonas	1	0	0	1	Pir4 lineage	0	0	2	2
379	NA27_(Beijerinckiaceae)	0	0	1	1	Salinicola	0	0	2	2	Aerosphaera	1	0	0	1	Pirellula	0	0	2	2
380	NA2720_(Devosiaceae)	0	0	1	1	Sanguibacter	0	0	2	2	Algoriphagus	1	0	0	1	Planomonospora	0	0	2	2
381	NA2856_(env.OPS 17)	0	0	1	1	Sellimonas	0	0	2	2	Alteribacillus	1	0	0	1	Pseudactinotalea	0	0	2	2
382	NA29_(Bacillaceae)	0	0	1	1	Serratia	0	0	2	2	Alysiella	1	0	0	1	Puia	0	0	2	2
383	NA291_(67-14)	0	0	1	1	Sporocytophaga	0	0	2	2	Anaerofilum	1	0	0	1	Pygmaiobacter	0	0	2	2
384	NA2939_(Micrococcaceae)	0	0	1	1	Stenotrophobacter	0	0	2	2	Anaerofustis	1	0	0	1	Raoultella	0	0	2	2
385	NA296_(Oscillospiraceae)	0	0	1	1	Sutterella	0	0	2	2	Angelakisella	1	0	0	1	RB41	0	0	2	2
386	NA3_(Planococcaceae)	0	0	1	1	Symplocastrum CPER-KK1	0	0	2	2	Antarcticibacterium	1	0	0	1	Rhodopirellula	0	0	2	2
387	NA300_(Microbacteriaceae)	0	0	1	1	SZB85	0	0	2	2	Aquabacterium	1	0	0	1	Rubritepida	0	0	2	2
388	NA31_(Planococcaceae)	0	0	1	1	Terrimonas	0	0	2	2	Archangium	1	0	0	1	Salana	0	0	2	2
389	NA311_(Rhodobacteraceae)	0	0	1	1	Thauera	0	0	2	2	Armatimonas	1	0	0	1	Salinicola	0	0	2	2
390	NA3168_(A4b)	0	0	1	1	Thermoactinomyces	0	0	2	2	Arsenicicoccus	1	0	0	1	Sanguibacter	0	0	2	2
391	NA319_(Planococcaceae)	0	0	1	1	Thermomonas	0	0	2	2	Aureibacillus	1	0	0	1	Sellimonas	0	0	2	2
392	NA32_(Planococcaceae)	0	0	1	1	Trichocoleus SAG 26.92	0	0	2	2	Azoarcus	1	0	0	1	Sphingopyxis	0	0	2	2
393	NA324_(Comamonadaceae)	0	0	1	1	UCG-001	0	0	2	2	Azospirillum	1	0	0	1	Sporichthya	0	0	2	2
394	NA329_(Lachnospiraceae)	0	0	1	1	Verticiella	0	0	2	2	Azotobacter	1	0	0	1	Stackebrandtia	0	0	2	2
395	NA3448_(Fibrobacteraceae)	0	0	1	1	Vibrio	0	0	2	2	Bacteriovorax	1	0	0	1	Sumerlaea	0	0	2	2
396	NA3449_(Vermiphilaceae)	0	0	1	1	Vicinamibacter	0	0	2	2	Bavariicoccus	1	0	0	1	Terribacillus	0	0	2	2
397	NA346_(Chroococcidiopsaceae)	0	0	1	1	Vulgatibacter	0	0	2	2	Bilophila	1	0	0	1	Thermobifida	0	0	2	2
398	NA3494_(NS9 marine group)	0	0	1	1	Xylophilus	0	0	2	2	Bradymonas	1	0	0	1	Tuzzerella	0	0	2	2
399	NA35_(Oxalobacteraceae)	0	0	1	1	Prauserella	0	1	1	2	Bradyrhizobium	1	0	0	1	UCG-001	0	0	2	2
400	NA360_(Kineosporiaceae)	0	0	1	1	[Eubacterium] brachy group	0	0	1	1	Brumimicrobium	1	0	0	1	UCG-004	0	0	2	2
401	NA37_(Rhodobacteraceae)	0	0	1	1	[Eubacterium] xylanophilum group	0	0	1	1	Butyricimonas	1	0	0	1	UCG-008	0	0	2	2
402	NA3734_(Candidatus Hepatincola)	0	0	1	1	[Ruminococcus] gnavus group	0	0	1	1	Caedibacter	1	0	0	1	Veillonella	0	0	2	2
403	NA378_(Solirubrobacteraceae)	0	0	1	1	Acholeplasma	0	0	1	1	Caenimonas	1	0	0	1	Verticiella	0	0	2	2
404	NA385_(Bacillaceae)	0	0	1	1	Acidibacter	0	0	1	1	Candidatus Amoebophilus	1	0	0	1	WCHB1-32	0	0	2	2
405	NA39_(Chroococcidiopsaceae)	0	0	1	1	Acidiphilium	0	0	1	1	Candidatus Endoecteinascidia	1	0	0	1	Xylophilus	0	0	2	2
406	NA402_([Eubacterium] coprostanoligenes group)	0	0	1	1	Acidovorax	0	0	1	1	Candidatus Finniella	1	0	0	1	Ammoniphilus	0	2	1	3
407	NA4039_(SM2D12)	0	0	1	1	Actinocorallia	0	0	1	1	Candidatus Gigarickettsia	1	0	0	1	Nonomuraea	0	1	1	2
408	NA416_(Intrasporangiaceae)	0	0	1	1	Actinokineospora	0	0	1	1	Candidatus Megaira	1	0	0	1	Pseudarthrobacter	0	1	1	2
409	NA4404_(SM2D12)	0	0	1	1	Acuticoccus	0	0	1	1	Candidatus Obscuribacter	1	0	0	1	[Eubacterium] ruminantium group	0	0	1	1
410	NA458_(Planococcaceae)	0	0	1	1	Aequorivita	0	0	1	1	Candidatus Portiera	1	0	0	1	1174-901-12	0	0	1	1
411	NA4643_(LWQ8)	0	0	1	1	Aeriscardovia	0	0	1	1	Candidatus Protochlamydia	1	0	0	1	44679	0	0	1	1
412	NA4644_(Gracilibacter)	0	0	1	1	Aeromonas	0	0	1	1	Candidatus Stoquefichus	1	0	0	1	Acholeplasma	0	0	1	1
413	NA467_(Streptomycetaceae)	0	0	1	1	Aerosphaera	0	0	1	1	Caproiciproducens	1	0	0	1	Acidiphilium	0	0	1	1
414	NA470_(Xanthobacteraceae)	0	0	1	1	Aestuariicella	0	0	1	1	Catellicoccus	1	0	0	1	Actinoalloteichus	0	0	1	1
415	NA480_(Cellvibrionaceae)	0	0	1	1	Agrococcus	0	0	1	1	Cerasicoccus	1	0	0	1	Actinocorallia	0	0	1	1
416	NA487_(AKAU3644)	0	0	1	1	Aliifodinibius	0	0	1	1	Cereibacter	1	0	0	1	Actinokineospora	0	0	1	1
417	NA5_(Micrococcaceae)	0	0	1	1	Alishewanella	0	0	1	1	Chitinivorax	1	0	0	1	Actinomyces	0	0	1	1
418	NA506_(Carnobacteriaceae)	0	0	1	1	Alkaliflexus	0	0	1	1	Chlorogloeopsis PCC-7518	1	0	0	1	Actinopolyspora	0	0	1	1
419	NA514_(Chroococcidiopsaceae)	0	0	1	1	Alloactinosynnema	0	0	1	1	Chryseoglobus	1	0	0	1	Aeromonas	0	0	1	1
420	NA523_(Micrococcaceae)	0	0	1	1	Allobaculum	0	0	1	1	Citrobacter	1	0	0	1	Aerosphaera	0	0	1	1
421	NA529_(Solirubrobacteraceae)	0	0	1	1	Alloiococcus	0	0	1	1	Clavibacter	1	0	0	1	Afifella	0	0	1	1
422	NA539_(Enterobacteriaceae)	0	0	1	1	alphaI cluster	0	0	1	1	Cloacibacterium	1	0	0	1	Agrococcus	0	0	1	1
423	NA54_(Rhodobacteraceae)	0	0	1	1	Amphibacillus	0	0	1	1	Clostridioides	1	0	0	1	Aliifodinibius	0	0	1	1
424	NA57_(Lachnospiraceae)	0	0	1	1	Anaerobacillus	0	0	1	1	Clostridium sensu stricto 13	1	0	0	1	Alishewanella	0	0	1	1
425	NA570_(Planococcaceae)	0	0	1	1	Anaerobiospirillum	0	0	1	1	Clostridium sensu stricto 6	1	0	0	1	Alkalibacter	0	0	1	1
426	NA575_(Rickettsiaceae)	0	0	1	1	Anaerolinea	0	0	1	1	Corallococcus	1	0	0	1	Alkaliflexus	0	0	1	1
427	NA579_(Ruminococcaceae)	0	0	1	1	Anaeroplasma	0	0	1	1	Corticibacterium	1	0	0	1	Alkanindiges	0	0	1	1
428	NA58_(Comamonadaceae)	0	0	1	1	Anseongella	0	0	1	1	Crinalium SAG 22.89	1	0	0	1	alphaI cluster	0	0	1	1
429	NA592_(Comamonadaceae)	0	0	1	1	Antricoccus	0	0	1	1	Croceicoccus	1	0	0	1	Alysiella	0	0	1	1
430	NA6_(Staphylococcaceae)	0	0	1	1	Aquicella	0	0	1	1	Cronobacter	1	0	0	1	Anaerobacillus	0	0	1	1
431	NA62_(Rhizobiaceae)	0	0	1	1	Archangium	0	0	1	1	Cylindrospermum SAG 11.82	1	0	0	1	Anaerobiospirillum	0	0	1	1
432	NA64_(Planococcaceae)	0	0	1	1	Arcobacter	0	0	1	1	Delftia	1	0	0	1	Anaerofilum	0	0	1	1
433	NA654_(Sandaracinaceae)	0	0	1	1	Arenimonas	0	0	1	1	Dermatophilus	1	0	0	1	Anaerolinea	0	0	1	1
434	NA66_(Bacillaceae)	0	0	1	1	Arsenicicoccus	0	0	1	1	Desulfosporosinus	1	0	0	1	Aquabacterium	0	0	1	1
435	NA67_(Streptomycetaceae)	0	0	1	1	Arsenicitalea	0	0	1	1	Dialister	1	0	0	1	Archangium	0	0	1	1
436	NA684_(Sphingomonadaceae)	0	0	1	1	Asanoa	0	0	1	1	Dongia	1	0	0	1	Arsenicicoccus	0	0	1	1
437	NA696_(67-14)	0	0	1	1	Azoarcus	0	0	1	1	DTU089	1	0	0	1	Asanoa	0	0	1	1
438	NA704_(Ruminococcaceae)	0	0	1	1	Azotobacter	0	0	1	1	E1B-B3-114	1	0	0	1	Aurantisolimonas	0	0	1	1
439	NA710_(Rhizobiaceae)	0	0	1	1	Barnesiella	0	0	1	1	Elizabethkingia	1	0	0	1	Avibacterium	0	0	1	1
440	NA72_(Carnobacteriaceae)	0	0	1	1	Bauldia	0	0	1	1	Ellin517	1	0	0	1	Azotobacter	0	0	1	1
441	NA748_(67-14)	0	0	1	1	Bergeyella	0	0	1	1	EMP-G18	1	0	0	1	Bavariicoccus	0	0	1	1
442	NA802_(Ruminococcaceae)	0	0	1	1	Bosea	0	0	1	1	Empedobacter	1	0	0	1	Bergeyella	0	0	1	1
443	NA82_(Lachnospiraceae)	0	0	1	1	Brevibacillus	0	0	1	1	Erwinia	1	0	0	1	Blastopirellula	0	0	1	1
444	NA825_(Prevotellaceae)	0	0	1	1	Brumimicrobium	0	0	1	1	Escherichia-Shigella	1	0	0	1	Bordetella	0	0	1	1
445	NA826_(Promicromonosporaceae)	0	0	1	1	Buchnera	0	0	1	1	Faecalitalea	1	0	0	1	Brevibacillus	0	0	1	1
446	NA838_(Nocardioidaceae)	0	0	1	1	CAG-56	0	0	1	1	Family XIII UCG-001	1	0	0	1	Burkholderia-Caballeronia-Paraburkholderia	0	0	1	1
447	NA840_(Muribaculaceae)	0	0	1	1	Caldibacillus	0	0	1	1	Faucicola	1	0	0	1	Camelimonas	0	0	1	1
448	NA844_(Bacillaceae)	0	0	1	1	Candidatus Amoebophilus	0	0	1	1	Fibrisoma	1	0	0	1	Candidatus Amoebophilus	0	0	1	1
449	NA86_(Lachnospiraceae)	0	0	1	1	Candidatus Arthromitus	0	0	1	1	Flavitalea	1	0	0	1	Candidatus Finniella	0	0	1	1
450	NA87_(Enterobacteriaceae)	0	0	1	1	Candidatus Finniella	0	0	1	1	Fluviicoccus	1	0	0	1	Candidatus Megaira	0	0	1	1
451	NA88_(Enterobacteriaceae)	0	0	1	1	Candidatus Saccharimonas	0	0	1	1	Franconibacter	1	0	0	1	Candidatus Ovatusbacter	0	0	1	1
452	NA882_(Sphingomonadaceae)	0	0	1	1	Candidatus Udaeobacter	0	0	1	1	Frondihabitans	1	0	0	1	Candidatus Paracaedibacter	0	0	1	1
453	NA907_(Desulfovibrionaceae)	0	0	1	1	Catellatospora	0	0	1	1	Fulvimarina	1	0	0	1	Candidatus Portiera	0	0	1	1
454	NA92_(Bacillaceae)	0	0	1	1	Catellicoccus	0	0	1	1	Fusicatenibacter	1	0	0	1	Candidatus Saccharimonas	0	0	1	1
455	NA936_(Cellvibrionaceae)	0	0	1	1	CHKCI001	0	0	1	1	Galbibacter	1	0	0	1	Candidatus Stoquefichus	0	0	1	1
456	NA97_(Nocardioidaceae)	0	0	1	1	Chloronema	0	0	1	1	Gallibacterium	1	0	0	1	Candidatus Udaeobacter	0	0	1	1
457	NA986_(Bacillaceae)	0	0	1	1	Chryseomicrobium	0	0	1	1	Gilliamella	1	0	0	1	Candidatus Vestibaculum	0	0	1	1
458	NA99_(Planococcaceae)	0	0	1	1	Chthonobacter	0	0	1	1	Globicatella	1	0	0	1	Candidimonas	0	0	1	1
459	NA994_(Rickettsiaceae)	0	0	1	1	Citrobacter	0	0	1	1	Gordonibacter	1	0	0	1	Carnobacterium	0	0	1	1
460	Neo-b11	0	0	1	1	Clavibacter	0	0	1	1	Guyparkeria	1	0	0	1	Catellatospora	0	0	1	1
461	Nevskia	0	0	1	1	Cloacibacterium	0	0	1	1	Halocella	1	0	0	1	Catenisphaera	0	0	1	1
462	Niabella	0	0	1	1	Clostridioides	0	0	1	1	Helicobacter	1	0	0	1	CENA518	0	0	1	1
463	Nibribacter	0	0	1	1	Cohnella	0	0	1	1	Herbaspirillum	1	0	0	1	Cerasibacillus	0	0	1	1
464	Nitrosospira	0	0	1	1	Coraliomargarita	0	0	1	1	Herbiconiux	1	0	0	1	Cerasicoccus	0	0	1	1
465	Nitrospira	0	0	1	1	Couchioplanes	0	0	1	1	Hydrogenophaga	1	0	0	1	Cereibacter	0	0	1	1
466	NS2b marine group	0	0	1	1	Cryptosporangium	0	0	1	1	Hylemonella	1	0	0	1	Cesiribacter	0	0	1	1
467	NS5 marine group	0	0	1	1	Cupriavidus	0	0	1	1	Idiomarina	1	0	0	1	Cetobacterium	0	0	1	1
468	Oceanimonas	0	0	1	1	Curvibacter	0	0	1	1	IMCC26207	1	0	0	1	Chloronema	0	0	1	1
469	Oceanisphaera	0	0	1	1	Cutibacterium	0	0	1	1	Intestinibacter	1	0	0	1	Chryseomicrobium	0	0	1	1
470	Oerskovia	0	0	1	1	Dactylosporangium	0	0	1	1	Janthinobacterium	1	0	0	1	Citrobacter	0	0	1	1
471	OLB8	0	0	1	1	Defluviicoccus	0	0	1	1	Jatrophihabitans	1	0	0	1	Clavibacter	0	0	1	1
472	OM27 clade	0	0	1	1	Delftia	0	0	1	1	JCM 18997	1	0	0	1	Cloacibacterium	0	0	1	1
473	Oscillibacter	0	0	1	1	Demequina	0	0	1	1	Kineosphaera	1	0	0	1	Cohnella	0	0	1	1
474	Ottowia	0	0	1	1	Dermatophilus	0	0	1	1	Kingella	1	0	0	1	Collinsella	0	0	1	1
475	Paenarthrobacter	0	0	1	1	Desulfosporosinus	0	0	1	1	Kosakonia	1	0	0	1	Coraliomargarita	0	0	1	1
476	Paeniclostridium	0	0	1	1	Desulfovibrio	0	0	1	1	Kushneria	1	0	0	1	Corticibacterium	0	0	1	1
477	Pajaroellobacter	0	0	1	1	Desulfovirga	0	0	1	1	Labrys	1	0	0	1	Couchioplanes	0	0	1	1
478	Paludibacter	0	0	1	1	dgA-11 gut group	0	0	1	1	Lachnospiraceae FCS020 group	1	0	0	1	CPla-4 termite group	0	0	1	1
479	Panacagrimonas	0	0	1	1	Duganella	0	0	1	1	Lachnospiraceae FE2018 group	1	0	0	1	Cupriavidus	0	0	1	1
480	Parabacteroides	0	0	1	1	Egicoccus	0	0	1	1	Lacunisphaera	1	0	0	1	Cytophaga	0	0	1	1
481	Parapusillimonas	0	0	1	1	Eisenbergiella	0	0	1	1	Lautropia	1	0	0	1	Dactylosporangium	0	0	1	1
482	Parasutterella	0	0	1	1	Ellin517	0	0	1	1	Leptolyngbya EcFYyyy-00	1	0	0	1	Dechloromonas	0	0	1	1
483	Patulibacter	0	0	1	1	Ellin6067	0	0	1	1	Longispora	1	0	0	1	Demequina	0	0	1	1
484	Peptostreptococcus	0	0	1	1	Enhydrobacter	0	0	1	1	Loriellopsis LF-B5	1	0	0	1	Desulfomicrobium	0	0	1	1
485	Phascolarctobacterium	0	0	1	1	Ensifer	0	0	1	1	Lysinimonas	1	0	0	1	Dialister	0	0	1	1
486	Pigmentiphaga	0	0	1	1	Erwinia	0	0	1	1	Marinobacterium	1	0	0	1	Diplosphaera	0	0	1	1
487	Pirellula	0	0	1	1	Erysipelothrix	0	0	1	1	Marinospirillum	1	0	0	1	DMER64	0	0	1	1
488	Piscibacillus	0	0	1	1	Erysipelotrichaceae UCG-002	0	0	1	1	Marisediminicola	1	0	0	1	Dongia	0	0	1	1
489	Pisciglobus	0	0	1	1	Erysipelotrichaceae UCG-003	0	0	1	1	Methylobacter	1	0	0	1	DTU089	0	0	1	1
490	Promicromonospora	0	0	1	1	Escherichia-Shigella	0	0	1	1	Methylophilus	1	0	0	1	E1B-B3-114	0	0	1	1
491	Propioniciclava	0	0	1	1	Faecalicoccus	0	0	1	1	Methylopila	1	0	0	1	Endomicrobium	0	0	1	1
492	Proteiniphilum	0	0	1	1	FFCH7168	0	0	1	1	Microbacterium	1	0	0	1	Ensifer	0	0	1	1
493	Pseudanabaena NgrPSln22	0	0	1	1	Franconibacter	0	0	1	1	Microcoleus PCC-7113	1	0	0	1	Erwinia	0	0	1	1
494	Pseudorhizobium	0	0	1	1	Frisingicoccus	0	0	1	1	Microcoleus SAG 1449-1a	1	0	0	1	Faecalibaculum	0	0	1	1
495	Pseudosphingobacterium	0	0	1	1	Frondihabitans	0	0	1	1	MN 122.2a	1	0	0	1	Faecalitalea	0	0	1	1
496	Psychroglaciecola	0	0	1	1	Fusicatenibacter	0	0	1	1	Mobilicoccus	1	0	0	1	Fermentimonas	0	0	1	1
497	Puia	0	0	1	1	Galbibacter	0	0	1	1	NA102_(Acetobacteraceae)	1	0	0	1	Flavitalea	0	0	1	1
498	Ramlibacter	0	0	1	1	Gallibacterium	0	0	1	1	NA1038_(JG30-KF-CM45)	1	0	0	1	Fluviicola	0	0	1	1
499	Rathayibacter	0	0	1	1	GCA-900066575	0	0	1	1	NA104_(Ruminococcaceae)	1	0	0	1	Formosa	0	0	1	1
500	RB41	0	0	1	1	Gemmata	0	0	1	1	NA105_(Pseudonocardiaceae)	1	0	0	1	Franconibacter	0	0	1	1
501	Rhodopirellula	0	0	1	1	Hahella	0	0	1	1	NA1056_(Micromonosporaceae)	1	0	0	1	Fulvimarina	0	0	1	1
502	Rothia	0	0	1	1	Halobacillus	0	0	1	1	NA1058_(Coriobacteriales Incertae Sedis)	1	0	0	1	Fusicatenibacter	0	0	1	1
503	Saccharothrix	0	0	1	1	Halolactibacillus	0	0	1	1	NA106_(Oligoflexus)	1	0	0	1	Galbibacter	0	0	1	1
504	Salinicola	0	0	1	1	Herbaspirillum	0	0	1	1	NA1063_(Lachnospiraceae)	1	0	0	1	Gallibacterium	0	0	1	1
505	Sanguibacter	0	0	1	1	Herbiconiux	0	0	1	1	NA107_(Lachnospiraceae)	1	0	0	1	Gemmata	0	0	1	1
506	Schwartzia	0	0	1	1	Hirschia	0	0	1	1	NA108_(Lachnospiraceae)	1	0	0	1	Gillisia	0	0	1	1
507	Scytonema UTEX 2349	0	0	1	1	Huanghella	0	0	1	1	NA1087_(Oscillospiraceae)	1	0	0	1	Globicatella	0	0	1	1
508	Sellimonas	0	0	1	1	Hylemonella	0	0	1	1	NA1088_(Xanthobacteraceae)	1	0	0	1	Gordonia	0	0	1	1
509	Serinicoccus	0	0	1	1	Ignavigranum	0	0	1	1	NA1091_(TRA3-20)	1	0	0	1	Gordonibacter	0	0	1	1
510	Serratia	0	0	1	1	Ilumatobacter	0	0	1	1	NA11_(Marinococcaceae)	1	0	0	1	Gramella	0	0	1	1
511	Shuttleworthia	0	0	1	1	IMCC26207	0	0	1	1	NA110_(Ruminococcaceae)	1	0	0	1	Hahella	0	0	1	1
512	Sinobaca	0	0	1	1	Inquilinus	0	0	1	1	NA1100_(Diplorickettsiaceae)	1	0	0	1	Halanaerobium	0	0	1	1
513	Siphonobacter	0	0	1	1	Intestinibacter	0	0	1	1	NA1102_(F082)	1	0	0	1	Haloactinopolyspora	0	0	1	1
514	Sorangium	0	0	1	1	Intestinimonas	0	0	1	1	NA111_(JG30-KF-CM45)	1	0	0	1	Halobacillus	0	0	1	1
515	Sporacetigenium	0	0	1	1	Intrasporangium	0	0	1	1	NA1114_(Aerococcaceae)	1	0	0	1	Halolactibacillus	0	0	1	1
516	Subdoligranulum	0	0	1	1	Jahnella	0	0	1	1	NA112_(Chroococcidiopsaceae)	1	0	0	1	Herbaspirillum	0	0	1	1
517	Symplocastrum CPER-KK1	0	0	1	1	Janibacter	0	0	1	1	NA1122_(Solirubrobacteraceae)	1	0	0	1	Hydrogenophaga	0	0	1	1
518	Tahibacter	0	0	1	1	Jannaschia	0	0	1	1	NA1127_(Bacillaceae)	1	0	0	1	Hylemonella	0	0	1	1
519	Tatumella	0	0	1	1	Janthinobacterium	0	0	1	1	NA113_(Ruminococcaceae)	1	0	0	1	Ignatzschineria	0	0	1	1
520	Thalassobacillus	0	0	1	1	JCM 18997	0	0	1	1	NA1131_(Rhodobacteraceae)	1	0	0	1	Ignavigranum	0	0	1	1
521	Thauera	0	0	1	1	Jeotgalibacillus	0	0	1	1	NA1136_(Nocardioidaceae)	1	0	0	1	IMCC26134	0	0	1	1
522	Thermoactinomyces	0	0	1	1	JGI 0001001-H03	0	0	1	1	NA1151_(Lachnospiraceae)	1	0	0	1	Indibacter	0	0	1	1
523	Trichococcus	0	0	1	1	Kribbella	0	0	1	1	NA1159_(Oscillospiraceae)	1	0	0	1	Intestinibacter	0	0	1	1
524	UCG-007	0	0	1	1	Kushneria	0	0	1	1	NA116_(Gallicola)	1	0	0	1	Irregularibacter	0	0	1	1
525	UCG-009	0	0	1	1	Kytococcus	0	0	1	1	NA1160_(Bacillaceae)	1	0	0	1	Jahnella	0	0	1	1
526	Ulvibacter	0	0	1	1	Labrys	0	0	1	1	NA1161_(Planococcaceae)	1	0	0	1	Janthinobacterium	0	0	1	1
527	Verrucomicrobium	0	0	1	1	Lachnospiraceae NK4B4 group	0	0	1	1	NA1169_(AKIW781)	1	0	0	1	JCM 18997	0	0	1	1
528	Verticiella	0	0	1	1	Lachnospiraceae UCG-004	0	0	1	1	NA117_(Myxococcaceae)	1	0	0	1	Jeotgalibacillus	0	0	1	1
529	Xanthomonas	0	0	1	1	Lachnospiraceae UCG-009	0	0	1	1	NA1170_(Myxococcaceae)	1	0	0	1	JGI 0001001-H03	0	0	1	1
530	Amphibacillus	0	1	0	1	Lacticigenium	0	0	1	1	NA1188_(Bifidobacteriaceae)	1	0	0	1	Jonesia	0	0	1	1
531	Barnesiella	0	2	0	2	Lactococcus	0	0	1	1	NA1189_(ML635J-40 aquatic group)	1	0	0	1	Kibdelosporangium	0	0	1	1
532	Clade Ia	0	1	0	1	Leifsonia	0	0	1	1	NA1190_(Acetobacteraceae)	1	0	0	1	Kineosphaera	0	0	1	1
533	Coraliomargarita	0	1	0	1	Leptolyngbya PCC-6306	0	0	1	1	NA1201_(Microtrichaceae)	1	0	0	1	Kineosporia	0	0	1	1
534	Cupriavidus	0	1	0	1	Limibaculum	0	0	1	1	NA1222_(Lachnospiraceae)	1	0	0	1	Kushneria	0	0	1	1
535	Desulfovibrio	0	1	0	1	Limnohabitans	0	0	1	1	NA1223_(UCG-010)	1	0	0	1	Laceyella	0	0	1	1
536	Dorea	0	1	0	1	Luteolibacter	0	0	1	1	NA1224_(Ardenticatenaceae)	1	0	0	1	Lachnospiraceae XPB1014 group	0	0	1	1
537	Erysipelatoclostridium	0	1	0	1	Lysinimonas	0	0	1	1	NA1227_(Lachnospiraceae)	1	0	0	1	Leadbetterella	0	0	1	1
538	Globicatella	0	1	0	1	Macellibacteroides	0	0	1	1	NA1236_(WD2101 soil group)	1	0	0	1	Leifsonia	0	0	1	1
539	NA113_(Ruminococcaceae)	0	1	0	1	Mailhella	0	0	1	1	NA1238_(Lachnospiraceae)	1	0	0	1	Lentibacillus	0	0	1	1
540	NA1509_(Paludibacteraceae)	0	1	0	1	Marinobacterium	0	0	1	1	NA124_(Ruminococcaceae)	1	0	0	1	Leuconostoc	0	0	1	1
541	NA151_(JG30-KF-CM45)	0	1	0	1	Marisediminicola	0	0	1	1	NA1245_(Rhizobiaceae)	1	0	0	1	Limnohabitans	0	0	1	1
542	NA1655_(Gallionellaceae)	0	1	0	1	Meiothermus	0	0	1	1	NA1260_(Lachnospiraceae)	1	0	0	1	Lonsdalea	0	0	1	1
543	NA1700_(Planococcaceae)	0	1	0	1	Mesonia	0	0	1	1	NA1266_(Acetobacteraceae)	1	0	0	1	Loriellopsis LF-B5	0	0	1	1
544	NA173_(Bacillaceae)	0	1	0	1	Microcella	0	0	1	1	NA1274_(Rhodobacteraceae)	1	0	0	1	Lysinimonas	0	0	1	1
545	NA182_(JG30-KF-CM45)	0	1	0	1	Microcoleus SAG 1449-1a	0	0	1	1	NA128_(Bacillaceae)	1	0	0	1	Macellibacteroides	0	0	1	1
546	NA186_(Bacillaceae)	0	1	0	1	Micromonospora	0	0	1	1	NA1284_(UCG-010)	1	0	0	1	Mailhella	0	0	1	1
547	NA1861_(WD2101 soil group)	0	1	0	1	Mobilicoccus	0	0	1	1	NA129_(Lachnospiraceae)	1	0	0	1	Mannheimia	0	0	1	1
548	NA1912_(SC-I-84)	0	1	0	1	Mobilitalea	0	0	1	1	NA131_(Isosphaeraceae)	1	0	0	1	Marinobacterium	0	0	1	1
549	NA192_(Planococcaceae)	0	1	0	1	Moheibacter	0	0	1	1	NA133_(W5053)	1	0	0	1	Marinococcus	0	0	1	1
550	NA240_(Xanthomonadaceae)	0	1	0	1	Moraxella	0	0	1	1	NA1332_(Isosphaeraceae)	1	0	0	1	Marinospirillum	0	0	1	1
551	NA278_(Rhizobiaceae)	0	1	0	1	Motilibacter	0	0	1	1	NA1334_(Prevotellaceae)	1	0	0	1	Marisediminicola	0	0	1	1
552	NA437_(Sphingomonadaceae)	0	1	0	1	Mucilaginibacter	0	0	1	1	NA1335_(Peptococcaceae)	1	0	0	1	Megasphaera	0	0	1	1
553	NS4 marine group	0	1	0	1	Muricoccus	0	0	1	1	NA135_(Polyangiaceae)	1	0	0	1	Merdibacter	0	0	1	1
554	Oceanicella	0	1	0	1	NA1005_(AB1)	0	0	1	1	NA1353_(Ilumatobacteraceae)	1	0	0	1	Mesorhizobium	0	0	1	1
555	Paludicola	0	1	0	1	NA1006_(Sphingobacteriaceae)	0	0	1	1	NA1360_(Silvanigrellaceae)	1	0	0	1	Methylophaga	0	0	1	1
556	Prevotella	0	2	0	2	NA1009_(UCG-010)	0	0	1	1	NA1364_(Lachnospiraceae)	1	0	0	1	Microbacterium	0	0	1	1
557	Pseudogracilibacillus	0	1	0	1	NA101_(Microbacteriaceae)	0	0	1	1	NA1369_(Muribaculaceae)	1	0	0	1	Microcoleus PCC-7113	0	0	1	1
558	R76-B128	0	1	0	1	NA1016_(Ilumatobacteraceae)	0	0	1	1	NA137_([Eubacterium] coprostanoligenes group)	1	0	0	1	Micromonospora	0	0	1	1
559	Ruania	0	1	0	1	NA1019_(WD2101 soil group)	0	0	1	1	NA1384_(Ilumatobacteraceae)	1	0	0	1	MND1	0	0	1	1
560	Shewanella	0	1	0	1	NA1021_(AKIW781)	0	0	1	1	NA1386_(Flavobacteriaceae)	1	0	0	1	Mobilitalea	0	0	1	1
561	Terrimonas	0	1	0	1	NA1027_(UCG-010)	0	0	1	1	NA1397_(Chloroflexaceae)	1	0	0	1	Moheibacter	0	0	1	1
562	Truepera	0	1	0	1	NA103_(Micrococcaceae)	0	0	1	1	NA14_(Lachnospiraceae)	1	0	0	1	Myceligenerans	0	0	1	1
563	Variovorax	0	1	0	1	NA1033_(Nitriliruptoraceae)	0	0	1	1	NA142_(Streptomycetaceae)	1	0	0	1	NA1006_(Sphingobacteriaceae)	0	0	1	1
564						NA1038_(JG30-KF-CM45)	0	0	1	1	NA1427_(Vicinamibacteraceae)	1	0	0	1	NA1009_(UCG-010)	0	0	1	1
565						NA104_(Ruminococcaceae)	0	0	1	1	NA1438_(Bacillaceae)	1	0	0	1	NA101_(Microbacteriaceae)	0	0	1	1
566						NA1044_(Myxococcaceae)	0	0	1	1	NA144_(Acetobacteraceae)	1	0	0	1	NA1010_(Fastidiosipila)	0	0	1	1
567						NA1047_(Muribaculaceae)	0	0	1	1	NA1449_(Chroococcidiopsaceae)	1	0	0	1	NA1015_(Ruminococcaceae)	0	0	1	1
568						NA105_(Pseudonocardiaceae)	0	0	1	1	NA1453_(Acetobacteraceae)	1	0	0	1	NA1021_(AKIW781)	0	0	1	1
569						NA1057_(Bacillaceae)	0	0	1	1	NA1461_(Isosphaeraceae)	1	0	0	1	NA1027_(UCG-010)	0	0	1	1
570						NA1059_(Isosphaeraceae)	0	0	1	1	NA1469_(Muribaculaceae)	1	0	0	1	NA103_(Micrococcaceae)	0	0	1	1
571						NA1064_(Caldilineaceae)	0	0	1	1	NA147_(Sphingomonadaceae)	1	0	0	1	NA1035_(Streptomycetaceae)	0	0	1	1
572						NA1068_(Longimicrobiaceae)	0	0	1	1	NA1477_(Lachnospiraceae)	1	0	0	1	NA1038_(JG30-KF-CM45)	0	0	1	1
573						NA1069_(Comamonadaceae)	0	0	1	1	NA1479_(Lachnospiraceae)	1	0	0	1	NA1041_(Isosphaeraceae)	0	0	1	1
574						NA107_(Lachnospiraceae)	0	0	1	1	NA1483_(AKIW781)	1	0	0	1	NA1047_(Muribaculaceae)	0	0	1	1
575						NA1073_(Nocardioidaceae)	0	0	1	1	NA149_(Bacteroidales RF16 group)	1	0	0	1	NA105_(Pseudonocardiaceae)	0	0	1	1
576						NA1074_(Isosphaeraceae)	0	0	1	1	NA1491_(D05-2)	1	0	0	1	NA1054_(Moraxellaceae)	0	0	1	1
577						NA1078_(Longimicrobiaceae)	0	0	1	1	NA15_(Marinococcaceae)	1	0	0	1	NA1056_(Micromonosporaceae)	0	0	1	1
578						NA1084_([Eubacterium] coprostanoligenes group)	0	0	1	1	NA1507_(Sphingomonadaceae)	1	0	0	1	NA1057_(Bacillaceae)	0	0	1	1
579						NA1085_(Rhodobacteraceae)	0	0	1	1	NA1512_(Longimicrobiaceae)	1	0	0	1	NA1058_(Coriobacteriales Incertae Sedis)	0	0	1	1
580						NA1088_(Xanthobacteraceae)	0	0	1	1	NA1523_(Hymenobacteraceae)	1	0	0	1	NA1068_(Longimicrobiaceae)	0	0	1	1
581						NA109_(Bacillaceae)	0	0	1	1	NA1525_(Peptococcaceae)	1	0	0	1	NA1078_(Longimicrobiaceae)	0	0	1	1
582						NA1092_(67-14)	0	0	1	1	NA1539_(Peptococcaceae)	1	0	0	1	NA108_(Lachnospiraceae)	0	0	1	1
583						NA1094_(Lachnospiraceae)	0	0	1	1	NA154_(Anaerococcus)	1	0	0	1	NA1084_([Eubacterium] coprostanoligenes group)	0	0	1	1
584						NA11_(Marinococcaceae)	0	0	1	1	NA1545_(Lachnospiraceae)	1	0	0	1	NA1089_(Carnobacteriaceae)	0	0	1	1
585						NA1105_(JG30-KF-CM45)	0	0	1	1	NA156_(Rickettsiaceae)	1	0	0	1	NA109_(Bacillaceae)	0	0	1	1
586						NA111_(JG30-KF-CM45)	0	0	1	1	NA1576_(F082)	1	0	0	1	NA1090_(Bacteroidales RF16 group)	0	0	1	1
587						NA1113_(Beijerinckiaceae)	0	0	1	1	NA16_(Ruminococcaceae)	1	0	0	1	NA1091_(TRA3-20)	0	0	1	1
588						NA112_(Chroococcidiopsaceae)	0	0	1	1	NA162_(Rhodobacteraceae)	1	0	0	1	NA11_(Marinococcaceae)	0	0	1	1
589						NA1123_(Sphingomonadaceae)	0	0	1	1	NA1628_(Comamonadaceae)	1	0	0	1	NA110_(Ruminococcaceae)	0	0	1	1
590						NA113_(Ruminococcaceae)	0	0	1	1	NA163_(Comamonadaceae)	1	0	0	1	NA1102_(F082)	0	0	1	1
591						NA1130_(Coleofasciculaceae)	0	0	1	1	NA164_(Rhodobacteraceae)	1	0	0	1	NA1106_(Pseudonocardiaceae)	0	0	1	1
592						NA1131_(Rhodobacteraceae)	0	0	1	1	NA165_(Rickettsiaceae)	1	0	0	1	NA1107_(Anaerolineaceae)	0	0	1	1
593						NA1134_(Gemmatimonadaceae)	0	0	1	1	NA166_(Xanthobacteraceae)	1	0	0	1	NA1109_(Bacillaceae)	0	0	1	1
594						NA1135_(Bacillaceae)	0	0	1	1	NA1663_(Lachnospiraceae)	1	0	0	1	NA111_(JG30-KF-CM45)	0	0	1	1
595						NA1136_(Nocardioidaceae)	0	0	1	1	NA1677_(Xanthobacteraceae)	1	0	0	1	NA1114_(Aerococcaceae)	0	0	1	1
596						NA1138_(Sandaracinaceae)	0	0	1	1	NA169_(Lachnospiraceae)	1	0	0	1	NA1118_([Eubacterium] coprostanoligenes group)	0	0	1	1
597						NA1142_(JG30-KF-CM45)	0	0	1	1	NA1694_(F082)	1	0	0	1	NA1122_(Solirubrobacteraceae)	0	0	1	1
598						NA1144_(Vicinamibacteraceae)	0	0	1	1	NA1705_(Ruminococcaceae)	1	0	0	1	NA1134_(Gemmatimonadaceae)	0	0	1	1
599						NA115_(Coleofasciculaceae)	0	0	1	1	NA1709_(Lachnospiraceae)	1	0	0	1	NA1135_(Bacillaceae)	0	0	1	1
600						NA1152_(JG30-KF-CM45)	0	0	1	1	NA1724_(Lachnospiraceae)	1	0	0	1	NA1144_(Vicinamibacteraceae)	0	0	1	1
601						NA116_(Gallicola)	0	0	1	1	NA1750_(Ardenticatenaceae)	1	0	0	1	NA1152_(JG30-KF-CM45)	0	0	1	1
602						NA1162_(UCG-010)	0	0	1	1	NA1753_(Lachnospiraceae)	1	0	0	1	NA1154_(Isosphaeraceae)	0	0	1	1
603						NA1164_(Bacillaceae)	0	0	1	1	NA176_(Bacillaceae)	1	0	0	1	NA1158_(Rhodothermaceae)	0	0	1	1
604						NA1169_(AKIW781)	0	0	1	1	NA1773_(AKIW781)	1	0	0	1	NA116_(Gallicola)	0	0	1	1
605						NA1170_(Myxococcaceae)	0	0	1	1	NA1775_(Intrasporangiaceae)	1	0	0	1	NA1160_(Bacillaceae)	0	0	1	1
606						NA1174_(Fastidiosipila)	0	0	1	1	NA182_(JG30-KF-CM45)	1	0	0	1	NA1161_(Planococcaceae)	0	0	1	1
607						NA1175_(Lachnospiraceae)	0	0	1	1	NA184_(Rhizobiaceae)	1	0	0	1	NA1162_(UCG-010)	0	0	1	1
608						NA1179_(Acetobacteraceae)	0	0	1	1	NA1865_(Oxalobacteraceae)	1	0	0	1	NA1164_(Bacillaceae)	0	0	1	1
609						NA1181_(WD2101 soil group)	0	0	1	1	NA1874_(UCG-010)	1	0	0	1	NA1165_(Cyclobacteriaceae)	0	0	1	1
610						NA1182_(Isosphaeraceae)	0	0	1	1	NA188_(Oscillospiraceae)	1	0	0	1	NA1169_(AKIW781)	0	0	1	1
611						NA1183_(Geodermatophilaceae)	0	0	1	1	NA189_(Lachnospiraceae)	1	0	0	1	NA117_(Myxococcaceae)	0	0	1	1
612						NA1184_(Sphingomonadaceae)	0	0	1	1	NA1896_(Oscillospiraceae)	1	0	0	1	NA1174_(Fastidiosipila)	0	0	1	1
613						NA1190_(Acetobacteraceae)	0	0	1	1	NA1901_(67-14)	1	0	0	1	NA1175_(Lachnospiraceae)	0	0	1	1
614						NA1193_(67-14)	0	0	1	1	NA193_(Lachnospiraceae)	1	0	0	1	NA1183_(Geodermatophilaceae)	0	0	1	1
615						NA1195_(Oscillospiraceae)	0	0	1	1	NA196_(Comamonadaceae)	1	0	0	1	NA1184_(Sphingomonadaceae)	0	0	1	1
616						NA1202_(67-14)	0	0	1	1	NA1979_(UCG-010)	1	0	0	1	NA1188_(Bifidobacteriaceae)	0	0	1	1
617						NA1204_(AKIW781)	0	0	1	1	NA198_(Bacillaceae)	1	0	0	1	NA1193_(67-14)	0	0	1	1
618						NA1207_(Muribaculaceae)	0	0	1	1	NA20_(Lachnospiraceae)	1	0	0	1	NA1197_(Longimicrobiaceae)	0	0	1	1
619						NA1209_(Lachnospiraceae)	0	0	1	1	NA2000_(Micrococcaceae)	1	0	0	1	NA1199_(Muribaculaceae)	0	0	1	1
620						NA121_(Micrococcaceae)	0	0	1	1	NA2005_([Eubacterium] coprostanoligenes group)	1	0	0	1	NA1202_(67-14)	0	0	1	1
621						NA1219_(Sphingomonadaceae)	0	0	1	1	NA201_(Sphingomonadaceae)	1	0	0	1	NA1205_(JG30-KF-CM45)	0	0	1	1
622						NA1221_(AKIW781)	0	0	1	1	NA202_(Oxalobacteraceae)	1	0	0	1	NA1207_(Muribaculaceae)	0	0	1	1
623						NA1222_(Lachnospiraceae)	0	0	1	1	NA203_(Pasteurellaceae)	1	0	0	1	NA121_(Micrococcaceae)	0	0	1	1
624						NA1224_(Ardenticatenaceae)	0	0	1	1	NA2038_(67-14)	1	0	0	1	NA1214_(Oscillospiraceae)	0	0	1	1
625						NA1226_(UCG-010)	0	0	1	1	NA2058_(Cellvibrionaceae)	1	0	0	1	NA1219_(Sphingomonadaceae)	0	0	1	1
626						NA1233_(Bacillaceae)	0	0	1	1	NA21_(Oxalobacteraceae)	1	0	0	1	NA1223_(UCG-010)	0	0	1	1
627						NA1237_(AKIW781)	0	0	1	1	NA210_(Ruminococcaceae)	1	0	0	1	NA1226_(UCG-010)	0	0	1	1
628						NA1244_(B1-7BS)	0	0	1	1	NA2105_(67-14)	1	0	0	1	NA1227_(Lachnospiraceae)	0	0	1	1
629						NA1249_(Planococcaceae)	0	0	1	1	NA212_(Oligoflexus)	1	0	0	1	NA1233_(Bacillaceae)	0	0	1	1
630						NA125_(Intrasporangiaceae)	0	0	1	1	NA2135_(UCG-010)	1	0	0	1	NA1235_(Micromonosporaceae)	0	0	1	1
631						NA1253_(Nocardiaceae)	0	0	1	1	NA214_(Lachnospiraceae)	1	0	0	1	NA1237_(AKIW781)	0	0	1	1
632						NA1268_(AKIW781)	0	0	1	1	NA220_(Oscillospiraceae)	1	0	0	1	NA124_(Ruminococcaceae)	0	0	1	1
633						NA127_(Micrococcaceae)	0	0	1	1	NA2202_(67-14)	1	0	0	1	NA1243_(Coleofasciculaceae)	0	0	1	1
634						NA128_(Bacillaceae)	0	0	1	1	NA2204_(Saccharofermentans)	1	0	0	1	NA1244_(B1-7BS)	0	0	1	1
635						NA1284_(UCG-010)	0	0	1	1	NA2234_(Isosphaeraceae)	1	0	0	1	NA1249_(Planococcaceae)	0	0	1	1
636						NA1285_([Eubacterium] coprostanoligenes group)	0	0	1	1	NA2239_(Azospirillaceae)	1	0	0	1	NA125_(Intrasporangiaceae)	0	0	1	1
637						NA1296_(AKIW781)	0	0	1	1	NA224_(Lachnospiraceae)	1	0	0	1	NA1266_(Acetobacteraceae)	0	0	1	1
638						NA13_(Bacillaceae)	0	0	1	1	NA225_(Lachnospiraceae)	1	0	0	1	NA127_(Micrococcaceae)	0	0	1	1
639						NA1304_(Bacteroidales UCG-001)	0	0	1	1	NA2253_(Coriobacteriales Incertae Sedis)	1	0	0	1	NA1272_(Bacillaceae)	0	0	1	1
640						NA1305_(Thermoactinomycetaceae)	0	0	1	1	NA2255_(67-14)	1	0	0	1	NA128_(Bacillaceae)	0	0	1	1
641						NA1309_(67-14)	0	0	1	1	NA2266_(Thermomonosporaceae)	1	0	0	1	NA1285_([Eubacterium] coprostanoligenes group)	0	0	1	1
642						NA1310_(Geminicoccaceae)	0	0	1	1	NA229_(Carnobacteriaceae)	1	0	0	1	NA1287_(Bacillaceae)	0	0	1	1
643						NA1311_(Sporichthyaceae)	0	0	1	1	NA2296_(Muribaculaceae)	1	0	0	1	NA129_(Lachnospiraceae)	0	0	1	1
644						NA1313_(Beijerinckiaceae)	0	0	1	1	NA2299_(UCG-010)	1	0	0	1	NA13_(Bacillaceae)	0	0	1	1
645						NA1320_(AKIW781)	0	0	1	1	NA2304_(Planococcaceae)	1	0	0	1	NA1304_(Bacteroidales UCG-001)	0	0	1	1
646						NA1323_(Microtrichaceae)	0	0	1	1	NA2306_(W5053)	1	0	0	1	NA1305_(Thermoactinomycetaceae)	0	0	1	1
647						NA133_(W5053)	0	0	1	1	NA2314_(Rhodobacteraceae)	1	0	0	1	NA1308_(Streptomycetaceae)	0	0	1	1
648						NA1337_(67-14)	0	0	1	1	NA2328_(Oscillospiraceae)	1	0	0	1	NA1309_(67-14)	0	0	1	1
649						NA134_(Xanthomonadaceae)	0	0	1	1	NA233_(Micromonosporaceae)	1	0	0	1	NA131_(Isosphaeraceae)	0	0	1	1
650						NA1344_(AKIW781)	0	0	1	1	NA234_(Caulobacteraceae)	1	0	0	1	NA1310_(Geminicoccaceae)	0	0	1	1
651						NA1347_(67-14)	0	0	1	1	NA235_(Lachnospiraceae)	1	0	0	1	NA1311_(Sporichthyaceae)	0	0	1	1
652						NA1355_(Fimbriimonadaceae)	0	0	1	1	NA237_([Eubacterium] coprostanoligenes group)	1	0	0	1	NA1320_(AKIW781)	0	0	1	1
653						NA1358_(Symbiobacteraceae)	0	0	1	1	NA238_(Sphingomonadaceae)	1	0	0	1	NA1322_(Sphingomonadaceae)	0	0	1	1
654						NA1363_([Eubacterium] coprostanoligenes group)	0	0	1	1	NA2414_(Dermacoccaceae)	1	0	0	1	NA1327_(A4b)	0	0	1	1
655						NA1365_(Prolixibacteraceae)	0	0	1	1	NA243_(Enterobacteriaceae)	1	0	0	1	NA133_(W5053)	0	0	1	1
656						NA137_([Eubacterium] coprostanoligenes group)	0	0	1	1	NA245_(UCG-010)	1	0	0	1	NA1333_(Prevotellaceae)	0	0	1	1
657						NA1370_(Roseiflexaceae)	0	0	1	1	NA2455_(AB1)	1	0	0	1	NA134_(Xanthomonadaceae)	0	0	1	1
658						NA1371_(Paludibacteraceae)	0	0	1	1	NA246_(Rickettsiaceae)	1	0	0	1	NA1344_(AKIW781)	0	0	1	1
659						NA1374_(Tepidisphaeraceae)	0	0	1	1	NA248_(Prevotellaceae)	1	0	0	1	NA1347_(67-14)	0	0	1	1
660						NA1387_([Eubacterium] coprostanoligenes group)	0	0	1	1	NA25_(Comamonadaceae)	1	0	0	1	NA1358_(Symbiobacteraceae)	0	0	1	1
661						NA139_(Planococcaceae)	0	0	1	1	NA251_(Gallicola)	1	0	0	1	NA1363_([Eubacterium] coprostanoligenes group)	0	0	1	1
662						NA1394_(Vicinamibacteraceae)	0	0	1	1	NA2523_(Bacillaceae)	1	0	0	1	NA137_([Eubacterium] coprostanoligenes group)	0	0	1	1
663						NA14_(Lachnospiraceae)	0	0	1	1	NA253_(JG30-KF-CM45)	1	0	0	1	NA1372_(Erysipelotrichaceae)	0	0	1	1
664						NA140_(Phormidiaceae)	0	0	1	1	NA255_(Tannerellaceae)	1	0	0	1	NA1375_(Bacillaceae)	0	0	1	1
665						NA1407_(67-14)	0	0	1	1	NA256_(Coriobacteriales Incertae Sedis)	1	0	0	1	NA1378_(Longimicrobiaceae)	0	0	1	1
666						NA141_(JG30-KF-CM45)	0	0	1	1	NA2572_(Pirellulaceae)	1	0	0	1	NA1385_(Christensenellaceae)	0	0	1	1
667						NA142_(Streptomycetaceae)	0	0	1	1	NA26_(Ruminococcaceae)	1	0	0	1	NA1386_(Flavobacteriaceae)	0	0	1	1
668						NA1428_(Longimicrobiaceae)	0	0	1	1	NA264_(Tannerellaceae)	1	0	0	1	NA139_(Planococcaceae)	0	0	1	1
669						NA1434_(67-14)	0	0	1	1	NA267_(Ilumatobacteraceae)	1	0	0	1	NA1394_(Vicinamibacteraceae)	0	0	1	1
670						NA1446_(Sphingomonadaceae)	0	0	1	1	NA269_(Chitinophagaceae)	1	0	0	1	NA1395_(Lachnospiraceae)	0	0	1	1
671						NA1450_(Oligoflexus)	0	0	1	1	NA27_(Beijerinckiaceae)	1	0	0	1	NA1404_(Lachnospiraceae)	0	0	1	1
672						NA146_(Fastidiosipila)	0	0	1	1	NA272_(Beijerinckiaceae)	1	0	0	1	NA1407_(67-14)	0	0	1	1
673						NA147_(Sphingomonadaceae)	0	0	1	1	NA2728_(Cyclobacteriaceae)	1	0	0	1	NA1411_(WD2101 soil group)	0	0	1	1
674						NA1479_(Lachnospiraceae)	0	0	1	1	NA2746_(Lachnospiraceae)	1	0	0	1	NA142_(Streptomycetaceae)	0	0	1	1
675						NA149_(Bacteroidales RF16 group)	0	0	1	1	NA275_(Acetobacteraceae)	1	0	0	1	NA1420_(UCG-010)	0	0	1	1
676						NA1490_(Geminicoccaceae)	0	0	1	1	NA2753_(Nocardioidaceae)	1	0	0	1	NA1421_(Lachnospiraceae)	0	0	1	1
677						NA1491_(D05-2)	0	0	1	1	NA278_(Rhizobiaceae)	1	0	0	1	NA1428_(Longimicrobiaceae)	0	0	1	1
678						NA150_(JG30-KF-CM45)	0	0	1	1	NA279_(Peptostreptococcaceae)	1	0	0	1	NA1429_(Chitinophagaceae)	0	0	1	1
679						NA1501_(p-2534-18B5 gut group)	0	0	1	1	NA2810_(Muribaculaceae)	1	0	0	1	NA1430_(AKIW781)	0	0	1	1
680						NA1502_(Cyclobacteriaceae)	0	0	1	1	NA2854_(Pedosphaeraceae)	1	0	0	1	NA1434_(67-14)	0	0	1	1
681						NA151_(JG30-KF-CM45)	0	0	1	1	NA286_(Sphingomonadaceae)	1	0	0	1	NA1438_(Bacillaceae)	0	0	1	1
682						NA1512_(Longimicrobiaceae)	0	0	1	1	NA2876_(Ruminococcaceae)	1	0	0	1	NA144_(Acetobacteraceae)	0	0	1	1
683						NA152_(Geminicoccaceae)	0	0	1	1	NA2885_([Eubacterium] coprostanoligenes group)	1	0	0	1	NA1444_(Alcaligenaceae)	0	0	1	1
684						NA1530_(Sphingomonadaceae)	0	0	1	1	NA294_(Chitinophagaceae)	1	0	0	1	NA1446_(Sphingomonadaceae)	0	0	1	1
685						NA1539_(Peptococcaceae)	0	0	1	1	NA295_(Longimicrobiaceae)	1	0	0	1	NA146_(Fastidiosipila)	0	0	1	1
686						NA154_(Anaerococcus)	0	0	1	1	NA2961_(Rickettsiaceae)	1	0	0	1	NA1469_(Muribaculaceae)	0	0	1	1
687						NA1557_(67-14)	0	0	1	1	NA297_(Helcococcus)	1	0	0	1	NA1477_(Lachnospiraceae)	0	0	1	1
688						NA1559_(Ilumatobacteraceae)	0	0	1	1	NA298_(Rhizobiaceae)	1	0	0	1	NA148_(Comamonadaceae)	0	0	1	1
689						NA1560_(Rhodothermaceae)	0	0	1	1	NA3_(Planococcaceae)	1	0	0	1	NA1483_(AKIW781)	0	0	1	1
690						NA1564_(67-14)	0	0	1	1	NA3006_(Muribaculaceae)	1	0	0	1	NA1485_(Lachnospiraceae)	0	0	1	1
691						NA1565_(AKIW781)	0	0	1	1	NA304_(Isosphaeraceae)	1	0	0	1	NA149_(Bacteroidales RF16 group)	0	0	1	1
692						NA1566_(Myxococcaceae)	0	0	1	1	NA307_(Oscillospiraceae)	1	0	0	1	NA1492_(Oscillospiraceae)	0	0	1	1
693						NA1572_(JG30-KF-CM45)	0	0	1	1	NA311_(Rhodobacteraceae)	1	0	0	1	NA1493_(Prolixibacteraceae)	0	0	1	1
694						NA1575_(MWH-CFBk5)	0	0	1	1	NA3116_(Sphingomonadaceae)	1	0	0	1	NA1494_([Eubacterium] coprostanoligenes group)	0	0	1	1
695						NA1576_(F082)	0	0	1	1	NA312_(Bacillaceae)	1	0	0	1	NA1499_(Azospirillaceae)	0	0	1	1
696						NA158_(Tissierella)	0	0	1	1	NA314_(M2PB4-65 termite group)	1	0	0	1	NA150_(JG30-KF-CM45)	0	0	1	1
697						NA159_(Streptomycetaceae)	0	0	1	1	NA324_(Comamonadaceae)	1	0	0	1	NA1501_(p-2534-18B5 gut group)	0	0	1	1
698						NA1597_(Coleofasciculaceae)	0	0	1	1	NA3242_(Saprospiraceae)	1	0	0	1	NA1507_(Sphingomonadaceae)	0	0	1	1
699						NA16_(Ruminococcaceae)	0	0	1	1	NA325_(Planococcaceae)	1	0	0	1	NA151_(JG30-KF-CM45)	0	0	1	1
700						NA160_(Flavobacteriaceae)	0	0	1	1	NA326_(Ruminococcaceae)	1	0	0	1	NA1512_(Longimicrobiaceae)	0	0	1	1
701						NA1606_(Prevotellaceae)	0	0	1	1	NA329_(Lachnospiraceae)	1	0	0	1	NA1519_(JG30-KF-CM45)	0	0	1	1
702						NA1611_(BIrii41)	0	0	1	1	NA330_(Oscillospiraceae)	1	0	0	1	NA152_(Geminicoccaceae)	0	0	1	1
703						NA162_(Rhodobacteraceae)	0	0	1	1	NA331_(Rhizobiaceae)	1	0	0	1	NA1539_(Peptococcaceae)	0	0	1	1
704						NA1628_(Comamonadaceae)	0	0	1	1	NA334_(Isosphaeraceae)	1	0	0	1	NA154_(Anaerococcus)	0	0	1	1
705						NA163_(Comamonadaceae)	0	0	1	1	NA335_(Oligoflexus)	1	0	0	1	NA1563_(WD2101 soil group)	0	0	1	1
706						NA1635_(67-14)	0	0	1	1	NA337_(Isosphaeraceae)	1	0	0	1	NA1564_(67-14)	0	0	1	1
707						NA164_(Rhodobacteraceae)	0	0	1	1	NA338_(Beijerinckiaceae)	1	0	0	1	NA1565_(AKIW781)	0	0	1	1
708						NA1644_(Demequinaceae)	0	0	1	1	NA3386_(Lachnospiraceae)	1	0	0	1	NA1569_(UCG-010)	0	0	1	1
709						NA1649_(Bacillaceae)	0	0	1	1	NA3418_(JG30-KF-CM45)	1	0	0	1	NA1571_(Sphingobacteriaceae)	0	0	1	1
710						NA1659_(Lachnospiraceae)	0	0	1	1	NA343_(Ilumatobacteraceae)	1	0	0	1	NA1572_(JG30-KF-CM45)	0	0	1	1
711						NA166_(Xanthobacteraceae)	0	0	1	1	NA344_(Blastocatellaceae)	1	0	0	1	NA1575_(MWH-CFBk5)	0	0	1	1
712						NA1665_(JG30-KF-CM45)	0	0	1	1	NA348_(Caulobacteraceae)	1	0	0	1	NA1576_(F082)	0	0	1	1
713						NA167_(Guggenheimella)	0	0	1	1	NA35_(Oxalobacteraceae)	1	0	0	1	NA158_(Tissierella)	0	0	1	1
714						NA1670_(Lachnospiraceae)	0	0	1	1	NA351_(Microbacteriaceae)	1	0	0	1	NA159_(Streptomycetaceae)	0	0	1	1
715						NA168_(Staphylococcaceae)	0	0	1	1	NA353_(Lachnospiraceae)	1	0	0	1	NA160_(Flavobacteriaceae)	0	0	1	1
716						NA1681_(Sphingobacteriaceae)	0	0	1	1	NA356_(Lachnospiraceae)	1	0	0	1	NA1615_(Nitriliruptoraceae)	0	0	1	1
717						NA1686_(Gemmataceae)	0	0	1	1	NA36_(Chroococcidiopsaceae)	1	0	0	1	NA1616_(67-14)	0	0	1	1
718						NA1688_(WD2101 soil group)	0	0	1	1	NA362_(W5053)	1	0	0	1	NA1629_(WD2101 soil group)	0	0	1	1
719						NA1689_(Sphingomonadaceae)	0	0	1	1	NA3663_(Cytophagaceae)	1	0	0	1	NA1630_(AKIW781)	0	0	1	1
720						NA1699_(Gemmatimonadaceae)	0	0	1	1	NA369_(Oscillospiraceae)	1	0	0	1	NA1637_(Isosphaeraceae)	0	0	1	1
721						NA1703_(Isosphaeraceae)	0	0	1	1	NA37_(Rhodobacteraceae)	1	0	0	1	NA1638_(Lachnospiraceae)	0	0	1	1
722						NA1711_(Euzebyaceae)	0	0	1	1	NA370_(Anaerococcus)	1	0	0	1	NA164_(Rhodobacteraceae)	0	0	1	1
723						NA1718_(JG30-KF-CM45)	0	0	1	1	NA3711_(Muribaculaceae)	1	0	0	1	NA1644_(Demequinaceae)	0	0	1	1
724						NA173_(Bacillaceae)	0	0	1	1	NA378_(Solirubrobacteraceae)	1	0	0	1	NA1647_(Isosphaeraceae)	0	0	1	1
725						NA174_(Ruminococcaceae)	0	0	1	1	NA379_(Euzebyaceae)	1	0	0	1	NA1657_(Micromonosporaceae)	0	0	1	1
726						NA1744_(67-14)	0	0	1	1	NA380_(Lachnospiraceae)	1	0	0	1	NA1659_(Lachnospiraceae)	0	0	1	1
727						NA1750_(Ardenticatenaceae)	0	0	1	1	NA385_(Bacillaceae)	1	0	0	1	NA166_(Xanthobacteraceae)	0	0	1	1
728						NA1757_(Pedosphaeraceae)	0	0	1	1	NA386_(Sphingomonadaceae)	1	0	0	1	NA1662_(Paludibacteraceae)	0	0	1	1
729						NA1758_([Eubacterium] coprostanoligenes group)	0	0	1	1	NA39_(Chroococcidiopsaceae)	1	0	0	1	NA1665_(JG30-KF-CM45)	0	0	1	1
730						NA176_(Bacillaceae)	0	0	1	1	NA392_(Fodinicurvataceae)	1	0	0	1	NA167_(Guggenheimella)	0	0	1	1
731						NA1767_([Eubacterium] coprostanoligenes group)	0	0	1	1	NA393_(Lachnospiraceae)	1	0	0	1	NA1670_(Lachnospiraceae)	0	0	1	1
732						NA1768_(67-14)	0	0	1	1	NA397_(JG30-KF-CM45)	1	0	0	1	NA1673_(WD2101 soil group)	0	0	1	1
733						NA1774_(67-14)	0	0	1	1	NA398_(Micrococcaceae)	1	0	0	1	NA1677_(Xanthobacteraceae)	0	0	1	1
734						NA1776_(Ardenticatenaceae)	0	0	1	1	NA3990_(WD2101 soil group)	1	0	0	1	NA168_(Staphylococcaceae)	0	0	1	1
735						NA1778_(JG30-KF-CM45)	0	0	1	1	NA402_([Eubacterium] coprostanoligenes group)	1	0	0	1	NA1681_(Sphingobacteriaceae)	0	0	1	1
736						NA1782_(Microscillaceae)	0	0	1	1	NA404_(D05-2)	1	0	0	1	NA1682_(Isosphaeraceae)	0	0	1	1
737						NA1784_(WD2101 soil group)	0	0	1	1	NA405_(Bacillaceae)	1	0	0	1	NA1686_(Gemmataceae)	0	0	1	1
738						NA1788_(JG30-KF-CM45)	0	0	1	1	NA407_(Sphingomonadaceae)	1	0	0	1	NA169_(Lachnospiraceae)	0	0	1	1
739						NA1790_(Chroococcidiopsaceae)	0	0	1	1	NA408_(JG30-KF-CM45)	1	0	0	1	NA1699_(Gemmatimonadaceae)	0	0	1	1
740						NA1794_(Lachnospiraceae)	0	0	1	1	NA4094_(Parachlamydiaceae)	1	0	0	1	NA1704_(F082)	0	0	1	1
741						NA180_(Microbacteriaceae)	0	0	1	1	NA41_(Planococcaceae)	1	0	0	1	NA1707_([Eubacterium] coprostanoligenes group)	0	0	1	1
742						NA1800_(UCG-010)	0	0	1	1	NA410_([Eubacterium] coprostanoligenes group)	1	0	0	1	NA1718_(JG30-KF-CM45)	0	0	1	1
743						NA1808_(Bacillaceae)	0	0	1	1	NA42_(Oscillospiraceae)	1	0	0	1	NA172_(Polyangiaceae)	0	0	1	1
744						NA1809_(Verrucomicrobiaceae)	0	0	1	1	NA421_(Chitinophagaceae)	1	0	0	1	NA1724_(Lachnospiraceae)	0	0	1	1
745						NA1815_(AKIW781)	0	0	1	1	NA424_(Ruminococcaceae)	1	0	0	1	NA173_(Bacillaceae)	0	0	1	1
746						NA182_(JG30-KF-CM45)	0	0	1	1	NA4243_(Diplorickettsiaceae)	1	0	0	1	NA1731_(Ruminococcaceae)	0	0	1	1
747						NA1823_(WD2101 soil group)	0	0	1	1	NA429_(Lachnospiraceae)	1	0	0	1	NA1734_([Eubacterium] coprostanoligenes group)	0	0	1	1
748						NA1829_(Ruminiclostridium)	0	0	1	1	NA434_(Ruminococcaceae)	1	0	0	1	NA174_(Ruminococcaceae)	0	0	1	1
749						NA1837_([Eubacterium] coprostanoligenes group)	0	0	1	1	NA436_(Devosiaceae)	1	0	0	1	NA1743_(Carnobacteriaceae)	0	0	1	1
750						NA184_(Rhizobiaceae)	0	0	1	1	NA437_(Sphingomonadaceae)	1	0	0	1	NA1752_(Muribaculaceae)	0	0	1	1
751						NA1841_(Lachnospiraceae)	0	0	1	1	NA443_(Vicinamibacteraceae)	1	0	0	1	NA1757_(Pedosphaeraceae)	0	0	1	1
752						NA186_(Bacillaceae)	0	0	1	1	NA4433_(Roseiflexaceae)	1	0	0	1	NA1758_([Eubacterium] coprostanoligenes group)	0	0	1	1
753						NA1863_(AKIW781)	0	0	1	1	NA444_(Xanthobacteraceae)	1	0	0	1	NA176_(Bacillaceae)	0	0	1	1
754						NA1864_(JG30-KF-CM45)	0	0	1	1	NA446_(Rhizobiaceae)	1	0	0	1	NA1763_(Prolixibacteraceae)	0	0	1	1
755						NA1866_(AKIW781)	0	0	1	1	NA4469_(Lachnospiraceae)	1	0	0	1	NA1767_([Eubacterium] coprostanoligenes group)	0	0	1	1
756						NA1869_(JG30-KF-CM45)	0	0	1	1	NA449_(Vicinamibacteraceae)	1	0	0	1	NA1773_(AKIW781)	0	0	1	1
757						NA187_(JG30-KF-CM45)	0	0	1	1	NA45_(Micrococcaceae)	1	0	0	1	NA1774_(67-14)	0	0	1	1
758						NA1872_(Bacillaceae)	0	0	1	1	NA451_(Bacteroidales RF16 group)	1	0	0	1	NA1775_(Intrasporangiaceae)	0	0	1	1
759						NA1881_(Lachnospiraceae)	0	0	1	1	NA454_(Beijerinckiaceae)	1	0	0	1	NA1776_(Ardenticatenaceae)	0	0	1	1
760						NA1890_(Comamonadaceae)	0	0	1	1	NA4585_(Ruminococcaceae)	1	0	0	1	NA178_(Beijerinckiaceae)	0	0	1	1
761						NA1893_(UCG-010)	0	0	1	1	NA46_(Erysipelotrichaceae)	1	0	0	1	NA1781_(Solirubrobacteraceae)	0	0	1	1
762						NA19_(Micrococcaceae)	0	0	1	1	NA462_(UCG-010)	1	0	0	1	NA1784_(WD2101 soil group)	0	0	1	1
763						NA190_(JG30-KF-CM45)	0	0	1	1	NA4628_(Erysipelotrichaceae)	1	0	0	1	NA1792_(Erysipelotrichaceae)	0	0	1	1
764						NA1901_(67-14)	0	0	1	1	NA469_(Longimicrobiaceae)	1	0	0	1	NA1793_(Ercella)	0	0	1	1
765						NA192_(Planococcaceae)	0	0	1	1	NA47_(Bacillaceae)	1	0	0	1	NA1799_(Lachnospiraceae)	0	0	1	1
766						NA1923_(NS11-12 marine group)	0	0	1	1	NA4713_(Sphingomonadaceae)	1	0	0	1	NA180_(Microbacteriaceae)	0	0	1	1
767						NA195_(Intrasporangiaceae)	0	0	1	1	NA473_(Cellulomonadaceae)	1	0	0	1	NA1815_(AKIW781)	0	0	1	1
768						NA196_(Comamonadaceae)	0	0	1	1	NA475_(Lachnospiraceae)	1	0	0	1	NA1819_(Longimicrobiaceae)	0	0	1	1
769						NA1969_(JG30-KF-CM45)	0	0	1	1	NA48_(Lachnospiraceae)	1	0	0	1	NA182_(JG30-KF-CM45)	0	0	1	1
770						NA1976_(F082)	0	0	1	1	NA487_(AKAU3644)	1	0	0	1	NA1820_(67-14)	0	0	1	1
771						NA198_(Bacillaceae)	0	0	1	1	NA489_(Prevotellaceae)	1	0	0	1	NA1826_(Bacillaceae)	0	0	1	1
772						NA1981_(Rhizobiaceae)	0	0	1	1	NA5_(Micrococcaceae)	1	0	0	1	NA1833_(Lachnospiraceae)	0	0	1	1
773						NA1993_(Carnobacteriaceae)	0	0	1	1	NA507_(Rhizobiaceae)	1	0	0	1	NA1837_([Eubacterium] coprostanoligenes group)	0	0	1	1
774						NA20_(Lachnospiraceae)	0	0	1	1	NA511_(Oxalobacteraceae)	1	0	0	1	NA184_(Rhizobiaceae)	0	0	1	1
775						NA2001_(Bacillaceae)	0	0	1	1	NA522_(A4b)	1	0	0	1	NA1843_(Solirubrobacteraceae)	0	0	1	1
776						NA2005_([Eubacterium] coprostanoligenes group)	0	0	1	1	NA523_(Micrococcaceae)	1	0	0	1	NA1853_(Sphingomonadaceae)	0	0	1	1
777						NA201_(Sphingomonadaceae)	0	0	1	1	NA525_(Oligoflexus)	1	0	0	1	NA1854_(JG30-KF-CM45)	0	0	1	1
778						NA202_(Oxalobacteraceae)	0	0	1	1	NA533_(Ruminococcaceae)	1	0	0	1	NA1855_(Geminicoccaceae)	0	0	1	1
779						NA2025_(JG30-KF-CM45)	0	0	1	1	NA539_(Enterobacteriaceae)	1	0	0	1	NA186_(Bacillaceae)	0	0	1	1
780						NA2038_(67-14)	0	0	1	1	NA54_(Rhodobacteraceae)	1	0	0	1	NA187_(JG30-KF-CM45)	0	0	1	1
781						NA2052_(JG30-KF-CM45)	0	0	1	1	NA543_(Cellvibrionaceae)	1	0	0	1	NA188_(Oscillospiraceae)	0	0	1	1
782						NA206_(Streptomycetaceae)	0	0	1	1	NA545_(Oscillospiraceae)	1	0	0	1	NA1881_(Lachnospiraceae)	0	0	1	1
783						NA2073_(WD2101 soil group)	0	0	1	1	NA548_(Geminicoccaceae)	1	0	0	1	NA1884_(Muribaculaceae)	0	0	1	1
784						NA2096_(WD2101 soil group)	0	0	1	1	NA552_(Lachnospiraceae)	1	0	0	1	NA189_(Lachnospiraceae)	0	0	1	1
785						NA21_(Oxalobacteraceae)	0	0	1	1	NA553_(Lachnospiraceae)	1	0	0	1	NA19_(Micrococcaceae)	0	0	1	1
786						NA2100_(Planococcaceae)	0	0	1	1	NA563_(MWH-CFBk5)	1	0	0	1	NA190_(JG30-KF-CM45)	0	0	1	1
787						NA2112_([Eubacterium] coprostanoligenes group)	0	0	1	1	NA57_(Lachnospiraceae)	1	0	0	1	NA1901_(67-14)	0	0	1	1
788						NA2119_(Lachnospiraceae)	0	0	1	1	NA578_(Lachnospiraceae)	1	0	0	1	NA1911_(Erysipelatoclostridiaceae)	0	0	1	1
789						NA212_(Oligoflexus)	0	0	1	1	NA579_(Ruminococcaceae)	1	0	0	1	NA1912_(SC-I-84)	0	0	1	1
790						NA2121_(67-14)	0	0	1	1	NA58_(Comamonadaceae)	1	0	0	1	NA192_(Planococcaceae)	0	0	1	1
791						NA2139_(Acetobacteraceae)	0	0	1	1	NA581_(Vicinamibacteraceae)	1	0	0	1	NA1938_(Microtrichaceae)	0	0	1	1
792						NA214_(Lachnospiraceae)	0	0	1	1	NA583_(Christensenellaceae)	1	0	0	1	NA1945_(UCG-010)	0	0	1	1
793						NA2145_(WD2101 soil group)	0	0	1	1	NA590_(Comamonadaceae)	1	0	0	1	NA195_(Intrasporangiaceae)	0	0	1	1
794						NA2147_(AKIW781)	0	0	1	1	NA592_(Comamonadaceae)	1	0	0	1	NA1950_(Pseudonocardiaceae)	0	0	1	1
795						NA2157_(Micrococcaceae)	0	0	1	1	NA599_(Isosphaeraceae)	1	0	0	1	NA1958_(Anaerolineaceae)	0	0	1	1
796						NA2164_(Ardenticatenaceae)	0	0	1	1	NA601_(Lachnospiraceae)	1	0	0	1	NA1962_(Coriobacteriales Incertae Sedis)	0	0	1	1
797						NA2165_(TRA3-20)	0	0	1	1	NA604_(Rhizobiaceae)	1	0	0	1	NA1968_(Nitrosococcaceae)	0	0	1	1
798						NA217_(Intrasporangiaceae)	0	0	1	1	NA607_(Paludibacteraceae)	1	0	0	1	NA1969_(JG30-KF-CM45)	0	0	1	1
799						NA2187_(BIrii41)	0	0	1	1	NA609_(Prevotellaceae)	1	0	0	1	NA1976_(F082)	0	0	1	1
800						NA2188_(67-14)	0	0	1	1	NA611_(Intrasporangiaceae)	1	0	0	1	NA198_(Bacillaceae)	0	0	1	1
801						NA2195_(Microtrichaceae)	0	0	1	1	NA613_(Solirubrobacteraceae)	1	0	0	1	NA1986_(Rhizobiaceae)	0	0	1	1
802						NA220_(Oscillospiraceae)	0	0	1	1	NA614_(Tepidisphaeraceae)	1	0	0	1	NA1990_(UCG-010)	0	0	1	1
803						NA2208_(UCG-010)	0	0	1	1	NA615_(Oscillospiraceae)	1	0	0	1	NA1993_(Carnobacteriaceae)	0	0	1	1
804						NA222_(AKIW781)	0	0	1	1	NA616_(Rhizobiaceae)	1	0	0	1	NA1994_(Bacillaceae)	0	0	1	1
805						NA2228_(A4b)	0	0	1	1	NA62_(Rhizobiaceae)	1	0	0	1	NA200_(Sphingomonadaceae)	0	0	1	1
806						NA223_(Bacillaceae)	0	0	1	1	NA628_(Rhodobacteraceae)	1	0	0	1	NA2002_(Marinilabiliaceae)	0	0	1	1
807						NA2255_(67-14)	0	0	1	1	NA635_(Devosiaceae)	1	0	0	1	NA2005_([Eubacterium] coprostanoligenes group)	0	0	1	1
808						NA226_(Myxococcaceae)	0	0	1	1	NA64_(Planococcaceae)	1	0	0	1	NA2008_(UCG-010)	0	0	1	1
809						NA2260_(Nocardioidaceae)	0	0	1	1	NA645_(Myxococcaceae)	1	0	0	1	NA201_(Sphingomonadaceae)	0	0	1	1
810						NA2262_(Lachnospiraceae)	0	0	1	1	NA648_(Comamonadaceae)	1	0	0	1	NA2015_(Desulfocapsaceae)	0	0	1	1
811						NA2278_(WD2101 soil group)	0	0	1	1	NA65_(Ruminococcaceae)	1	0	0	1	NA202_(Oxalobacteraceae)	0	0	1	1
812						NA228_(JG30-KF-CM45)	0	0	1	1	NA650_(Lachnospiraceae)	1	0	0	1	NA2020_(Prevotellaceae)	0	0	1	1
813						NA2284_(JG30-KF-CM45)	0	0	1	1	NA66_(Bacillaceae)	1	0	0	1	NA2026_([Eubacterium] coprostanoligenes group)	0	0	1	1
814						NA2288_(JG30-KF-CM45)	0	0	1	1	NA661_(Lachnospiraceae)	1	0	0	1	NA204_(Sphingomonadaceae)	0	0	1	1
815						NA229_(Carnobacteriaceae)	0	0	1	1	NA662_(Cyclobacteriaceae)	1	0	0	1	NA2051_(AKIW781)	0	0	1	1
816						NA2298_(Saprospiraceae)	0	0	1	1	NA664_(Muribaculaceae)	1	0	0	1	NA206_(Streptomycetaceae)	0	0	1	1
817						NA2299_(UCG-010)	0	0	1	1	NA678_(Lachnospiraceae)	1	0	0	1	NA2074_(Bacillaceae)	0	0	1	1
818						NA231_(Nocardioidaceae)	0	0	1	1	NA69_(Lachnospiraceae)	1	0	0	1	NA2075_(Rhodothermaceae)	0	0	1	1
819						NA2329_(Succinivibrionaceae)	0	0	1	1	NA693_(Microbacteriaceae)	1	0	0	1	NA2085_(AKIW781)	0	0	1	1
820						NA233_(Micromonosporaceae)	0	0	1	1	NA70_(Rhodobacteraceae)	1	0	0	1	NA2098_(67-14)	0	0	1	1
821						NA2345_(AKIW781)	0	0	1	1	NA704_(Ruminococcaceae)	1	0	0	1	NA21_(Oxalobacteraceae)	0	0	1	1
822						NA2346_(Geodermatophilaceae)	0	0	1	1	NA705_(Isosphaeraceae)	1	0	0	1	NA2105_(67-14)	0	0	1	1
823						NA236_(Gemmatimonadaceae)	0	0	1	1	NA709_(Prevotellaceae)	1	0	0	1	NA2112_([Eubacterium] coprostanoligenes group)	0	0	1	1
824						NA237_([Eubacterium] coprostanoligenes group)	0	0	1	1	NA713_(Sporichthyaceae)	1	0	0	1	NA212_(Oligoflexus)	0	0	1	1
825						NA2373_(JG30-KF-CM45)	0	0	1	1	NA72_(Carnobacteriaceae)	1	0	0	1	NA2122_(Muribaculaceae)	0	0	1	1
826						NA2398_(Murdochiella)	0	0	1	1	NA724_(Chitinophagaceae)	1	0	0	1	NA213_(Beijerinckiaceae)	0	0	1	1
827						NA240_(Xanthomonadaceae)	0	0	1	1	NA725_(Ilumatobacteraceae)	1	0	0	1	NA2135_(UCG-010)	0	0	1	1
828						NA241_(UCG-010)	0	0	1	1	NA728_(Lachnospiraceae)	1	0	0	1	NA2141_(Longimicrobiaceae)	0	0	1	1
829						NA243_(Enterobacteriaceae)	0	0	1	1	NA730_(Muribaculaceae)	1	0	0	1	NA2147_(AKIW781)	0	0	1	1
830						NA244_(Promicromonosporaceae)	0	0	1	1	NA737_(Oscillospiraceae)	1	0	0	1	NA2154_(UCG-010)	0	0	1	1
831						NA2449_(Selenomonadaceae)	0	0	1	1	NA739_(Lachnospiraceae)	1	0	0	1	NA2168_(F082)	0	0	1	1
832						NA248_(Prevotellaceae)	0	0	1	1	NA745_(Myxococcaceae)	1	0	0	1	NA217_(Intrasporangiaceae)	0	0	1	1
833						NA25_(Comamonadaceae)	0	0	1	1	NA746_(Helcococcus)	1	0	0	1	NA2172_(Sphingomonadaceae)	0	0	1	1
834						NA250_(Planococcaceae)	0	0	1	1	NA747_(Bacteroidales RF16 group)	1	0	0	1	NA2188_(67-14)	0	0	1	1
835						NA2501_(JG30-KF-CM45)	0	0	1	1	NA762_(Microbacteriaceae)	1	0	0	1	NA2198_(AKIW781)	0	0	1	1
836						NA2502_(JG30-KF-CM45)	0	0	1	1	NA772_(Ruminococcaceae)	1	0	0	1	NA22_(Beijerinckiaceae)	0	0	1	1
837						NA2514_(Solirubrobacteraceae)	0	0	1	1	NA779_(Lachnospiraceae)	1	0	0	1	NA220_(Oscillospiraceae)	0	0	1	1
838						NA2515_(AKIW781)	0	0	1	1	NA78_(Lachnospiraceae)	1	0	0	1	NA2202_(67-14)	0	0	1	1
839						NA2516_(AKIW781)	0	0	1	1	NA780_(Lachnospiraceae)	1	0	0	1	NA2204_(Saccharofermentans)	0	0	1	1
840						NA253_(JG30-KF-CM45)	0	0	1	1	NA782_(Bacillaceae)	1	0	0	1	NA2206_(Ruminococcaceae)	0	0	1	1
841						NA2539_(UCG-010)	0	0	1	1	NA786_(JG30-KF-CM45)	1	0	0	1	NA2207_(Muribaculaceae)	0	0	1	1
842						NA254_(JG30-KF-CM45)	0	0	1	1	NA790_(Lachnospiraceae)	1	0	0	1	NA2210_(Moraxellaceae)	0	0	1	1
843						NA2547_(Bacteroidales BS11 gut group)	0	0	1	1	NA798_(Comamonadaceae)	1	0	0	1	NA2220_(Muribaculaceae)	0	0	1	1
844						NA2549_(WD2101 soil group)	0	0	1	1	NA81_(Planococcaceae)	1	0	0	1	NA2222_(67-14)	0	0	1	1
845						NA2550_(Longimicrobiaceae)	0	0	1	1	NA814_(Fodinicurvataceae)	1	0	0	1	NA2225_(p-251-o5)	0	0	1	1
846						NA2557_(Sphingobacteriaceae)	0	0	1	1	NA82_(Lachnospiraceae)	1	0	0	1	NA2227_(Lachnospiraceae)	0	0	1	1
847						NA2564_(Desulfovibrionaceae)	0	0	1	1	NA820_(Desulfovibrionaceae)	1	0	0	1	NA223_(Bacillaceae)	0	0	1	1
848						NA2568_(Longimicrobiaceae)	0	0	1	1	NA824_(Lachnospiraceae)	1	0	0	1	NA224_(Lachnospiraceae)	0	0	1	1
849						NA258_(Muribaculaceae)	0	0	1	1	NA825_(Prevotellaceae)	1	0	0	1	NA2242_(Lachnospiraceae)	0	0	1	1
850						NA259_(JG30-KF-CM45)	0	0	1	1	NA827_(Beijerinckiaceae)	1	0	0	1	NA2249_(Propionibacteriaceae)	0	0	1	1
851						NA2594_(Lachnospiraceae)	0	0	1	1	NA84_(Rhodobacteraceae)	1	0	0	1	NA225_(Lachnospiraceae)	0	0	1	1
852						NA2597_(Kineosporiaceae)	0	0	1	1	NA840_(Muribaculaceae)	1	0	0	1	NA226_(Myxococcaceae)	0	0	1	1
853						NA26_(Ruminococcaceae)	0	0	1	1	NA843_(Longimicrobiaceae)	1	0	0	1	NA2260_(Nocardioidaceae)	0	0	1	1
854						NA261_(Bacteroidales RF16 group)	0	0	1	1	NA849_(67-14)	1	0	0	1	NA2262_(Lachnospiraceae)	0	0	1	1
855						NA262_(Nocardioidaceae)	0	0	1	1	NA858_(Lachnospiraceae)	1	0	0	1	NA2267_(p-251-o5)	0	0	1	1
856						NA2622_(67-14)	0	0	1	1	NA862_(Euzebyaceae)	1	0	0	1	NA228_(JG30-KF-CM45)	0	0	1	1
857						NA263_(Microtrichaceae)	0	0	1	1	NA864_(Lachnospiraceae)	1	0	0	1	NA2281_(WD2101 soil group)	0	0	1	1
858						NA2634_(Microscillaceae)	0	0	1	1	NA87_(Enterobacteriaceae)	1	0	0	1	NA2284_(JG30-KF-CM45)	0	0	1	1
859						NA264_(Tannerellaceae)	0	0	1	1	NA873_(Comamonadaceae)	1	0	0	1	NA2288_(JG30-KF-CM45)	0	0	1	1
860						NA265_(Enterobacteriaceae)	0	0	1	1	NA875_(Prevotellaceae)	1	0	0	1	NA229_(Carnobacteriaceae)	0	0	1	1
861						NA2654_([Clostridium] methylpentosum group)	0	0	1	1	NA885_(Ruminococcaceae)	1	0	0	1	NA2299_(UCG-010)	0	0	1	1
862						NA267_(Ilumatobacteraceae)	0	0	1	1	NA89_(Lachnospiraceae)	1	0	0	1	NA2300_(UCG-010)	0	0	1	1
863						NA2672_(Flavobacteriaceae)	0	0	1	1	NA891_(Oscillospiraceae)	1	0	0	1	NA2301_(UCG-010)	0	0	1	1
864						NA2674_(WD2101 soil group)	0	0	1	1	NA896_(Devosiaceae)	1	0	0	1	NA2317_(Isosphaeraceae)	0	0	1	1
865						NA2675_(Ardenticatenaceae)	0	0	1	1	NA901_(Planococcaceae)	1	0	0	1	NA232_(Geodermatophilaceae)	0	0	1	1
866						NA268_(Rhodobacteraceae)	0	0	1	1	NA905_(Intrasporangiaceae)	1	0	0	1	NA2323_(TRA3-20)	0	0	1	1
867						NA269_(Chitinophagaceae)	0	0	1	1	NA908_(UCG-010)	1	0	0	1	NA2329_(Succinivibrionaceae)	0	0	1	1
868						NA270_(Chroococcidiopsaceae)	0	0	1	1	NA909_(Microscillaceae)	1	0	0	1	NA233_(Micromonosporaceae)	0	0	1	1
869						NA271_(JG30-KF-CM45)	0	0	1	1	NA91_(Microbacteriaceae)	1	0	0	1	NA234_(Caulobacteraceae)	0	0	1	1
870						NA2729_(AKIW781)	0	0	1	1	NA923_(Bacillaceae)	1	0	0	1	NA2344_(JG30-KF-CM45)	0	0	1	1
871						NA275_(Acetobacteraceae)	0	0	1	1	NA925_(Oscillospiraceae)	1	0	0	1	NA2345_(AKIW781)	0	0	1	1
872						NA276_(Bacillaceae)	0	0	1	1	NA926_(Lachnospiraceae)	1	0	0	1	NA235_(Lachnospiraceae)	0	0	1	1
873						NA277_(Chitinophagaceae)	0	0	1	1	NA927_(Longimicrobiaceae)	1	0	0	1	NA2357_(A4b)	0	0	1	1
874						NA2783_(Longimicrobiaceae)	0	0	1	1	NA933_([Eubacterium] coprostanoligenes group)	1	0	0	1	NA236_(Gemmatimonadaceae)	0	0	1	1
875						NA281_(Microbacteriaceae)	0	0	1	1	NA936_(Cellvibrionaceae)	1	0	0	1	NA2367_(UCG-010)	0	0	1	1
876						NA2812_(Euzebyaceae)	0	0	1	1	NA938_(Lachnospiraceae)	1	0	0	1	NA237_([Eubacterium] coprostanoligenes group)	0	0	1	1
877						NA2823_(Sandaracinaceae)	0	0	1	1	NA945_(JG30-KF-CM45)	1	0	0	1	NA2383_(Lachnospiraceae)	0	0	1	1
878						NA283_(Streptomycetaceae)	0	0	1	1	NA946_(UCG-010)	1	0	0	1	NA2386_(AKIW781)	0	0	1	1
879						NA2830_(UCG-010)	0	0	1	1	NA947_(Lachnospiraceae)	1	0	0	1	NA2391_(cvE6)	0	0	1	1
880						NA2836_(Isosphaeraceae)	0	0	1	1	NA95_(Beijerinckiaceae)	1	0	0	1	NA240_(Xanthomonadaceae)	0	0	1	1
881						NA284_(Bacillaceae)	0	0	1	1	NA952_(Rhodocyclaceae)	1	0	0	1	NA2406_(Christensenellaceae)	0	0	1	1
882						NA2842_(Cyclobacteriaceae)	0	0	1	1	NA960_([Eubacterium] coprostanoligenes group)	1	0	0	1	NA241_(UCG-010)	0	0	1	1
883						NA287_(Nocardioidaceae)	0	0	1	1	NA967_(Comamonadaceae)	1	0	0	1	NA2422_(Sphingomonadaceae)	0	0	1	1
884						NA288_(Longimicrobiaceae)	0	0	1	1	NA978_(Enterococcaceae)	1	0	0	1	NA2423_(Gemmataceae)	0	0	1	1
885						NA289_(Intrasporangiaceae)	0	0	1	1	NA986_(Bacillaceae)	1	0	0	1	NA243_(Enterobacteriaceae)	0	0	1	1
886						NA29_(Bacillaceae)	0	0	1	1	Neisseria	1	0	0	1	NA244_(Promicromonosporaceae)	0	0	1	1
887						NA291_(67-14)	0	0	1	1	Neo-b11	1	0	0	1	NA2449_(Selenomonadaceae)	0	0	1	1
888						NA292_(UCG-010)	0	0	1	1	Neomicrococcus	1	0	0	1	NA2475_([Eubacterium] coprostanoligenes group)	0	0	1	1
889						NA294_(Chitinophagaceae)	0	0	1	1	Nitriliruptor	1	0	0	1	NA248_(Prevotellaceae)	0	0	1	1
890						NA295_(Longimicrobiaceae)	0	0	1	1	Nodosilinea PCC-7104	1	0	0	1	NA2483_(F082)	0	0	1	1
891						NA2954_(AKIW781)	0	0	1	1	Oblitimonas	1	0	0	1	NA25_(Comamonadaceae)	0	0	1	1
892						NA2965_(PeH15)	0	0	1	1	Oceanicella	1	0	0	1	NA250_(Planococcaceae)	0	0	1	1
893						NA298_(Rhizobiaceae)	0	0	1	1	Oceanobacter	1	0	0	1	NA2502_(JG30-KF-CM45)	0	0	1	1
894						NA299_(Bacillaceae)	0	0	1	1	OLB8	1	0	0	1	NA251_(Gallicola)	0	0	1	1
895						NA2999_(Ruminococcaceae)	0	0	1	1	Ottowia	1	0	0	1	NA2515_(AKIW781)	0	0	1	1
896						NA300_(Microbacteriaceae)	0	0	1	1	Paenalcaligenes	1	0	0	1	NA252_(Sphingomonadaceae)	0	0	1	1
897						NA3009_(Muribaculaceae)	0	0	1	1	Paeniclostridium	1	0	0	1	NA253_(JG30-KF-CM45)	0	0	1	1
898						NA3012_(Isosphaeraceae)	0	0	1	1	Palleronia-Pseudomaribius	1	0	0	1	NA2533_(vadinBE97)	0	0	1	1
899						NA3022_(Fimbriimonadaceae)	0	0	1	1	Parapusillimonas	1	0	0	1	NA254_(JG30-KF-CM45)	0	0	1	1
900						NA3034_(67-14)	0	0	1	1	Peptococcus	1	0	0	1	NA2540_(Lachnospiraceae)	0	0	1	1
901						NA3048_(Saprospiraceae)	0	0	1	1	Phycicoccus	1	0	0	1	NA2542_(Bacillaceae)	0	0	1	1
902						NA309_(Anaerolineaceae)	0	0	1	1	Pigmentiphaga	1	0	0	1	NA255_(Tannerellaceae)	0	0	1	1
903						NA31_(Planococcaceae)	0	0	1	1	Pirellula	1	0	0	1	NA2553_(WD2101 soil group)	0	0	1	1
904						NA3104_(AKIW781)	0	0	1	1	Pisciglobus	1	0	0	1	NA256_(Coriobacteriales Incertae Sedis)	0	0	1	1
905						NA3105_(Solirubrobacteraceae)	0	0	1	1	Planctomicrobium	1	0	0	1	NA2579_(Unknown Family)	0	0	1	1
906						NA311_(Rhodobacteraceae)	0	0	1	1	Planktothrix NIVA-CYA 15	1	0	0	1	NA258_(Muribaculaceae)	0	0	1	1
907						NA3110_(Pirellulaceae)	0	0	1	1	Pontibaca	1	0	0	1	NA2592_(Oscillospiraceae)	0	0	1	1
908						NA3130_(UCG-010)	0	0	1	1	Porphyromonas	1	0	0	1	NA2600_(Saccharofermentans)	0	0	1	1
909						NA314_(M2PB4-65 termite group)	0	0	1	1	Procabacter	1	0	0	1	NA2601_(JG30-KF-CM45)	0	0	1	1
910						NA317_(Peptococcaceae)	0	0	1	1	Proteus	1	0	0	1	NA261_(Bacteroidales RF16 group)	0	0	1	1
911						NA3175_(Symbiobacteraceae)	0	0	1	1	Pseudaminobacter	1	0	0	1	NA2610_(Anaerolineaceae)	0	0	1	1
912						NA3176_(JG30-KF-CM45)	0	0	1	1	Pseudarcobacter	1	0	0	1	NA2616_(Rhodobacteraceae)	0	0	1	1
913						NA319_(Planococcaceae)	0	0	1	1	Pseudocitrobacter	1	0	0	1	NA2617_(AKYG1722)	0	0	1	1
914						NA32_(Planococcaceae)	0	0	1	1	Pseudoflavonifractor	1	0	0	1	NA262_(Nocardioidaceae)	0	0	1	1
915						NA3203_(AKIW781)	0	0	1	1	Pseudohongiella	1	0	0	1	NA2623_(Rickettsiaceae)	0	0	1	1
916						NA321_(Micromonosporaceae)	0	0	1	1	Pseudorhodoferax	1	0	0	1	NA263_(Microtrichaceae)	0	0	1	1
917						NA322_(Bacillaceae)	0	0	1	1	Puia	1	0	0	1	NA264_(Tannerellaceae)	0	0	1	1
918						NA3252_(UCG-010)	0	0	1	1	Pusillimonas	1	0	0	1	NA265_(Enterobacteriaceae)	0	0	1	1
919						NA327_([Eubacterium] coprostanoligenes group)	0	0	1	1	Rathayibacter	1	0	0	1	NA2651_(Muribaculaceae)	0	0	1	1
920						NA3270_(Caldilineaceae)	0	0	1	1	Rhizobacter	1	0	0	1	NA2655_(Lachnospiraceae)	0	0	1	1
921						NA3273_(Longimicrobiaceae)	0	0	1	1	Rhodoferax	1	0	0	1	NA267_(Ilumatobacteraceae)	0	0	1	1
922						NA329_(Lachnospiraceae)	0	0	1	1	Riemerella	1	0	0	1	NA2674_(WD2101 soil group)	0	0	1	1
923						NA3291_(Geodermatophilaceae)	0	0	1	1	Rikenella	1	0	0	1	NA2677_(JG30-KF-CM45)	0	0	1	1
924						NA332_([Eubacterium] coprostanoligenes group)	0	0	1	1	Rothia	1	0	0	1	NA268_(Rhodobacteraceae)	0	0	1	1
925						NA334_(Isosphaeraceae)	0	0	1	1	Rummeliibacillus	1	0	0	1	NA269_(Chitinophagaceae)	0	0	1	1
926						NA3344_(WD2101 soil group)	0	0	1	1	Salmonella	1	0	0	1	NA27_(Beijerinckiaceae)	0	0	1	1
927						NA3349_(Muribaculaceae)	0	0	1	1	Serinicoccus	1	0	0	1	NA270_(Chroococcidiopsaceae)	0	0	1	1
928						NA3354_(Anaerolineaceae)	0	0	1	1	Sorangium	1	0	0	1	NA271_(JG30-KF-CM45)	0	0	1	1
929						NA3355_(AKIW781)	0	0	1	1	Spirillospora	1	0	0	1	NA272_(Beijerinckiaceae)	0	0	1	1
930						NA3358_(Pedosphaeraceae)	0	0	1	1	Spirosoma	1	0	0	1	NA2729_(AKIW781)	0	0	1	1
931						NA337_(Isosphaeraceae)	0	0	1	1	Subtercola	1	0	0	1	NA275_(Acetobacteraceae)	0	0	1	1
932						NA338_(Beijerinckiaceae)	0	0	1	1	Succinatimonas	1	0	0	1	NA276_(Bacillaceae)	0	0	1	1
933						NA3388_(Ercella)	0	0	1	1	Succinivibrionaceae UCG-001	1	0	0	1	NA2766_(UCG-010)	0	0	1	1
934						NA343_(Ilumatobacteraceae)	0	0	1	1	Sulfurovum	1	0	0	1	NA277_(Chitinophagaceae)	0	0	1	1
935						NA347_(Burkholderiaceae)	0	0	1	1	Synechococcus CC9902	1	0	0	1	NA278_(Rhizobiaceae)	0	0	1	1
936						NA3474_(Longimicrobiaceae)	0	0	1	1	Synergistes	1	0	0	1	NA2787_(Chroococcidiopsaceae)	0	0	1	1
937						NA3478_(Rhodobacteraceae)	0	0	1	1	Tardiphaga	1	0	0	1	NA2808_(UCG-010)	0	0	1	1
938						NA348_(Caulobacteraceae)	0	0	1	1	Tatumella	1	0	0	1	NA281_(Microbacteriaceae)	0	0	1	1
939						NA35_(Oxalobacteraceae)	0	0	1	1	Tepidibacillus	1	0	0	1	NA2811_(Erysipelotrichaceae)	0	0	1	1
940						NA3524_(Vicinamibacteraceae)	0	0	1	1	Terrisporobacter	1	0	0	1	NA283_(Streptomycetaceae)	0	0	1	1
941						NA353_(Lachnospiraceae)	0	0	1	1	Tetrasphaera	1	0	0	1	NA284_(Bacillaceae)	0	0	1	1
942						NA355_(Rhizobiaceae)	0	0	1	1	Thauera	1	0	0	1	NA2844_(Leptotrichiaceae)	0	0	1	1
943						NA356_(Lachnospiraceae)	0	0	1	1	Trichormus HINDAK 2001-4	1	0	0	1	NA2845_(Rhizobiaceae)	0	0	1	1
944						NA3565_(Longimicrobiaceae)	0	0	1	1	UCG-007	1	0	0	1	NA286_(Sphingomonadaceae)	0	0	1	1
945						NA357_([Eubacterium] coprostanoligenes group)	0	0	1	1	Ulvibacter	1	0	0	1	NA2866_(Chitinophagaceae)	0	0	1	1
946						NA358_(Pseudonocardiaceae)	0	0	1	1	Variovorax	1	0	0	1	NA287_(Nocardioidaceae)	0	0	1	1
947						NA360_(Kineosporiaceae)	0	0	1	1	Verrucosispora	1	0	0	1	NA288_(Longimicrobiaceae)	0	0	1	1
948						NA362_(W5053)	0	0	1	1	Victivallis	1	0	0	1	NA289_(Intrasporangiaceae)	0	0	1	1
949						NA363_(UCG-010)	0	0	1	1	WCHB1-32	1	0	0	1	NA29_(Bacillaceae)	0	0	1	1
950						NA3705_(Marinilabiliaceae)	0	0	1	1	Wilmottia Ant-Ph58	1	0	0	1	NA291_(67-14)	0	0	1	1
951						NA3710_(Lachnospiraceae)	0	0	1	1	Xylophilus	1	0	0	1	NA292_(UCG-010)	0	0	1	1
952						NA3735_(Pirellulaceae)	0	0	1	1	Zoogloea	1	0	0	1	NA2920_(Lachnospiraceae)	0	0	1	1
953						NA3759_(JG30-KF-CM45)	0	0	1	1	Brevibacterium	0	0	11	11	NA294_(Chitinophagaceae)	0	0	1	1
954						NA377_(Vicinamibacteraceae)	0	0	1	1	Ornithinicoccus	0	0	6	6	NA2947_(AKIW781)	0	0	1	1
955						NA3770_(MWH-CFBk5)	0	0	1	1	Marinobacter	0	0	4	4	NA2954_(AKIW781)	0	0	1	1
956						NA3771_(67-14)	0	0	1	1	PMMR1	0	0	4	4	NA297_(Helcococcus)	0	0	1	1
957						NA378_(Solirubrobacteraceae)	0	0	1	1	Saccharomonospora	0	0	4	4	NA2977_(67-14)	0	0	1	1
958						NA379_(Euzebyaceae)	0	0	1	1	UCG-002	0	0	4	4	NA2979_([Eubacterium] coprostanoligenes group)	0	0	1	1
959						NA381_(Rhodobacteraceae)	0	0	1	1	Lachnospiraceae NK3A20 group	0	1	3	4	NA298_(Rhizobiaceae)	0	0	1	1
960						NA384_(Cellvibrionaceae)	0	0	1	1	Amphibacillus	0	0	3	3	NA299_(Bacillaceae)	0	0	1	1
961						NA3859_(Parachlamydiaceae)	0	0	1	1	Caryophanon	0	0	3	3	NA3_(Planococcaceae)	0	0	1	1
962						NA386_(Sphingomonadaceae)	0	0	1	1	Erysipelothrix	0	0	3	3	NA300_(Microbacteriaceae)	0	0	1	1
963						NA387_(JG30-KF-CM45)	0	0	1	1	Gracilibacillus	0	0	3	3	NA3020_(67-14)	0	0	1	1
964						NA39_(Chroococcidiopsaceae)	0	0	1	1	Mogibacterium	0	0	3	3	NA3021_(Roseiflexaceae)	0	0	1	1
965						NA391_(JG30-KF-CM45)	0	0	1	1	Prauserella	0	0	3	3	NA3036_(Isosphaeraceae)	0	0	1	1
966						NA392_(Fodinicurvataceae)	0	0	1	1	Ruania	0	0	3	3	NA307_(Oscillospiraceae)	0	0	1	1
967						NA394_(Micromonosporaceae)	0	0	1	1	Saccharothrix	0	0	3	3	NA309_(Anaerolineaceae)	0	0	1	1
968						NA395_(WD2101 soil group)	0	0	1	1	Thermomonas	0	0	3	3	NA31_(Planococcaceae)	0	0	1	1
969						NA398_(Micrococcaceae)	0	0	1	1	Ammoniphilus	0	1	2	3	NA3104_(AKIW781)	0	0	1	1
970						NA401_(WD2101 soil group)	0	0	1	1	Isoptericola	0	1	2	3	NA3105_(Solirubrobacteraceae)	0	0	1	1
971						NA4026_(Ardenticatenaceae)	0	0	1	1	Anoxybacillus	0	0	2	2	NA311_(Rhodobacteraceae)	0	0	1	1
972						NA404_(D05-2)	0	0	1	1	Aurantisolimonas	0	0	2	2	NA313_(Geminicoccaceae)	0	0	1	1
973						NA4044_(Paludibacteraceae)	0	0	1	1	Cavicella	0	0	2	2	NA314_(M2PB4-65 termite group)	0	0	1	1
974						NA4060_(Simkaniaceae)	0	0	1	1	Desulfobulbus	0	0	2	2	NA3154_(Muribaculaceae)	0	0	1	1
975						NA408_(JG30-KF-CM45)	0	0	1	1	Ellin6067	0	0	2	2	NA317_(Peptococcaceae)	0	0	1	1
976						NA4083_(67-14)	0	0	1	1	Erysipelotrichaceae UCG-002	0	0	2	2	NA3182_(AKIW781)	0	0	1	1
977						NA41_(Planococcaceae)	0	0	1	1	Fermentimonas	0	0	2	2	NA3185_(Pirellulaceae)	0	0	1	1
978						NA410_([Eubacterium] coprostanoligenes group)	0	0	1	1	Haloactinopolyspora	0	0	2	2	NA3186_(UCG-010)	0	0	1	1
979						NA4100_(BBMC-4)	0	0	1	1	Janibacter	0	0	2	2	NA3187_(AKIW781)	0	0	1	1
980						NA4102_(Blastocatellaceae)	0	0	1	1	Kribbella	0	0	2	2	NA319_(Planococcaceae)	0	0	1	1
981						NA413_(Isosphaeraceae)	0	0	1	1	Lachnospiraceae UCG-009	0	0	2	2	NA32_(Planococcaceae)	0	0	1	1
982						NA416_(Intrasporangiaceae)	0	0	1	1	Methylotenera	0	0	2	2	NA320_(AKIW781)	0	0	1	1
983						NA417_(JG30-KF-CM45)	0	0	1	1	mle1-7	0	0	2	2	NA321_(Micromonosporaceae)	0	0	1	1
984						NA4177_(cvE6)	0	0	1	1	Nevskia	0	0	2	2	NA322_(Bacillaceae)	0	0	1	1
985						NA418_(Pseudonocardiaceae)	0	0	1	1	Novibacillus	0	0	2	2	NA325_(Planococcaceae)	0	0	1	1
986						NA42_(Oscillospiraceae)	0	0	1	1	Paenisporosarcina	0	0	2	2	NA326_(Ruminococcaceae)	0	0	1	1
987						NA420_(WD2101 soil group)	0	0	1	1	Porphyrobacter	0	0	2	2	NA3276_(Sporichthyaceae)	0	0	1	1
988						NA422_(Lachnospiraceae)	0	0	1	1	Pseudoxanthomonas	0	0	2	2	NA3278_(Acetobacteraceae)	0	0	1	1
989						NA4286_(Roseiflexaceae)	0	0	1	1	Sanguibacter	0	0	2	2	NA328_(D05-2)	0	0	1	1
990						NA429_(Lachnospiraceae)	0	0	1	1	SM1A02	0	0	2	2	NA3288_(Fastidiosipila)	0	0	1	1
991						NA4329_(Spirosomaceae)	0	0	1	1	Thalassobacillus	0	0	2	2	NA329_(Lachnospiraceae)	0	0	1	1
992						NA433_(Blastocatellaceae)	0	0	1	1	TM7a	0	0	2	2	NA330_(Oscillospiraceae)	0	0	1	1
993						NA435_(Rhizobiaceae)	0	0	1	1	[Bacteroides] pectinophilus group	0	0	1	1	NA3306_(Flavobacteriaceae)	0	0	1	1
994						NA441_(Muribaculaceae)	0	0	1	1	[Eubacterium] siraeum group	0	0	1	1	NA331_(Rhizobiaceae)	0	0	1	1
995						NA443_(Vicinamibacteraceae)	0	0	1	1	[Eubacterium] xylanophilum group	0	0	1	1	NA332_([Eubacterium] coprostanoligenes group)	0	0	1	1
996						NA4448_(Bacillaceae)	0	0	1	1	1959-1	0	0	1	1	NA333_(Acetobacteraceae)	0	0	1	1
997						NA4452_(D05-2)	0	0	1	1	Acholeplasma	0	0	1	1	NA3362_(67-14)	0	0	1	1
998						NA4453_(Oligoflexus)	0	0	1	1	Acidaminobacter	0	0	1	1	NA337_(Isosphaeraceae)	0	0	1	1
999						NA4457_(Sandaracinaceae)	0	0	1	1	Acidiphilium	0	0	1	1	NA3370_(Ezakiella)	0	0	1	1
1000						NA449_(Vicinamibacteraceae)	0	0	1	1	Actinocorallia	0	0	1	1	NA338_(Beijerinckiaceae)	0	0	1	1
1001						NA45_(Micrococcaceae)	0	0	1	1	Aestuariicella	0	0	1	1	NA339_(Ruminococcaceae)	0	0	1	1
1002						NA450_(F082)	0	0	1	1	Agrococcus	0	0	1	1	NA343_(Ilumatobacteraceae)	0	0	1	1
1003						NA451_(Bacteroidales RF16 group)	0	0	1	1	Alcaligenes	0	0	1	1	NA347_(Burkholderiaceae)	0	0	1	1
1004						NA455_(Caulobacteraceae)	0	0	1	1	Aliifodinibius	0	0	1	1	NA348_(Caulobacteraceae)	0	0	1	1
1005						NA458_(Planococcaceae)	0	0	1	1	Alishewanella	0	0	1	1	NA35_(Oxalobacteraceae)	0	0	1	1
1006						NA459_(Chitinophagaceae)	0	0	1	1	Alkalibacter	0	0	1	1	NA3502_(Oscillospiraceae)	0	0	1	1
1007						NA461_(Oxalobacteraceae)	0	0	1	1	alphaI cluster	0	0	1	1	NA351_(Microbacteriaceae)	0	0	1	1
1008						NA462_(UCG-010)	0	0	1	1	Anaerobacillus	0	0	1	1	NA3528_(Silvanigrellaceae)	0	0	1	1
1009						NA463_(Ruminococcaceae)	0	0	1	1	Anaerolinea	0	0	1	1	NA353_(Lachnospiraceae)	0	0	1	1
1010						NA467_(Streptomycetaceae)	0	0	1	1	Anaeroplasma	0	0	1	1	NA3539_(Balneolaceae)	0	0	1	1
1011						NA469_(Longimicrobiaceae)	0	0	1	1	Anaerovorax	0	0	1	1	NA355_(Rhizobiaceae)	0	0	1	1
1012						NA4692_(Phycisphaeraceae)	0	0	1	1	Apibacter	0	0	1	1	NA3555_(Cellvibrionaceae)	0	0	1	1
1013						NA471_(Sporichthyaceae)	0	0	1	1	Arboricoccus	0	0	1	1	NA356_(Lachnospiraceae)	0	0	1	1
1014						NA472_(AKIW781)	0	0	1	1	Arsenicitalea	0	0	1	1	NA357_([Eubacterium] coprostanoligenes group)	0	0	1	1
1015						NA481_(JG30-KF-CM45)	0	0	1	1	Azovibrio	0	0	1	1	NA358_(Pseudonocardiaceae)	0	0	1	1
1016						NA483_(Myxococcaceae)	0	0	1	1	Bauldia	0	0	1	1	NA3589_(Tissierella)	0	0	1	1
1017						NA487_(AKAU3644)	0	0	1	1	Bdellovibrio	0	0	1	1	NA3595_(UCG-010)	0	0	1	1
1018						NA488_(Chroococcidiopsaceae)	0	0	1	1	Bergeyella	0	0	1	1	NA3596_(vadinBE97)	0	0	1	1
1019						NA492_(Rhodobacteraceae)	0	0	1	1	Blastomonas	0	0	1	1	NA36_(Chroococcidiopsaceae)	0	0	1	1
1020						NA494_(Bacteroidales RF16 group)	0	0	1	1	Bogoriella	0	0	1	1	NA360_(Kineosporiaceae)	0	0	1	1
1021						NA497_(Isosphaeraceae)	0	0	1	1	Brevibacillus	0	0	1	1	NA3601_(WD2101 soil group)	0	0	1	1
1022						NA499_(Geminicoccaceae)	0	0	1	1	Candidatus Captivus	0	0	1	1	NA362_(W5053)	0	0	1	1
1023						NA5_(Micrococcaceae)	0	0	1	1	Candidatus Moranella	0	0	1	1	NA363_(UCG-010)	0	0	1	1
1024						NA500_(Planococcaceae)	0	0	1	1	Candidatus Udaeobacter	0	0	1	1	NA3633_(UCG-010)	0	0	1	1
1025						NA502_(WD2101 soil group)	0	0	1	1	Candidatus Xiphinematobacter	0	0	1	1	NA367_(Bacteroidales RF16 group)	0	0	1	1
1026						NA504_(AKIW781)	0	0	1	1	Candidimonas	0	0	1	1	NA371_(Fodinicurvataceae)	0	0	1	1
1027						NA506_(Carnobacteriaceae)	0	0	1	1	Carnimonas	0	0	1	1	NA3716_(Lachnospiraceae)	0	0	1	1
1028						NA507_(Rhizobiaceae)	0	0	1	1	Catellatospora	0	0	1	1	NA3754_(NS9 marine group)	0	0	1	1
1029						NA509_(Streptomycetaceae)	0	0	1	1	Chishuiella	0	0	1	1	NA377_(Vicinamibacteraceae)	0	0	1	1
1030						NA51_(Carnobacteriaceae)	0	0	1	1	Chthonobacter	0	0	1	1	NA378_(Solirubrobacteraceae)	0	0	1	1
1031						NA510_(Rhizobiaceae)	0	0	1	1	Clostridium sensu stricto 10	0	0	1	1	NA380_(Lachnospiraceae)	0	0	1	1
1032						NA511_(Oxalobacteraceae)	0	0	1	1	Cohnella	0	0	1	1	NA381_(Rhodobacteraceae)	0	0	1	1
1033						NA512_(Acetobacteraceae)	0	0	1	1	Collinsella	0	0	1	1	NA3824_(UCG-010)	0	0	1	1
1034						NA513_(Geodermatophilaceae)	0	0	1	1	Commensalibacter	0	0	1	1	NA384_(Cellvibrionaceae)	0	0	1	1
1035						NA514_(Chroococcidiopsaceae)	0	0	1	1	Coriobacteriaceae UCG-002	0	0	1	1	NA3844_(AKIW781)	0	0	1	1
1036						NA518_(Aerococcaceae)	0	0	1	1	Couchioplanes	0	0	1	1	NA385_(Bacillaceae)	0	0	1	1
1037						NA519_(67-14)	0	0	1	1	CPla-4 termite group	0	0	1	1	NA386_(Sphingomonadaceae)	0	0	1	1
1038						NA52_(Bacillaceae)	0	0	1	1	Cryptosporangium	0	0	1	1	NA387_(JG30-KF-CM45)	0	0	1	1
1039						NA520_(Acetobacteraceae)	0	0	1	1	Curvibacter	0	0	1	1	NA3892_(Bacteroidetes BD2-2)	0	0	1	1
1040						NA528_(67-14)	0	0	1	1	Cystobacter	0	0	1	1	NA390_(JG30-KF-CM45)	0	0	1	1
1041						NA529_(Solirubrobacteraceae)	0	0	1	1	Defluviimonas	0	0	1	1	NA3911_(Gemmataceae)	0	0	1	1
1042						NA531_(Streptomycetaceae)	0	0	1	1	Desertibacter	0	0	1	1	NA392_(Fodinicurvataceae)	0	0	1	1
1043						NA539_(Enterobacteriaceae)	0	0	1	1	Desulfomonile	0	0	1	1	NA3937_(AKIW781)	0	0	1	1
1044						NA540_(67-14)	0	0	1	1	DEV114	0	0	1	1	NA3939_(Oscillospiraceae)	0	0	1	1
1045						NA545_(Oscillospiraceae)	0	0	1	1	Diplosphaera	0	0	1	1	NA394_(Micromonosporaceae)	0	0	1	1
1046						NA548_(Geminicoccaceae)	0	0	1	1	DSSF69	0	0	1	1	NA395_(WD2101 soil group)	0	0	1	1
1047						NA549_(67-14)	0	0	1	1	Dysgonomonas	0	0	1	1	NA396_(JG30-KF-CM45)	0	0	1	1
1048						NA55_(Intrasporangiaceae)	0	0	1	1	Egicoccus	0	0	1	1	NA3961_(Cyclobacteriaceae)	0	0	1	1
1049						NA553_(Lachnospiraceae)	0	0	1	1	Elusimicrobium	0	0	1	1	NA397_(JG30-KF-CM45)	0	0	1	1
1050						NA554_(Gemmatimonadaceae)	0	0	1	1	Endobacter	0	0	1	1	NA398_(Micrococcaceae)	0	0	1	1
1051						NA557_(Ilumatobacteraceae)	0	0	1	1	Erysipelotrichaceae UCG-003	0	0	1	1	NA401_(WD2101 soil group)	0	0	1	1
1052						NA56_(Pseudonocardiaceae)	0	0	1	1	Erysipelotrichaceae UCG-007	0	0	1	1	NA402_([Eubacterium] coprostanoligenes group)	0	0	1	1
1053						NA561_([Eubacterium] coprostanoligenes group)	0	0	1	1	Erysipelotrichaceae UCG-009	0	0	1	1	NA4036_(Alteromonadaceae)	0	0	1	1
1054						NA562_(Ruminococcaceae)	0	0	1	1	Faecalibaculum	0	0	1	1	NA405_(Bacillaceae)	0	0	1	1
1055						NA566_(Lachnospiraceae)	0	0	1	1	Fimbriiglobus	0	0	1	1	NA4058_(Limnochordaceae)	0	0	1	1
1056						NA569_(JG30-KF-CM45)	0	0	1	1	Fontibacter	0	0	1	1	NA4065_(Rikenellaceae)	0	0	1	1
1057						NA578_(Lachnospiraceae)	0	0	1	1	Gordonia	0	0	1	1	NA407_(Sphingomonadaceae)	0	0	1	1
1058						NA58_(Comamonadaceae)	0	0	1	1	Halobacillus	0	0	1	1	NA408_(JG30-KF-CM45)	0	0	1	1
1059						NA580_(JG30-KF-CM45)	0	0	1	1	Halolactibacillus	0	0	1	1	NA4080_(Ruminococcaceae)	0	0	1	1
1060						NA581_(Vicinamibacteraceae)	0	0	1	1	Hirschia	0	0	1	1	NA4092_(Longimicrobiaceae)	0	0	1	1
1061						NA585_(Bacillaceae)	0	0	1	1	Holdemanella	0	0	1	1	NA4095_(Gemmataceae)	0	0	1	1
1062						NA587_(Xanthomonadaceae)	0	0	1	1	Ilumatobacter	0	0	1	1	NA4096_(Cyclobacteriaceae)	0	0	1	1
1063						NA588_(Fastidiosipila)	0	0	1	1	Jeotgalibacillus	0	0	1	1	NA41_(Planococcaceae)	0	0	1	1
1064						NA590_(Comamonadaceae)	0	0	1	1	JGI 0001001-H03	0	0	1	1	NA410_([Eubacterium] coprostanoligenes group)	0	0	1	1
1065						NA594_(Rhizobiaceae)	0	0	1	1	Jonesia	0	0	1	1	NA413_(Isosphaeraceae)	0	0	1	1
1066						NA598_(JG30-KF-CM45)	0	0	1	1	Kallotenue	0	0	1	1	NA415_(Isosphaeraceae)	0	0	1	1
1067						NA6_(Staphylococcaceae)	0	0	1	1	Kibdelosporangium	0	0	1	1	NA416_(Intrasporangiaceae)	0	0	1	1
1068						NA603_(Prolixibacteraceae)	0	0	1	1	Laceyella	0	0	1	1	NA417_(JG30-KF-CM45)	0	0	1	1
1069						NA607_(Paludibacteraceae)	0	0	1	1	Lewinella	0	0	1	1	NA418_(Pseudonocardiaceae)	0	0	1	1
1070						NA608_([Eubacterium] coprostanoligenes group)	0	0	1	1	Limnohabitans	0	0	1	1	NA4191_(AKIW781)	0	0	1	1
1071						NA61_(Comamonadaceae)	0	0	1	1	Lunatimonas	0	0	1	1	NA420_(WD2101 soil group)	0	0	1	1
1072						NA611_(Intrasporangiaceae)	0	0	1	1	Luteibacter	0	0	1	1	NA422_(Lachnospiraceae)	0	0	1	1
1073						NA612_(67-14)	0	0	1	1	Luteitalea	0	0	1	1	NA427_(Sphingomonadaceae)	0	0	1	1
1074						NA613_(Solirubrobacteraceae)	0	0	1	1	Macellibacteroides	0	0	1	1	NA429_(Lachnospiraceae)	0	0	1	1
1075						NA619_([Eubacterium] coprostanoligenes group)	0	0	1	1	Mannheimia	0	0	1	1	NA4295_(Unknown Family)	0	0	1	1
1076						NA62_(Rhizobiaceae)	0	0	1	1	Marinimicrobium	0	0	1	1	NA4296_(A4b)	0	0	1	1
1077						NA624_(Longimicrobiaceae)	0	0	1	1	Marinococcus	0	0	1	1	NA4297_(A4b)	0	0	1	1
1078						NA629_(Ruminococcaceae)	0	0	1	1	Methylobacillus	0	0	1	1	NA4298_(Flavobacteriaceae)	0	0	1	1
1079						NA630_(Bacteroidales RF16 group)	0	0	1	1	Microcella	0	0	1	1	NA4312_(Anaerolineaceae)	0	0	1	1
1080						NA631_(AKIW781)	0	0	1	1	Micromonospora	0	0	1	1	NA432_(JG30-KF-CM45)	0	0	1	1
1081						NA635_(Devosiaceae)	0	0	1	1	Moraxella	0	0	1	1	NA433_(Blastocatellaceae)	0	0	1	1
1082						NA637_(AKIW781)	0	0	1	1	Mumia	0	0	1	1	NA435_(Rhizobiaceae)	0	0	1	1
1083						NA64_(Planococcaceae)	0	0	1	1	Myceligenerans	0	0	1	1	NA436_(Devosiaceae)	0	0	1	1
1084						NA641_(Nitriliruptoraceae)	0	0	1	1	NA1006_(Sphingobacteriaceae)	0	0	1	1	NA441_(Muribaculaceae)	0	0	1	1
1085						NA645_(Myxococcaceae)	0	0	1	1	NA1009_(UCG-010)	0	0	1	1	NA4426_(Micrococcaceae)	0	0	1	1
1086						NA648_(Comamonadaceae)	0	0	1	1	NA101_(Microbacteriaceae)	0	0	1	1	NA443_(Vicinamibacteraceae)	0	0	1	1
1087						NA651_(Saccharofermentans)	0	0	1	1	NA1010_(Fastidiosipila)	0	0	1	1	NA444_(Xanthobacteraceae)	0	0	1	1
1088						NA658_(Planococcaceae)	0	0	1	1	NA1027_(UCG-010)	0	0	1	1	NA449_(Vicinamibacteraceae)	0	0	1	1
1089						NA659_(Lachnospiraceae)	0	0	1	1	NA103_(Micrococcaceae)	0	0	1	1	NA45_(Micrococcaceae)	0	0	1	1
1090						NA66_(Bacillaceae)	0	0	1	1	NA1035_(Streptomycetaceae)	0	0	1	1	NA450_(F082)	0	0	1	1
1091						NA665_(Euzebyaceae)	0	0	1	1	NA1078_(Longimicrobiaceae)	0	0	1	1	NA451_(Bacteroidales RF16 group)	0	0	1	1
1092						NA67_(Streptomycetaceae)	0	0	1	1	NA1084_([Eubacterium] coprostanoligenes group)	0	0	1	1	NA4540_(Roseiflexaceae)	0	0	1	1
1093						NA674_(Peptococcaceae)	0	0	1	1	NA1089_(Carnobacteriaceae)	0	0	1	1	NA4542_(Bacillaceae)	0	0	1	1
1094						NA681_(Beijerinckiaceae)	0	0	1	1	NA109_(Bacillaceae)	0	0	1	1	NA4543_(Symbiobacteraceae)	0	0	1	1
1095						NA682_(Bacillaceae)	0	0	1	1	NA1101_(Caldilineaceae)	0	0	1	1	NA4556_(Ruminococcaceae)	0	0	1	1
1096						NA694_(Spirosomaceae)	0	0	1	1	NA1105_(JG30-KF-CM45)	0	0	1	1	NA458_(Planococcaceae)	0	0	1	1
1097						NA696_(67-14)	0	0	1	1	NA1106_(Pseudonocardiaceae)	0	0	1	1	NA459_(Chitinophagaceae)	0	0	1	1
1098						NA70_(Rhodobacteraceae)	0	0	1	1	NA1109_(Bacillaceae)	0	0	1	1	NA461_(Oxalobacteraceae)	0	0	1	1
1099						NA700_(Pseudonocardiaceae)	0	0	1	1	NA1118_([Eubacterium] coprostanoligenes group)	0	0	1	1	NA462_(UCG-010)	0	0	1	1
1100						NA701_(Lachnospiraceae)	0	0	1	1	NA1135_(Bacillaceae)	0	0	1	1	NA463_(Ruminococcaceae)	0	0	1	1
1101						NA705_(Isosphaeraceae)	0	0	1	1	NA1142_(JG30-KF-CM45)	0	0	1	1	NA4665_(Longimicrobiaceae)	0	0	1	1
1102						NA706_(Microbacteriaceae)	0	0	1	1	NA1158_(Rhodothermaceae)	0	0	1	1	NA467_(Streptomycetaceae)	0	0	1	1
1103						NA707_(Tannerellaceae)	0	0	1	1	NA1162_(UCG-010)	0	0	1	1	NA4672_(Leptotrichiaceae)	0	0	1	1
1104						NA708_(WD2101 soil group)	0	0	1	1	NA1174_(Fastidiosipila)	0	0	1	1	NA4673_(Bacteroidetes BD2-2)	0	0	1	1
1105						NA710_(Rhizobiaceae)	0	0	1	1	NA1175_(Lachnospiraceae)	0	0	1	1	NA4678_(Pseudonocardiaceae)	0	0	1	1
1106						NA711_(Tepidisphaeraceae)	0	0	1	1	NA1179_(Acetobacteraceae)	0	0	1	1	NA469_(Longimicrobiaceae)	0	0	1	1
1107						NA715_(Thermoactinomycetaceae)	0	0	1	1	NA1180_(Isosphaeraceae)	0	0	1	1	NA470_(Xanthobacteraceae)	0	0	1	1
1108						NA719_(Isosphaeraceae)	0	0	1	1	NA1186_(Oligoflexus)	0	0	1	1	NA471_(Sporichthyaceae)	0	0	1	1
1109						NA72_(Carnobacteriaceae)	0	0	1	1	NA1193_(67-14)	0	0	1	1	NA472_(AKIW781)	0	0	1	1
1110						NA724_(Chitinophagaceae)	0	0	1	1	NA1195_(Oscillospiraceae)	0	0	1	1	NA475_(Lachnospiraceae)	0	0	1	1
1111						NA725_(Ilumatobacteraceae)	0	0	1	1	NA1197_(Longimicrobiaceae)	0	0	1	1	NA481_(JG30-KF-CM45)	0	0	1	1
1112						NA729_(Sporichthyaceae)	0	0	1	1	NA1205_(JG30-KF-CM45)	0	0	1	1	NA483_(Myxococcaceae)	0	0	1	1
1113						NA735_(Spirosomaceae)	0	0	1	1	NA121_(Micrococcaceae)	0	0	1	1	NA484_(Beijerinckiaceae)	0	0	1	1
1114						NA736_(67-14)	0	0	1	1	NA1235_(Micromonosporaceae)	0	0	1	1	NA487_(AKAU3644)	0	0	1	1
1115						NA738_(Pasteurellaceae)	0	0	1	1	NA1237_(AKIW781)	0	0	1	1	NA488_(Chroococcidiopsaceae)	0	0	1	1
1116						NA744_(Streptomycetaceae)	0	0	1	1	NA1242_(Caldilineaceae)	0	0	1	1	NA492_(Rhodobacteraceae)	0	0	1	1
1117						NA747_(Bacteroidales RF16 group)	0	0	1	1	NA1244_(B1-7BS)	0	0	1	1	NA493_(JG30-KF-CM45)	0	0	1	1
1118						NA748_(67-14)	0	0	1	1	NA125_(Intrasporangiaceae)	0	0	1	1	NA494_(Bacteroidales RF16 group)	0	0	1	1
1119						NA759_(Ruminococcaceae)	0	0	1	1	NA1253_(Nocardiaceae)	0	0	1	1	NA499_(Geminicoccaceae)	0	0	1	1
1120						NA762_(Microbacteriaceae)	0	0	1	1	NA1264_(Pedosphaeraceae)	0	0	1	1	NA5_(Micrococcaceae)	0	0	1	1
1121						NA763_(JG30-KF-CM45)	0	0	1	1	NA127_(Micrococcaceae)	0	0	1	1	NA500_(Planococcaceae)	0	0	1	1
1122						NA765_(Spirosomaceae)	0	0	1	1	NA1272_(Bacillaceae)	0	0	1	1	NA502_(WD2101 soil group)	0	0	1	1
1123						NA766_(Intrasporangiaceae)	0	0	1	1	NA13_(Bacillaceae)	0	0	1	1	NA504_(AKIW781)	0	0	1	1
1124						NA768_(Gemmatimonadaceae)	0	0	1	1	NA1308_(Streptomycetaceae)	0	0	1	1	NA506_(Carnobacteriaceae)	0	0	1	1
1125						NA771_(AKIW781)	0	0	1	1	NA1309_(67-14)	0	0	1	1	NA509_(Streptomycetaceae)	0	0	1	1
1126						NA774_(Chitinophagaceae)	0	0	1	1	NA1315_(Chitinophagaceae)	0	0	1	1	NA51_(Carnobacteriaceae)	0	0	1	1
1127						NA775_(Ardenticatenaceae)	0	0	1	1	NA1326_(Lachnospiraceae)	0	0	1	1	NA511_(Oxalobacteraceae)	0	0	1	1
1128						NA778_(Isosphaeraceae)	0	0	1	1	NA1327_(A4b)	0	0	1	1	NA512_(Acetobacteraceae)	0	0	1	1
1129						NA78_(Lachnospiraceae)	0	0	1	1	NA1336_(Bacillaceae)	0	0	1	1	NA513_(Geodermatophilaceae)	0	0	1	1
1130						NA782_(Bacillaceae)	0	0	1	1	NA134_(Xanthomonadaceae)	0	0	1	1	NA515_(AKIW781)	0	0	1	1
1131						NA784_(Isosphaeraceae)	0	0	1	1	NA1347_(67-14)	0	0	1	1	NA517_(Planococcaceae)	0	0	1	1
1132						NA786_(JG30-KF-CM45)	0	0	1	1	NA1358_(Symbiobacteraceae)	0	0	1	1	NA518_(Aerococcaceae)	0	0	1	1
1133						NA788_(WD2101 soil group)	0	0	1	1	NA1363_([Eubacterium] coprostanoligenes group)	0	0	1	1	NA519_(67-14)	0	0	1	1
1134						NA789_([Eubacterium] coprostanoligenes group)	0	0	1	1	NA1365_(Prolixibacteraceae)	0	0	1	1	NA52_(Bacillaceae)	0	0	1	1
1135						NA79_(Acetobacteraceae)	0	0	1	1	NA1367_(JG30-KF-CM45)	0	0	1	1	NA522_(A4b)	0	0	1	1
1136						NA795_(Acetobacteraceae)	0	0	1	1	NA1368_(WD2101 soil group)	0	0	1	1	NA523_(Micrococcaceae)	0	0	1	1
1137						NA798_(Comamonadaceae)	0	0	1	1	NA1375_(Bacillaceae)	0	0	1	1	NA528_(67-14)	0	0	1	1
1138						NA800_(JG30-KF-CM45)	0	0	1	1	NA1385_(Christensenellaceae)	0	0	1	1	NA531_(Streptomycetaceae)	0	0	1	1
1139						NA81_(Planococcaceae)	0	0	1	1	NA1387_([Eubacterium] coprostanoligenes group)	0	0	1	1	NA533_(Ruminococcaceae)	0	0	1	1
1140						NA814_(Fodinicurvataceae)	0	0	1	1	NA139_(Planococcaceae)	0	0	1	1	NA535_(Rhodobacteraceae)	0	0	1	1
1141						NA821_(Peptococcaceae)	0	0	1	1	NA1402_(Ruminococcaceae)	0	0	1	1	NA537_(AKIW781)	0	0	1	1
1142						NA824_(Lachnospiraceae)	0	0	1	1	NA1404_(Lachnospiraceae)	0	0	1	1	NA539_(Enterobacteriaceae)	0	0	1	1
1143						NA829_(Lachnospiraceae)	0	0	1	1	NA141_(JG30-KF-CM45)	0	0	1	1	NA54_(Rhodobacteraceae)	0	0	1	1
1144						NA832_([Eubacterium] coprostanoligenes group)	0	0	1	1	NA1419_(Planococcaceae)	0	0	1	1	NA540_(67-14)	0	0	1	1
1145						NA836_(Muribaculaceae)	0	0	1	1	NA1436_(Caulobacteraceae)	0	0	1	1	NA545_(Oscillospiraceae)	0	0	1	1
1146						NA84_(Rhodobacteraceae)	0	0	1	1	NA146_(Fastidiosipila)	0	0	1	1	NA55_(Intrasporangiaceae)	0	0	1	1
1147						NA840_(Muribaculaceae)	0	0	1	1	NA1463_([Eubacterium] coprostanoligenes group)	0	0	1	1	NA552_(Lachnospiraceae)	0	0	1	1
1148						NA842_(Tannerellaceae)	0	0	1	1	NA148_(Comamonadaceae)	0	0	1	1	NA553_(Lachnospiraceae)	0	0	1	1
1149						NA843_(Longimicrobiaceae)	0	0	1	1	NA1486_(F082)	0	0	1	1	NA554_(Gemmatimonadaceae)	0	0	1	1
1150						NA849_(67-14)	0	0	1	1	NA1493_(Prolixibacteraceae)	0	0	1	1	NA557_(Ilumatobacteraceae)	0	0	1	1
1151						NA85_(Solirubrobacteraceae)	0	0	1	1	NA150_(JG30-KF-CM45)	0	0	1	1	NA56_(Pseudonocardiaceae)	0	0	1	1
1152						NA850_(Solirubrobacteraceae)	0	0	1	1	NA151_(JG30-KF-CM45)	0	0	1	1	NA561_([Eubacterium] coprostanoligenes group)	0	0	1	1
1153						NA852_(Lachnospiraceae)	0	0	1	1	NA1510_(Gemmatimonadaceae)	0	0	1	1	NA562_(Ruminococcaceae)	0	0	1	1
1154						NA854_(Nocardioidaceae)	0	0	1	1	NA1519_(JG30-KF-CM45)	0	0	1	1	NA563_(MWH-CFBk5)	0	0	1	1
1155						NA86_(Lachnospiraceae)	0	0	1	1	NA1542_(Ruminococcaceae)	0	0	1	1	NA566_(Lachnospiraceae)	0	0	1	1
1156						NA862_(Euzebyaceae)	0	0	1	1	NA1557_(67-14)	0	0	1	1	NA569_(JG30-KF-CM45)	0	0	1	1
1157						NA867_(Longimicrobiaceae)	0	0	1	1	NA1563_(WD2101 soil group)	0	0	1	1	NA57_(Lachnospiraceae)	0	0	1	1
1158						NA868_(WD2101 soil group)	0	0	1	1	NA1569_(UCG-010)	0	0	1	1	NA570_(Planococcaceae)	0	0	1	1
1159						NA87_(Enterobacteriaceae)	0	0	1	1	NA1571_(Sphingobacteriaceae)	0	0	1	1	NA572_(Oscillospiraceae)	0	0	1	1
1160						NA872_(Microscillaceae)	0	0	1	1	NA1572_(JG30-KF-CM45)	0	0	1	1	NA58_(Comamonadaceae)	0	0	1	1
1161						NA875_(Prevotellaceae)	0	0	1	1	NA1574_(Nocardioidaceae)	0	0	1	1	NA580_(JG30-KF-CM45)	0	0	1	1
1162						NA88_(Enterobacteriaceae)	0	0	1	1	NA1575_(MWH-CFBk5)	0	0	1	1	NA581_(Vicinamibacteraceae)	0	0	1	1
1163						NA881_(UCG-010)	0	0	1	1	NA158_(Tissierella)	0	0	1	1	NA583_(Christensenellaceae)	0	0	1	1
1164						NA884_(67-14)	0	0	1	1	NA159_(Streptomycetaceae)	0	0	1	1	NA585_(Bacillaceae)	0	0	1	1
1165						NA89_(Lachnospiraceae)	0	0	1	1	NA160_(Flavobacteriaceae)	0	0	1	1	NA587_(Xanthomonadaceae)	0	0	1	1
1166						NA893_([Eubacterium] coprostanoligenes group)	0	0	1	1	NA1604_(Gemmatimonadaceae)	0	0	1	1	NA588_(Fastidiosipila)	0	0	1	1
1167						NA895_(Lachnospiraceae)	0	0	1	1	NA1616_(67-14)	0	0	1	1	NA592_(Comamonadaceae)	0	0	1	1
1168						NA897_(AKIW781)	0	0	1	1	NA1635_(67-14)	0	0	1	1	NA593_(Pseudonocardiaceae)	0	0	1	1
1169						NA901_(Planococcaceae)	0	0	1	1	NA1662_(Paludibacteraceae)	0	0	1	1	NA594_(Rhizobiaceae)	0	0	1	1
1170						NA91_(Microbacteriaceae)	0	0	1	1	NA1668_(Oscillospiraceae)	0	0	1	1	NA595_(Isosphaeraceae)	0	0	1	1
1171						NA910_(UCG-010)	0	0	1	1	NA167_(Guggenheimella)	0	0	1	1	NA597_(Bacteroidales BS11 gut group)	0	0	1	1
1172						NA911_(Lachnospiraceae)	0	0	1	1	NA168_(Staphylococcaceae)	0	0	1	1	NA598_(JG30-KF-CM45)	0	0	1	1
1173						NA912_(JG30-KF-CM45)	0	0	1	1	NA1681_(Sphingobacteriaceae)	0	0	1	1	NA6_(Staphylococcaceae)	0	0	1	1
1174						NA915_(Kineosporiaceae)	0	0	1	1	NA1699_(Gemmatimonadaceae)	0	0	1	1	NA601_(Lachnospiraceae)	0	0	1	1
1175						NA92_(Bacillaceae)	0	0	1	1	NA1700_(Planococcaceae)	0	0	1	1	NA602_(Weeksellaceae)	0	0	1	1
1176						NA923_(Bacillaceae)	0	0	1	1	NA1701_(Vicinamibacteraceae)	0	0	1	1	NA603_(Prolixibacteraceae)	0	0	1	1
1177						NA927_(Longimicrobiaceae)	0	0	1	1	NA1704_(F082)	0	0	1	1	NA607_(Paludibacteraceae)	0	0	1	1
1178						NA929_(Beijerinckiaceae)	0	0	1	1	NA1722_(Victivallaceae)	0	0	1	1	NA61_(Comamonadaceae)	0	0	1	1
1179						NA93_(Lachnospiraceae)	0	0	1	1	NA173_(Bacillaceae)	0	0	1	1	NA611_(Intrasporangiaceae)	0	0	1	1
1180						NA933_([Eubacterium] coprostanoligenes group)	0	0	1	1	NA1734_([Eubacterium] coprostanoligenes group)	0	0	1	1	NA614_(Tepidisphaeraceae)	0	0	1	1
1181						NA940_(Caldilineaceae)	0	0	1	1	NA1737_(Vicinamibacteraceae)	0	0	1	1	NA619_([Eubacterium] coprostanoligenes group)	0	0	1	1
1182						NA945_(JG30-KF-CM45)	0	0	1	1	NA1738_(AKIW781)	0	0	1	1	NA62_(Rhizobiaceae)	0	0	1	1
1183						NA946_(UCG-010)	0	0	1	1	NA174_(Ruminococcaceae)	0	0	1	1	NA624_(Longimicrobiaceae)	0	0	1	1
1184						NA949_(Sporichthyaceae)	0	0	1	1	NA1755_(Longimicrobiaceae)	0	0	1	1	NA629_(Ruminococcaceae)	0	0	1	1
1185						NA95_(Beijerinckiaceae)	0	0	1	1	NA1767_([Eubacterium] coprostanoligenes group)	0	0	1	1	NA631_(AKIW781)	0	0	1	1
1186						NA950_(JG30-KF-CM45)	0	0	1	1	NA1768_(67-14)	0	0	1	1	NA637_(AKIW781)	0	0	1	1
1187						NA951_(TRA3-20)	0	0	1	1	NA1782_(Microscillaceae)	0	0	1	1	NA64_(Planococcaceae)	0	0	1	1
1188						NA953_(Lachnospiraceae)	0	0	1	1	NA1792_(Erysipelotrichaceae)	0	0	1	1	NA641_(Nitriliruptoraceae)	0	0	1	1
1189						NA955_(AKIW781)	0	0	1	1	NA1793_(Ercella)	0	0	1	1	NA642_(Cellvibrionaceae)	0	0	1	1
1190						NA959_(JG30-KF-CM45)	0	0	1	1	NA1797_(Soehngenia)	0	0	1	1	NA643_(Myxococcaceae)	0	0	1	1
1191						NA960_([Eubacterium] coprostanoligenes group)	0	0	1	1	NA1799_(Lachnospiraceae)	0	0	1	1	NA645_(Myxococcaceae)	0	0	1	1
1192						NA967_(Comamonadaceae)	0	0	1	1	NA180_(Microbacteriaceae)	0	0	1	1	NA648_(Comamonadaceae)	0	0	1	1
1193						NA969_(AKIW781)	0	0	1	1	NA1808_(Bacillaceae)	0	0	1	1	NA651_(Saccharofermentans)	0	0	1	1
1194						NA97_(Nocardioidaceae)	0	0	1	1	NA1815_(AKIW781)	0	0	1	1	NA653_(Planococcaceae)	0	0	1	1
1195						NA974_(Rhizobiaceae)	0	0	1	1	NA1826_(Bacillaceae)	0	0	1	1	NA658_(Planococcaceae)	0	0	1	1
1196						NA979_(Rhizobiaceae)	0	0	1	1	NA1833_(Lachnospiraceae)	0	0	1	1	NA659_(Lachnospiraceae)	0	0	1	1
1197						NA987_(Cyclobacteriaceae)	0	0	1	1	NA1852_(Ardenticatenaceae)	0	0	1	1	NA66_(Bacillaceae)	0	0	1	1
1198						NA99_(Planococcaceae)	0	0	1	1	NA1857_(Nannocystaceae)	0	0	1	1	NA661_(Lachnospiraceae)	0	0	1	1
1199						NA993_(Longimicrobiaceae)	0	0	1	1	NA186_(Bacillaceae)	0	0	1	1	NA662_(Cyclobacteriaceae)	0	0	1	1
1200						NA995_(Chitinophagaceae)	0	0	1	1	NA187_(JG30-KF-CM45)	0	0	1	1	NA664_(Muribaculaceae)	0	0	1	1
1201						Neomicrococcus	0	0	1	1	NA19_(Micrococcaceae)	0	0	1	1	NA665_(Euzebyaceae)	0	0	1	1
1202						Niastella	0	0	1	1	NA190_(JG30-KF-CM45)	0	0	1	1	NA67_(Streptomycetaceae)	0	0	1	1
1203						Nitritalea	0	0	1	1	NA1915_(Lachnospiraceae)	0	0	1	1	NA674_(Peptococcaceae)	0	0	1	1
1204						Nonomuraea	0	0	1	1	NA192_(Planococcaceae)	0	0	1	1	NA675_(Chitinophagaceae)	0	0	1	1
1205						Nosocomiicoccus	0	0	1	1	NA1947_(F082)	0	0	1	1	NA681_(Beijerinckiaceae)	0	0	1	1
1206						Novibacillus	0	0	1	1	NA195_(Intrasporangiaceae)	0	0	1	1	NA682_(Bacillaceae)	0	0	1	1
1207						Oceanivirga	0	0	1	1	NA1950_(Pseudonocardiaceae)	0	0	1	1	NA683_(Planococcaceae)	0	0	1	1
1208						Oerskovia	0	0	1	1	NA1958_(Anaerolineaceae)	0	0	1	1	NA692_(Fastidiosipila)	0	0	1	1
1209						Olivibacter	0	0	1	1	NA1962_(Coriobacteriales Incertae Sedis)	0	0	1	1	NA693_(Microbacteriaceae)	0	0	1	1
1210						Ornithobacterium	0	0	1	1	NA1988_(Rhodothermaceae)	0	0	1	1	NA694_(Spirosomaceae)	0	0	1	1
1211						Oryzihumus	0	0	1	1	NA2008_(UCG-010)	0	0	1	1	NA696_(67-14)	0	0	1	1
1212						Oscillatoria PCC-6304	0	0	1	1	NA2048_(Gemmatimonadaceae)	0	0	1	1	NA70_(Rhodobacteraceae)	0	0	1	1
1213						p-1088-a5 gut group	0	0	1	1	NA205_(Beijerinckiaceae)	0	0	1	1	NA700_(Pseudonocardiaceae)	0	0	1	1
1214						Paenarthrobacter	0	0	1	1	NA206_(Streptomycetaceae)	0	0	1	1	NA706_(Microbacteriaceae)	0	0	1	1
1215						Paeniclostridium	0	0	1	1	NA2060_(SC-I-84)	0	0	1	1	NA708_(WD2101 soil group)	0	0	1	1
1216						Palleronia-Pseudomaribius	0	0	1	1	NA2062_(KD3-93)	0	0	1	1	NA709_(Prevotellaceae)	0	0	1	1
1217						Paraprevotella	0	0	1	1	NA2067_(Oscillospiraceae)	0	0	1	1	NA710_(Rhizobiaceae)	0	0	1	1
1218						Parvibacter	0	0	1	1	NA2068_(Rhodothermaceae)	0	0	1	1	NA715_(Thermoactinomycetaceae)	0	0	1	1
1219						Pedomicrobium	0	0	1	1	NA2077_(Oscillospiraceae)	0	0	1	1	NA718_(Bacillaceae)	0	0	1	1
1220						Pelagibius	0	0	1	1	NA2104_(Sphingobacteriaceae)	0	0	1	1	NA719_(Isosphaeraceae)	0	0	1	1
1221						Peptoclostridium	0	0	1	1	NA2106_(UCG-010)	0	0	1	1	NA72_(Carnobacteriaceae)	0	0	1	1
1222						Phormidium SAG 37.90	0	0	1	1	NA2112_([Eubacterium] coprostanoligenes group)	0	0	1	1	NA724_(Chitinophagaceae)	0	0	1	1
1223						Phycicoccus	0	0	1	1	NA2115_(Lachnospiraceae)	0	0	1	1	NA729_(Sporichthyaceae)	0	0	1	1
1224						Pigmentiphaga	0	0	1	1	NA2116_(Clostridiaceae)	0	0	1	1	NA731_(Rhodobacteraceae)	0	0	1	1
1225						Pisciglobus	0	0	1	1	NA2117_(TRA3-20)	0	0	1	1	NA732_(Chitinophagaceae)	0	0	1	1
1226						Plot4-2H12	0	0	1	1	NA215_(Comamonadaceae)	0	0	1	1	NA738_(Pasteurellaceae)	0	0	1	1
1227						Polycyclovorans	0	0	1	1	NA217_(Intrasporangiaceae)	0	0	1	1	NA745_(Myxococcaceae)	0	0	1	1
1228						Propionivibrio	0	0	1	1	NA2170_(WD2101 soil group)	0	0	1	1	NA748_(67-14)	0	0	1	1
1229						Pseudarcobacter	0	0	1	1	NA2174_(Azospirillaceae)	0	0	1	1	NA749_(67-14)	0	0	1	1
1230						Pseudoflavonifractor	0	0	1	1	NA2180_(67-14)	0	0	1	1	NA754_(Acetobacteraceae)	0	0	1	1
1231						Pseudorhodoferax	0	0	1	1	NA2188_(67-14)	0	0	1	1	NA758_(Muribaculaceae)	0	0	1	1
1232						Pseudorhodoplanes	0	0	1	1	NA22_(Beijerinckiaceae)	0	0	1	1	NA762_(Microbacteriaceae)	0	0	1	1
1233						Pseudoxanthomonas	0	0	1	1	NA2203_(Demequinaceae)	0	0	1	1	NA763_(JG30-KF-CM45)	0	0	1	1
1234						Pusillimonas	0	0	1	1	NA2207_(Muribaculaceae)	0	0	1	1	NA765_(Spirosomaceae)	0	0	1	1
1235						Pygmaiobacter	0	0	1	1	NA2211_(Lachnospiraceae)	0	0	1	1	NA766_(Intrasporangiaceae)	0	0	1	1
1236						Reyranella	0	0	1	1	NA2217_(WD2101 soil group)	0	0	1	1	NA768_(Gemmatimonadaceae)	0	0	1	1
1237						Rhabdobacter	0	0	1	1	NA222_(AKIW781)	0	0	1	1	NA771_(AKIW781)	0	0	1	1
1238						Rhizobacter	0	0	1	1	NA2228_(A4b)	0	0	1	1	NA772_(Ruminococcaceae)	0	0	1	1
1239						Rhodohalobacter	0	0	1	1	NA223_(Bacillaceae)	0	0	1	1	NA776_(Sphingomonadaceae)	0	0	1	1
1240						Rhodoplanes	0	0	1	1	NA2240_(Prevotellaceae)	0	0	1	1	NA779_(Lachnospiraceae)	0	0	1	1
1241						Rhodopseudomonas	0	0	1	1	NA2243_(UCG-010)	0	0	1	1	NA78_(Lachnospiraceae)	0	0	1	1
1242						Rickettsiella	0	0	1	1	NA226_(Myxococcaceae)	0	0	1	1	NA782_(Bacillaceae)	0	0	1	1
1243						Rothia	0	0	1	1	NA228_(JG30-KF-CM45)	0	0	1	1	NA784_(Isosphaeraceae)	0	0	1	1
1244						Rudanella	0	0	1	1	NA2281_(WD2101 soil group)	0	0	1	1	NA787_(Bacillaceae)	0	0	1	1
1245						Salirhabdus	0	0	1	1	NA2307_(WD2101 soil group)	0	0	1	1	NA788_(WD2101 soil group)	0	0	1	1
1246						Salmonella	0	0	1	1	NA231_(Nocardioidaceae)	0	0	1	1	NA789_([Eubacterium] coprostanoligenes group)	0	0	1	1
1247						Sandaracinus	0	0	1	1	NA2313_(Ilumatobacteraceae)	0	0	1	1	NA79_(Acetobacteraceae)	0	0	1	1
1248						Schwartzia	0	0	1	1	NA232_(Geodermatophilaceae)	0	0	1	1	NA792_(Blastocatellaceae)	0	0	1	1
1249						SH-PL14	0	0	1	1	NA2321_(Bacteroidales BS11 gut group)	0	0	1	1	NA800_(JG30-KF-CM45)	0	0	1	1
1250						Sharpea	0	0	1	1	NA2356_(JG30-KF-CM45)	0	0	1	1	NA801_(Streptomycetaceae)	0	0	1	1
1251						Shewanella	0	0	1	1	NA236_(Gemmatimonadaceae)	0	0	1	1	NA81_(Planococcaceae)	0	0	1	1
1252						Shimazuella	0	0	1	1	NA2384_(TRA3-20)	0	0	1	1	NA810_(AKIW781)	0	0	1	1
1253						Shinella	0	0	1	1	NA2394_(UCG-010)	0	0	1	1	NA811_(Bacillaceae)	0	0	1	1
1254						Siccirubricoccus	0	0	1	1	NA2395_(Bacteroidales BS11 gut group)	0	0	1	1	NA813_(Bacteroidales RF16 group)	0	0	1	1
1255						Sinomonas	0	0	1	1	NA240_(Xanthomonadaceae)	0	0	1	1	NA814_(Fodinicurvataceae)	0	0	1	1
1256						Slackia	0	0	1	1	NA2405_(Anaerolineaceae)	0	0	1	1	NA82_(Lachnospiraceae)	0	0	1	1
1257						Sphaerobacter	0	0	1	1	NA2407_(Rhodobacteraceae)	0	0	1	1	NA821_(Peptococcaceae)	0	0	1	1
1258						Sphaerotilus	0	0	1	1	NA241_(UCG-010)	0	0	1	1	NA824_(Lachnospiraceae)	0	0	1	1
1259						Sphingopyxis	0	0	1	1	NA2433_(Lachnospiraceae)	0	0	1	1	NA825_(Prevotellaceae)	0	0	1	1
1260						Spirillospora	0	0	1	1	NA2436_(67-14)	0	0	1	1	NA835_(Lachnospiraceae)	0	0	1	1
1261						Sporacetigenium	0	0	1	1	NA2437_(Bacillaceae)	0	0	1	1	NA836_(Muribaculaceae)	0	0	1	1
1262						Sporichthya	0	0	1	1	NA2445_(Sphingobacteriaceae)	0	0	1	1	NA84_(Rhodobacteraceae)	0	0	1	1
1263						Stackebrandtia	0	0	1	1	NA249_(Rhodobacteraceae)	0	0	1	1	NA840_(Muribaculaceae)	0	0	1	1
1264						Synechococcus CC9902	0	0	1	1	NA2499_(Caldilineaceae)	0	0	1	1	NA843_(Longimicrobiaceae)	0	0	1	1
1265						Synergistes	0	0	1	1	NA250_(Planococcaceae)	0	0	1	1	NA844_(Bacillaceae)	0	0	1	1
1266						Tabrizicola	0	0	1	1	NA2511_(67-14)	0	0	1	1	NA849_(67-14)	0	0	1	1
1267						Taibaiella	0	0	1	1	NA2517_(Cytophagaceae)	0	0	1	1	NA85_(Solirubrobacteraceae)	0	0	1	1
1268						Tardiphaga	0	0	1	1	NA252_(Sphingomonadaceae)	0	0	1	1	NA850_(Solirubrobacteraceae)	0	0	1	1
1269						Tatumella	0	0	1	1	NA2522_(Bacteroidales RF16 group)	0	0	1	1	NA852_(Lachnospiraceae)	0	0	1	1
1270						Thalassobacillus	0	0	1	1	NA2526_(Roseiflexaceae)	0	0	1	1	NA854_(Nocardioidaceae)	0	0	1	1
1271						Tolypothrix	0	0	1	1	NA254_(JG30-KF-CM45)	0	0	1	1	NA858_(Lachnospiraceae)	0	0	1	1
1272						Trichococcus	0	0	1	1	NA2551_(Victivallaceae)	0	0	1	1	NA86_(Lachnospiraceae)	0	0	1	1
1273						Trueperella	0	0	1	1	NA2576_(JG30-KF-CM45)	0	0	1	1	NA862_(Euzebyaceae)	0	0	1	1
1274						Turneriella	0	0	1	1	NA258_(Muribaculaceae)	0	0	1	1	NA863_(Microscillaceae)	0	0	1	1
1275						Tychonema CCAP 1459-11B	0	0	1	1	NA259_(JG30-KF-CM45)	0	0	1	1	NA867_(Longimicrobiaceae)	0	0	1	1
1276						UCG-007	0	0	1	1	NA261_(Bacteroidales RF16 group)	0	0	1	1	NA868_(WD2101 soil group)	0	0	1	1
1277						UCG-009	0	0	1	1	NA262_(Nocardioidaceae)	0	0	1	1	NA87_(Enterobacteriaceae)	0	0	1	1
1278						Ulvibacter	0	0	1	1	NA2626_(type III)	0	0	1	1	NA871_(Bacillaceae)	0	0	1	1
1279						Umezawaea	0	0	1	1	NA263_(Microtrichaceae)	0	0	1	1	NA872_(Microscillaceae)	0	0	1	1
1280						Vagococcus	0	0	1	1	NA265_(Enterobacteriaceae)	0	0	1	1	NA88_(Enterobacteriaceae)	0	0	1	1
1281						Variovorax	0	0	1	1	NA268_(Rhodobacteraceae)	0	0	1	1	NA881_(UCG-010)	0	0	1	1
1282						Veillonella	0	0	1	1	NA2682_(Rhodobacteraceae)	0	0	1	1	NA884_(67-14)	0	0	1	1
1283						Vicingus	0	0	1	1	NA271_(JG30-KF-CM45)	0	0	1	1	NA886_(Xanthobacteraceae)	0	0	1	1
1284						Viridibacillus	0	0	1	1	NA276_(Bacillaceae)	0	0	1	1	NA889_(AKIW781)	0	0	1	1
1285						Williamsia	0	0	1	1	NA277_(Chitinophagaceae)	0	0	1	1	NA891_(Oscillospiraceae)	0	0	1	1
1286						Wilmottia Ant-Ph58	0	0	1	1	NA2789_(Nocardiopsaceae)	0	0	1	1	NA893_([Eubacterium] coprostanoligenes group)	0	0	1	1
1287						Xylanimonas	0	0	1	1	NA2791_(Symbiobacteraceae)	0	0	1	1	NA895_(Lachnospiraceae)	0	0	1	1
1288						Youngiibacter	0	0	1	1	NA2796_(Marinifilaceae)	0	0	1	1	NA897_(AKIW781)	0	0	1	1
1289						Zoogloea	0	0	1	1	NA2800_(Lachnospiraceae)	0	0	1	1	NA902_([Eubacterium] coprostanoligenes group)	0	0	1	1
1290						Bogoriella	0	1	0	1	NA2803_(Erysipelatoclostridiaceae)	0	0	1	1	NA904_(Rhizobiaceae)	0	0	1	1
1291						Comamonas	0	1	0	1	NA281_(Microbacteriaceae)	0	0	1	1	NA905_(Intrasporangiaceae)	0	0	1	1
1292						NA1378_(Longimicrobiaceae)	0	1	0	1	NA2829_(Pirellulaceae)	0	0	1	1	NA907_(Desulfovibrionaceae)	0	0	1	1
1293						NA232_(Geodermatophilaceae)	0	1	0	1	NA283_(Streptomycetaceae)	0	0	1	1	NA908_(UCG-010)	0	0	1	1
1294						NA320_(AKIW781)	0	1	0	1	NA284_(Bacillaceae)	0	0	1	1	NA909_(Microscillaceae)	0	0	1	1
1295						NA351_(Microbacteriaceae)	0	1	0	1	NA287_(Nocardioidaceae)	0	0	1	1	NA91_(Microbacteriaceae)	0	0	1	1
1296						NA365_(JG30-KF-CM45)	0	1	0	1	NA288_(Longimicrobiaceae)	0	0	1	1	NA910_(UCG-010)	0	0	1	1
1297						NA390_(JG30-KF-CM45)	0	1	0	1	NA2886_(Saprospiraceae)	0	0	1	1	NA911_(Lachnospiraceae)	0	0	1	1
1298						NA662_(Cyclobacteriaceae)	0	1	0	1	NA289_(Intrasporangiaceae)	0	0	1	1	NA913_(UCG-010)	0	0	1	1
1299						NA749_(67-14)	0	1	0	1	NA2893_(Lachnospiraceae)	0	0	1	1	NA915_(Kineosporiaceae)	0	0	1	1
1300						NA810_(AKIW781)	0	1	0	1	NA29_(Bacillaceae)	0	0	1	1	NA92_(Bacillaceae)	0	0	1	1
1301											NA2908_(Muribaculaceae)	0	0	1	1	NA920_(Streptomycetaceae)	0	0	1	1
1302											NA291_(67-14)	0	0	1	1	NA929_(Beijerinckiaceae)	0	0	1	1
1303											NA292_(UCG-010)	0	0	1	1	NA93_(Lachnospiraceae)	0	0	1	1
1304											NA2921_(Lachnospiraceae)	0	0	1	1	NA933_([Eubacterium] coprostanoligenes group)	0	0	1	1
1305											NA2924_(Longimicrobiaceae)	0	0	1	1	NA938_(Lachnospiraceae)	0	0	1	1
1306											NA2931_(Acidaminococcaceae)	0	0	1	1	NA940_(Caldilineaceae)	0	0	1	1
1307											NA2981_(Isosphaeraceae)	0	0	1	1	NA942_(Isosphaeraceae)	0	0	1	1
1308											NA299_(Bacillaceae)	0	0	1	1	NA946_(UCG-010)	0	0	1	1
1309											NA3019_(Gemmataceae)	0	0	1	1	NA947_(Lachnospiraceae)	0	0	1	1
1310											NA3031_(Flavobacteriaceae)	0	0	1	1	NA949_(Sporichthyaceae)	0	0	1	1
1311											NA3042_(Flavobacteriaceae)	0	0	1	1	NA95_(Beijerinckiaceae)	0	0	1	1
1312											NA3066_(F082)	0	0	1	1	NA951_(TRA3-20)	0	0	1	1
1313											NA309_(Anaerolineaceae)	0	0	1	1	NA955_(AKIW781)	0	0	1	1
1314											NA31_(Planococcaceae)	0	0	1	1	NA958_(p-251-o5)	0	0	1	1
1315											NA317_(Peptococcaceae)	0	0	1	1	NA960_([Eubacterium] coprostanoligenes group)	0	0	1	1
1316											NA3178_(Gemmataceae)	0	0	1	1	NA969_(AKIW781)	0	0	1	1
1317											NA319_(Planococcaceae)	0	0	1	1	NA97_(Nocardioidaceae)	0	0	1	1
1318											NA32_(Planococcaceae)	0	0	1	1	NA975_(Longimicrobiaceae)	0	0	1	1
1319											NA320_(AKIW781)	0	0	1	1	NA976_(UCG-010)	0	0	1	1
1320											NA3208_(Longimicrobiaceae)	0	0	1	1	NA979_(Rhizobiaceae)	0	0	1	1
1321											NA321_(Micromonosporaceae)	0	0	1	1	NA985_(Microtrichaceae)	0	0	1	1
1322											NA3212_(Barnesiellaceae)	0	0	1	1	NA987_(Cyclobacteriaceae)	0	0	1	1
1323											NA3213_(Ardenticatenaceae)	0	0	1	1	NA99_(Planococcaceae)	0	0	1	1
1324											NA3215_(Guggenheimella)	0	0	1	1	NA991_(Microbacteriaceae)	0	0	1	1
1325											NA322_(Bacillaceae)	0	0	1	1	NA995_(Chitinophagaceae)	0	0	1	1
1326											NA3250_(Hydrogenoanaerobacterium)	0	0	1	1	Nannocystis	0	0	1	1
1327											NA327_([Eubacterium] coprostanoligenes group)	0	0	1	1	Neo-b11	0	0	1	1
1328											NA3280_(Limnochordaceae)	0	0	1	1	Neomicrococcus	0	0	1	1
1329											NA3319_(Rhodothermaceae)	0	0	1	1	Nevskia	0	0	1	1
1330											NA332_([Eubacterium] coprostanoligenes group)	0	0	1	1	Niabella	0	0	1	1
1331											NA3339_(Ruminococcaceae)	0	0	1	1	Nitritalea	0	0	1	1
1332											NA3379_([Eubacterium] coprostanoligenes group)	0	0	1	1	Nitrobacter	0	0	1	1
1333											NA3396_(Bacteroidales RF16 group)	0	0	1	1	Nitrospira	0	0	1	1
1334											NA3439_(Bacteroidales RF16 group)	0	0	1	1	Niveibacterium	0	0	1	1
1335											NA3458_(Rhizobiales Incertae Sedis)	0	0	1	1	Nosocomiicoccus	0	0	1	1
1336											NA347_(Burkholderiaceae)	0	0	1	1	Novibacillus	0	0	1	1
1337											NA3489_(UCG-010)	0	0	1	1	NS5 marine group	0	0	1	1
1338											NA355_(Rhizobiaceae)	0	0	1	1	Oblitimonas	0	0	1	1
1339											NA357_([Eubacterium] coprostanoligenes group)	0	0	1	1	Oceanicella	0	0	1	1
1340											NA3571_(Microscillaceae)	0	0	1	1	Oceanobacter	0	0	1	1
1341											NA358_(Pseudonocardiaceae)	0	0	1	1	Ochrobactrum	0	0	1	1
1342											NA360_(Kineosporiaceae)	0	0	1	1	Odoribacter	0	0	1	1
1343											NA3602_(Reyranellaceae)	0	0	1	1	Oerskovia	0	0	1	1
1344											NA3614_(Silvanigrellaceae)	0	0	1	1	OLB17	0	0	1	1
1345											NA363_(UCG-010)	0	0	1	1	Olivibacter	0	0	1	1
1346											NA3635_(Chitinophagaceae)	0	0	1	1	Ornithobacterium	0	0	1	1
1347											NA3640_(FFCH9454)	0	0	1	1	Oryzihumus	0	0	1	1
1348											NA365_(JG30-KF-CM45)	0	0	1	1	Ottowia	0	0	1	1
1349											NA367_(Bacteroidales RF16 group)	0	0	1	1	p-1088-a5 gut group	0	0	1	1
1350											NA371_(Fodinicurvataceae)	0	0	1	1	Paenalcaligenes	0	0	1	1
1351											NA3718_(Lachnospiraceae)	0	0	1	1	Paenarthrobacter	0	0	1	1
1352											NA3720_(Lachnospiraceae)	0	0	1	1	Paenochrobactrum	0	0	1	1
1353											NA377_(Vicinamibacteraceae)	0	0	1	1	Palleronia-Pseudomaribius	0	0	1	1
1354											NA3779_(TRA3-20)	0	0	1	1	Paludibacter	0	0	1	1
1355											NA3783_(Anaerococcus)	0	0	1	1	Paludicola	0	0	1	1
1356											NA3791_(Sandaracinaceae)	0	0	1	1	Parasegetibacter	0	0	1	1
1357											NA384_(Cellvibrionaceae)	0	0	1	1	Parvibacter	0	0	1	1
1358											NA3852_(Clostridiaceae)	0	0	1	1	Pedomicrobium	0	0	1	1
1359											NA3884_(Bacteriovoracaceae)	0	0	1	1	Peptoclostridium	0	0	1	1
1360											NA3885_(Lachnospiraceae)	0	0	1	1	Peptococcus	0	0	1	1
1361											NA3887_([Eubacterium] coprostanoligenes group)	0	0	1	1	Phaselicystis	0	0	1	1
1362											NA3899_(DEV007)	0	0	1	1	Phormidium CYN64	0	0	1	1
1363											NA390_(JG30-KF-CM45)	0	0	1	1	Phycicoccus	0	0	1	1
1364											NA3900_(JG30-KF-CM45)	0	0	1	1	Phytohabitans	0	0	1	1
1365											NA394_(Micromonosporaceae)	0	0	1	1	Pigmentiphaga	0	0	1	1
1366											NA396_(JG30-KF-CM45)	0	0	1	1	Pisciglobus	0	0	1	1
1367											NA3971_(Fimbriimonadaceae)	0	0	1	1	Plot4-2H12	0	0	1	1
1368											NA3972_(Rhodobacteraceae)	0	0	1	1	PMMR1	0	0	1	1
1369											NA3982_(Aerococcaceae)	0	0	1	1	Polycyclovorans	0	0	1	1
1370											NA3997_(Dysgonomonadaceae)	0	0	1	1	Pontibaca	0	0	1	1
1371											NA4029_(SM2D12)	0	0	1	1	Porphyromonas	0	0	1	1
1372											NA4107_(B1-7BS)	0	0	1	1	Prevotellaceae YAB2003 group	0	0	1	1
1373											NA4111_(Verrucomicrobiaceae)	0	0	1	1	Procabacter	0	0	1	1
1374											NA4116_(Bacteroidales UCG-001)	0	0	1	1	Promicromonospora	0	0	1	1
1375											NA416_(Intrasporangiaceae)	0	0	1	1	Proteus	0	0	1	1
1376											NA418_(Pseudonocardiaceae)	0	0	1	1	Pseudaminobacter	0	0	1	1
1377											NA420_(WD2101 soil group)	0	0	1	1	Pseudoclavibacter	0	0	1	1
1378											NA422_(Lachnospiraceae)	0	0	1	1	Pseudorhodoferax	0	0	1	1
1379											NA4226_(Isosphaeraceae)	0	0	1	1	Pseudorhodoplanes	0	0	1	1
1380											NA4231_(env.OPS 17)	0	0	1	1	Pseudosphingobacterium	0	0	1	1
1381											NA4232_(Bacillaceae)	0	0	1	1	Pseudoxanthomonas	0	0	1	1
1382											NA4242_(Flavobacteriaceae)	0	0	1	1	Pusillimonas	0	0	1	1
1383											NA427_(Sphingomonadaceae)	0	0	1	1	Rhabdobacter	0	0	1	1
1384											NA432_(JG30-KF-CM45)	0	0	1	1	Rheinheimera	0	0	1	1
1385											NA433_(Blastocatellaceae)	0	0	1	1	Rhizobacter	0	0	1	1
1386											NA4334_(Pirellulaceae)	0	0	1	1	Rhodovastum	0	0	1	1
1387											NA4335_(Rickettsiaceae)	0	0	1	1	Risungbinella	0	0	1	1
1388											NA4337_(Babeliaceae)	0	0	1	1	Rothia	0	0	1	1
1389											NA4339_(Ardenticatenaceae)	0	0	1	1	Rudaea	0	0	1	1
1390											NA4346_(Thermoactinomycetaceae)	0	0	1	1	Rummeliibacillus	0	0	1	1
1391											NA435_(Rhizobiaceae)	0	0	1	1	Salegentibacter	0	0	1	1
1392											NA441_(Muribaculaceae)	0	0	1	1	Salinarimonas	0	0	1	1
1393											NA4501_(Bacteriovoracaceae)	0	0	1	1	Salipaludibacillus	0	0	1	1
1394											NA4502_(UA-50)	0	0	1	1	Salirhabdus	0	0	1	1
1395											NA4506_(Selenomonadaceae)	0	0	1	1	Salmonella	0	0	1	1
1396											NA458_(Planococcaceae)	0	0	1	1	Sarcina	0	0	1	1
1397											NA4581_(Parachlamydiaceae)	0	0	1	1	Savagea	0	0	1	1
1398											NA4582_(A4b)	0	0	1	1	Seinonella	0	0	1	1
1399											NA459_(Chitinophagaceae)	0	0	1	1	Selenomonas	0	0	1	1
1400											NA4597_(Ruminococcaceae)	0	0	1	1	Serinicoccus	0	0	1	1
1401											NA461_(Oxalobacteraceae)	0	0	1	1	SH-PL14	0	0	1	1
1402											NA463_(Ruminococcaceae)	0	0	1	1	Sharpea	0	0	1	1
1403											NA466_(Micrococcaceae)	0	0	1	1	Shewanella	0	0	1	1
1404											NA467_(Streptomycetaceae)	0	0	1	1	Shuttleworthia	0	0	1	1
1405											NA4702_(Phycisphaeraceae)	0	0	1	1	Siccirubricoccus	0	0	1	1
1406											NA472_(AKIW781)	0	0	1	1	Sinomicrobium	0	0	1	1
1407											NA480_(Cellvibrionaceae)	0	0	1	1	Sinomonas	0	0	1	1
1408											NA483_(Myxococcaceae)	0	0	1	1	Slackia	0	0	1	1
1409											NA484_(Beijerinckiaceae)	0	0	1	1	Sorangium	0	0	1	1
1410											NA493_(JG30-KF-CM45)	0	0	1	1	Spirillospora	0	0	1	1
1411											NA499_(Geminicoccaceae)	0	0	1	1	Stenotrophobacter	0	0	1	1
1412											NA500_(Planococcaceae)	0	0	1	1	Streptacidiphilus	0	0	1	1
1413											NA502_(WD2101 soil group)	0	0	1	1	Streptomonospora	0	0	1	1
1414											NA509_(Streptomycetaceae)	0	0	1	1	Subtercola	0	0	1	1
1415											NA51_(Carnobacteriaceae)	0	0	1	1	Succinatimonas	0	0	1	1
1416											NA517_(Planococcaceae)	0	0	1	1	Succinivibrionaceae UCG-001	0	0	1	1
1417											NA518_(Aerococcaceae)	0	0	1	1	Succinivibrionaceae UCG-002	0	0	1	1
1418											NA519_(67-14)	0	0	1	1	Sulfurimonas	0	0	1	1
1419											NA52_(Bacillaceae)	0	0	1	1	Sulfurospirillum	0	0	1	1
1420											NA524_(Sphingomonadaceae)	0	0	1	1	Synechococcus CC9902	0	0	1	1
1421											NA529_(Solirubrobacteraceae)	0	0	1	1	Synergistes	0	0	1	1
1422											NA531_(Streptomycetaceae)	0	0	1	1	Syntrophomonas	0	0	1	1
1423											NA537_(AKIW781)	0	0	1	1	SZB85	0	0	1	1
1424											NA540_(67-14)	0	0	1	1	Tatumella	0	0	1	1
1425											NA55_(Intrasporangiaceae)	0	0	1	1	Terrabacter	0	0	1	1
1426											NA554_(Gemmatimonadaceae)	0	0	1	1	Terrisporobacter	0	0	1	1
1427											NA56_(Pseudonocardiaceae)	0	0	1	1	Thalassobacillus	0	0	1	1
1428											NA561_([Eubacterium] coprostanoligenes group)	0	0	1	1	Thermoactinomyces	0	0	1	1
1429											NA562_(Ruminococcaceae)	0	0	1	1	Thermobaculum	0	0	1	1
1430											NA565_(Rhizobiaceae)	0	0	1	1	Thiopseudomonas	0	0	1	1
1431											NA569_(JG30-KF-CM45)	0	0	1	1	TM7a	0	0	1	1
1432											NA570_(Planococcaceae)	0	0	1	1	Tolumonas	0	0	1	1
1433											NA577_(Azospirillaceae)	0	0	1	1	Trichococcus	0	0	1	1
1434											NA580_(JG30-KF-CM45)	0	0	1	1	Trichocoleus SAG 26.92	0	0	1	1
1435											NA585_(Bacillaceae)	0	0	1	1	Trueperella	0	0	1	1
1436											NA587_(Xanthomonadaceae)	0	0	1	1	Tunicatimonas	0	0	1	1
1437											NA588_(Fastidiosipila)	0	0	1	1	Tychonema CCAP 1459-11B	0	0	1	1
1438											NA593_(Pseudonocardiaceae)	0	0	1	1	Umezawaea	0	0	1	1
1439											NA597_(Bacteroidales BS11 gut group)	0	0	1	1	Variovorax	0	0	1	1
1440											NA598_(JG30-KF-CM45)	0	0	1	1	Verruc-01	0	0	1	1
1441											NA6_(Staphylococcaceae)	0	0	1	1	Vicinamibacter	0	0	1	1
1442											NA602_(Weeksellaceae)	0	0	1	1	Williamsia	0	0	1	1
1443											NA608_([Eubacterium] coprostanoligenes group)	0	0	1	1	Woeseia	0	0	1	1
1444											NA61_(Comamonadaceae)	0	0	1	1	Xylanimonas	0	0	1	1
1445											NA619_([Eubacterium] coprostanoligenes group)	0	0	1	1	Zhihengliuella	0	0	1	1
1446											NA629_(Ruminococcaceae)	0	0	1	1	Zymobacter	0	0	1	1
1447											NA642_(Cellvibrionaceae)	0	0	1	1	Ellin6067	0	1	0	1
1448											NA651_(Saccharofermentans)	0	0	1	1	NA1059_(Isosphaeraceae)	0	1	0	1
1449											NA657_(Rhodanobacteraceae)	0	0	1	1	NA141_(JG30-KF-CM45)	0	1	0	1
1450											NA658_(Planococcaceae)	0	0	1	1	NA222_(AKIW781)	0	1	0	1
1451											NA659_(Lachnospiraceae)	0	0	1	1	NA231_(Nocardioidaceae)	0	1	0	1
1452											NA67_(Streptomycetaceae)	0	0	1	1	NA259_(JG30-KF-CM45)	0	1	0	1
1453											NA674_(Peptococcaceae)	0	0	1	1	NA295_(Longimicrobiaceae)	0	1	0	1
1454											NA675_(Chitinophagaceae)	0	0	1	1	NA327_([Eubacterium] coprostanoligenes group)	0	1	0	1
1455											NA682_(Bacillaceae)	0	0	1	1	NA365_(JG30-KF-CM45)	0	1	0	1
1456											NA683_(Planococcaceae)	0	0	1	1	NA549_(67-14)	0	1	0	1
1457											NA692_(Fastidiosipila)	0	0	1	1	NA608_([Eubacterium] coprostanoligenes group)	0	1	0	1
1458											NA696_(67-14)	0	0	1	1	NA759_(Ruminococcaceae)	0	1	0	1
1459											NA700_(Pseudonocardiaceae)	0	0	1	1	NA832_([Eubacterium] coprostanoligenes group)	0	1	0	1
1460											NA701_(Lachnospiraceae)	0	0	1	1
1461											NA708_(WD2101 soil group)	0	0	1	1
1462											NA710_(Rhizobiaceae)	0	0	1	1
1463											NA715_(Thermoactinomycetaceae)	0	0	1	1
1464											NA718_(Bacillaceae)	0	0	1	1
1465											NA736_(67-14)	0	0	1	1
1466											NA744_(Streptomycetaceae)	0	0	1	1
1467											NA748_(67-14)	0	0	1	1
1468											NA749_(67-14)	0	0	1	1
1469											NA758_(Muribaculaceae)	0	0	1	1
1470											NA759_(Ruminococcaceae)	0	0	1	1
1471											NA766_(Intrasporangiaceae)	0	0	1	1
1472											NA767_(Actinomycetaceae)	0	0	1	1
1473											NA768_(Gemmatimonadaceae)	0	0	1	1
1474											NA775_(Ardenticatenaceae)	0	0	1	1
1475											NA787_(Bacillaceae)	0	0	1	1
1476											NA789_([Eubacterium] coprostanoligenes group)	0	0	1	1
1477											NA79_(Acetobacteraceae)	0	0	1	1
1478											NA792_(Blastocatellaceae)	0	0	1	1
1479											NA800_(JG30-KF-CM45)	0	0	1	1
1480											NA802_(Ruminococcaceae)	0	0	1	1
1481											NA811_(Bacillaceae)	0	0	1	1
1482											NA813_(Bacteroidales RF16 group)	0	0	1	1
1483											NA821_(Peptococcaceae)	0	0	1	1
1484											NA826_(Promicromonosporaceae)	0	0	1	1
1485											NA828_(Beijerinckiaceae)	0	0	1	1
1486											NA832_([Eubacterium] coprostanoligenes group)	0	0	1	1
1487											NA835_(Lachnospiraceae)	0	0	1	1
1488											NA837_(Bacillaceae)	0	0	1	1
1489											NA838_(Nocardioidaceae)	0	0	1	1
1490											NA841_(Ruminococcaceae)	0	0	1	1
1491											NA842_(Tannerellaceae)	0	0	1	1
1492											NA844_(Bacillaceae)	0	0	1	1
1493											NA85_(Solirubrobacteraceae)	0	0	1	1
1494											NA852_(Lachnospiraceae)	0	0	1	1
1495											NA854_(Nocardioidaceae)	0	0	1	1
1496											NA859_(Rhizobiaceae)	0	0	1	1
1497											NA86_(Lachnospiraceae)	0	0	1	1
1498											NA863_(Microscillaceae)	0	0	1	1
1499											NA871_(Bacillaceae)	0	0	1	1
1500											NA88_(Enterobacteriaceae)	0	0	1	1
1501											NA881_(UCG-010)	0	0	1	1
1502											NA884_(67-14)	0	0	1	1
1503											NA893_([Eubacterium] coprostanoligenes group)	0	0	1	1
1504											NA897_(AKIW781)	0	0	1	1
1505											NA902_([Eubacterium] coprostanoligenes group)	0	0	1	1
1506											NA910_(UCG-010)	0	0	1	1
1507											NA911_(Lachnospiraceae)	0	0	1	1
1508											NA912_(JG30-KF-CM45)	0	0	1	1
1509											NA92_(Bacillaceae)	0	0	1	1
1510											NA922_([Eubacterium] coprostanoligenes group)	0	0	1	1
1511											NA93_(Lachnospiraceae)	0	0	1	1
1512											NA953_(Lachnospiraceae)	0	0	1	1
1513											NA958_(p-251-o5)	0	0	1	1
1514											NA959_(JG30-KF-CM45)	0	0	1	1
1515											NA97_(Nocardioidaceae)	0	0	1	1
1516											NA975_(Longimicrobiaceae)	0	0	1	1
1517											NA976_(UCG-010)	0	0	1	1
1518											NA985_(Microtrichaceae)	0	0	1	1
1519											NA99_(Planococcaceae)	0	0	1	1
1520											NA998_(JG30-KF-CM45)	0	0	1	1
1521											Neoscardovia	0	0	1	1
1522											Niabella	0	0	1	1
1523											Nibrella	0	0	1	1
1524											Nordella	0	0	1	1
1525											Nosocomiicoccus	0	0	1	1
1526											NS2b marine group	0	0	1	1
1527											Oceanisphaera	0	0	1	1
1528											Oerskovia	0	0	1	1
1529											OM27 clade	0	0	1	1
1530											Oryzihumus	0	0	1	1
1531											Oxalophagus	0	0	1	1
1532											p-1088-a5 gut group	0	0	1	1
1533											P3OB-42	0	0	1	1
1534											Paenarthrobacter	0	0	1	1
1535											Parasegetibacter	0	0	1	1
1536											Parvibacter	0	0	1	1
1537											Parvibaculum	0	0	1	1
1538											Patulibacter	0	0	1	1
1539											Peptoclostridium	0	0	1	1
1540											Piscibacillus	0	0	1	1
1541											Planifilum	0	0	1	1
1542											Pragia	0	0	1	1
1543											Pseudoclavibacter	0	0	1	1
1544											Pseudorhodoplanes	0	0	1	1
1545											Raoultella	0	0	1	1
1546											RB41	0	0	1	1
1547											Rhodohalobacter	0	0	1	1
1548											Rhodopirellula	0	0	1	1
1549											Rhodoplanes	0	0	1	1
1550											Risungbinella	0	0	1	1
1551											Roseimarinus	0	0	1	1
1552											Salipaludibacillus	0	0	1	1
1553											Sarcina	0	0	1	1
1554											Scopulibacillus	0	0	1	1
1555											Sharpea	0	0	1	1
1556											Shewanella	0	0	1	1
1557											Shimazuella	0	0	1	1
1558											Singulisphaera	0	0	1	1
1559											Sinibacillus	0	0	1	1
1560											Sinomonas	0	0	1	1
1561											Solobacterium	0	0	1	1
1562											Sphingopyxis	0	0	1	1
1563											Sphingorhabdus	0	0	1	1
1564											Sporacetigenium	0	0	1	1
1565											Sporocytophaga	0	0	1	1
1566											Sva0996 marine group	0	0	1	1
1567											Tahibacter	0	0	1	1
1568											Tessaracoccus	0	0	1	1
1569											Thermoactinomyces	0	0	1	1
1570											Thermocrispum	0	0	1	1
1571											Trichococcus	0	0	1	1
1572											UC5-1-2E3	0	0	1	1
1573											Umezawaea	0	0	1	1
1574											Vagococcus	0	0	1	1
1575											Viridibacillus	0	0	1	1
1576											Woeseia	0	0	1	1
1577											Youngiibacter	0	0	1	1
1578											Zhihengliuella	0	0	1	1
1579											Chryseomicrobium	0	1	0	1
1580											NA244_(Promicromonosporaceae)	0	1	0	1
sum		152	75	1022	1249		307	36	3045	3388		2438	5	1721	4164		183	35	3594	3812
